# Supplementary material for: Large-Scale Quality Analysis of Published ChIP-seq Data
Source: PubMed Central journal article supplement (PMC3931556; doi:10.1534/g3.113.008680), 2013-12-17
Supplement: supp_g3.113.008680_FigureS2.pdf [file supp_g3.113.008680_FigureS2.pdf]

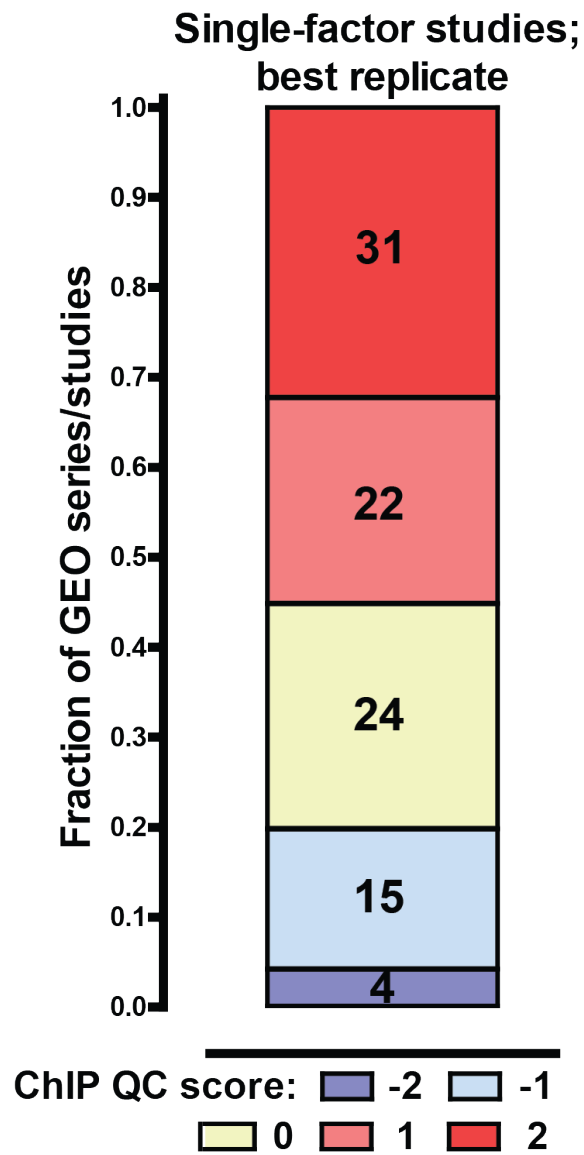

Figure S2: Distribution of the maximum SPP QC scores for studies in which only a single transcription factor was assayed.
