# Supplementary material for: Large-Scale Quality Analysis of Published ChIP-seq Data
Source: PubMed Central journal article supplement (PMC3931556; doi:10.1534/g3.113.008680), 2013-12-17
Supplement: supp_g3.113.008680_FigureS3.pdf [file supp_g3.113.008680_FigureS3.pdf]

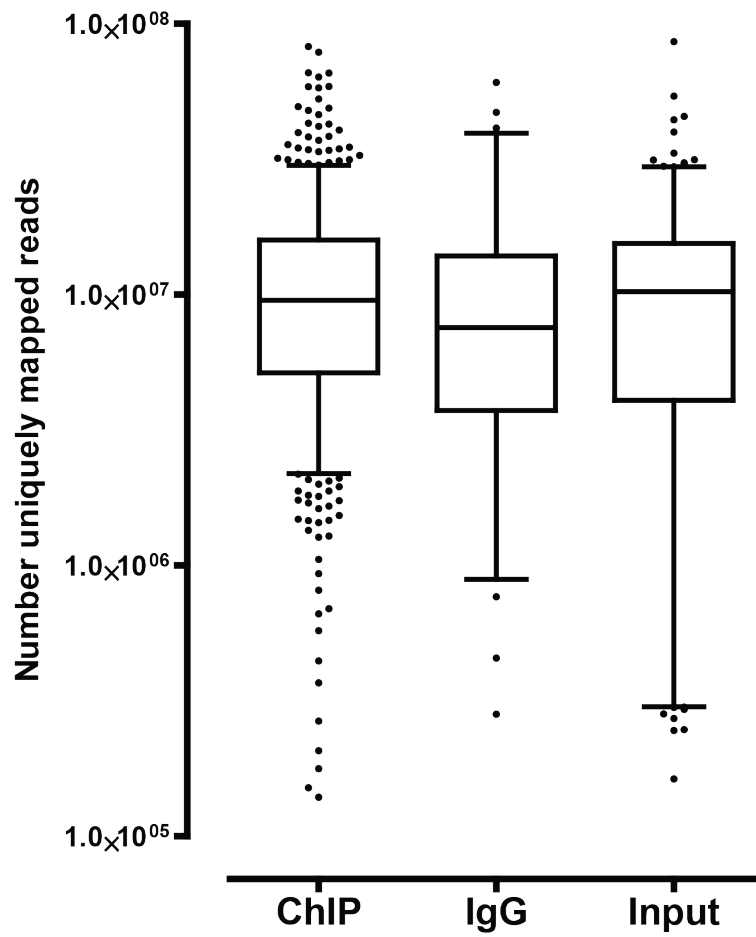

Figure S3: Sequencing depth distribution for ChIP-seq and IgG and Input control datasets.
