# Supplementary material for: Large-Scale Quality Analysis of Published ChIP-seq Data
Source: PubMed Central journal article supplement (PMC3931556; doi:10.1534/g3.113.008680), 2013-12-17
Supplement: supp_g3.113.008680_FigureS4.pdf [file supp_g3.113.008680_FigureS4.pdf]

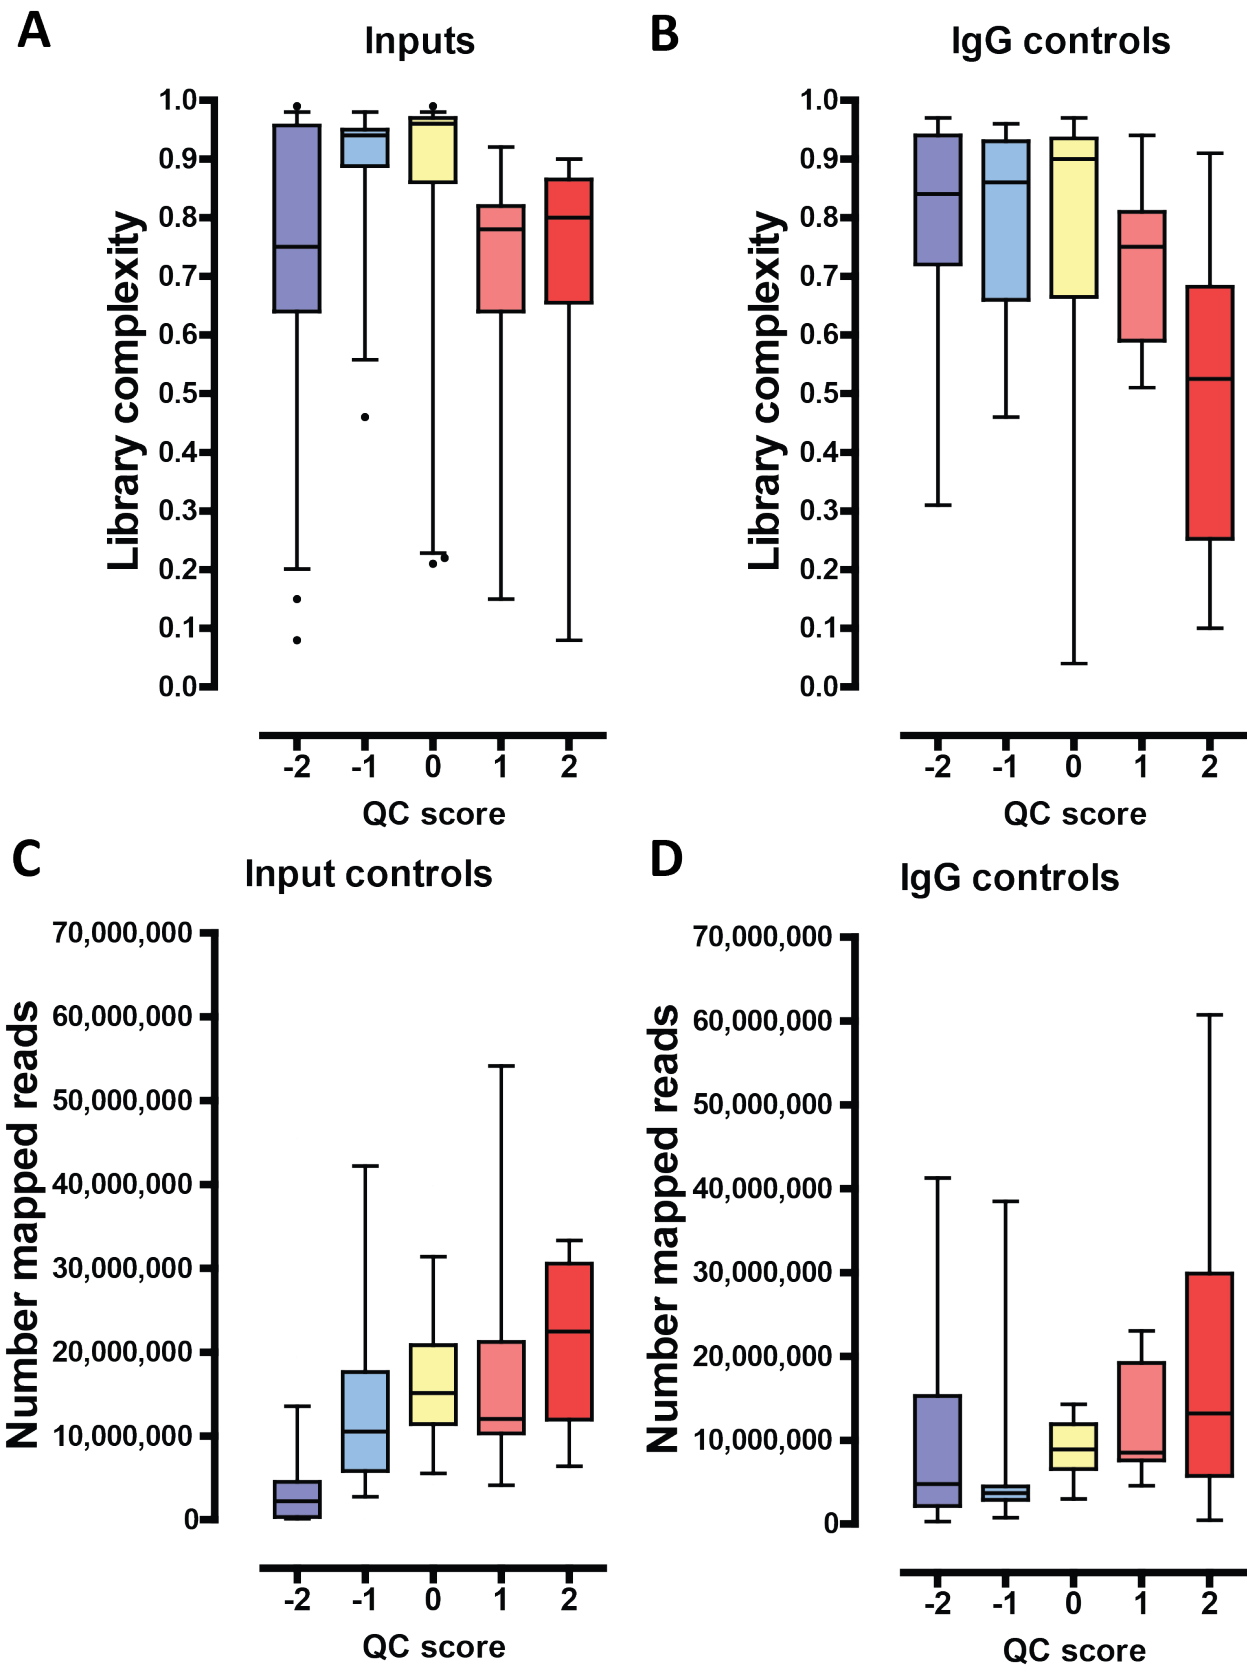

Figure S4: Distribution of library complexity values and sequencing depth for Input and IgG control datasets divided by QC scores. (A,B) Library complexity. (C,D) Sequencing depth.
