# Supplementary material for: Large-Scale Quality Analysis of Published ChIP-seq Data
Source: PubMed Central journal article supplement (PMC3931556; doi:10.1534/g3.113.008680), 2013-12-17
Supplement: supp_g3.113.008680_TableS1.pdf [file supp_g3.113.008680_TableS1.pdf]

**Table S1: Dataset QC evaluation and mapping statistics.** A direct link to the GEO entry is provided in the “Source” field

| Source                  | Species | Library                                    | Complexity | NSC   |      |    | RSC |    |    | QC               |                  |                  | Mapped reads | Type | Should exhibit read clustering |
|-------------------------|---------|--------------------------------------------|------------|-------|------|----|-----|----|----|------------------|------------------|------------------|--------------|------|--------------------------------|
|                         |         |                                            |            | N     | S    | C  | R   | S  | C  | Ave. Read Length | Max. Read Length | Min. Read Length |              |      |                                |
| Marson et al. 2008      | mouse   | Nanog-mES-rep1                             | 0.94       | 4.37  | 1.67 | 2  | 26  | 26 | 26 | 4,305,381        | ChIP             | yes              |              |      |                                |
| Marson et al. 2008      | mouse   | Nanog-mES-rep2                             | 0.94       | 4.32  | 1.67 | 2  | 26  | 26 | 26 | 4,396,374        | ChIP             | yes              |              |      |                                |
| Marson et al. 2008      | mouse   | oct4-mES-rep1                              | 0.95       | 6.54  | 0.34 | -1 | 26  | 26 | 26 | 4,341,147        | ChIP             | yes              |              |      |                                |
| Marson et al. 2008      | mouse   | sox2-mES-rep1                              | 0.96       | 4.03  | 1.21 | 1  | 26  | 26 | 26 | 4,033,101        | ChIP             | yes              |              |      |                                |
| Marson et al. 2008      | mouse   | sox2-mES-rep2                              | 0.97       | 4.07  | 1.19 | 1  | 26  | 26 | 26 | 3,287,130        | ChIP             | yes              |              |      |                                |
| Marson et al. 2008      | mouse   | suz12-mES-rep1                             | 0.97       | 1.63  | 0.15 | -2 | 26  | 26 | 26 | 3,624,473        | ChIP             | yes              |              |      |                                |
| Marson et al. 2008      | mouse   | suz12-rep2-1                               | 0.98       | 1.24  | 0.41 | -1 | 26  | 26 | 26 | 207,308          | ChIP             | yes              |              |      |                                |
| Marson et al. 2008      | mouse   | Tcf3-mES-rep1                              | 0.96       | 3     | 0.72 | 0  | 26  | 26 | 26 | 5,247,274        | ChIP             | yes              |              |      |                                |
| Marson et al. 2008      | mouse   | Tcf3-mES-rep2                              | 0.96       | 2.96  | 0.66 | 0  | 26  | 26 | 26 | 5,388,916        | ChIP             | yes              |              |      |                                |
| Marson et al. 2008      | mouse   | WCE-mES-rep1                               | 0.94       | 1.37  | 0.2  | -2 | 26  | 26 | 26 | 1,507,157        | Input            | no               |              |      |                                |
| Marson et al. 2008      | mouse   | WCE-mES-rep2                               | 0.9        | 1.35  | 0.21 | -2 | 26  | 26 | 26 | 3,770,502        | Input            | no               |              |      |                                |
| Chen et al. 2008        | mouse   | ES-c-Myc                                   | 0.86       | 1.51  | 0.48 | -1 | 26  | 26 | 26 | 11,714,595       | ChIP             | yes              |              |      |                                |
| Chen et al. 2008        | mouse   | ES-E2f1                                    | 0.84       | 1.43  | 0.92 | 0  | 26  | 26 | 26 | 13,374,901       | ChIP             | yes              |              |      |                                |
| Chen et al. 2008        | mouse   | ES-Esrrb                                   | 0.88       | 4.5   | 1.69 | 2  | 26  | 26 | 26 | 7,982,162        | ChIP             | yes              |              |      |                                |
| Chen et al. 2008        | mouse   | ES-GFP                                     | 0.82       | 1.26  | 0.15 | -2 | 26  | 26 | 26 | 7,520,858        | IgG              | no               |              |      |                                |
| Chen et al. 2008        | mouse   | ES-Klf4                                    | 0.41       | 1.96  | 0.62 | 0  | 36  | 36 | 36 | 368,908          | ChIP             | yes              |              |      |                                |
| Chen et al. 2008        | mouse   | ES-Nanog                                   | 0.81       | 3158  | 356  | 2  | 26  | 26 | 26 | 9,166,834        | ChIP             | yes              |              |      |                                |
| Chen et al. 2008        | mouse   | ES-n-Myc                                   | 0.79       | 1.74  | 0.41 | -1 | 26  | 26 | 26 | 10,099,160       | ChIP             | yes              |              |      |                                |
| Chen et al. 2008        | mouse   | ES-Oct4                                    | 0.59       | 1.61  | 0.46 | -1 | 36  | 36 | 36 | 139,512          | ChIP             | yes              |              |      |                                |
| Chen et al. 2008        | mouse   | ES-p300                                    | 0.77       | 1.26  | 0.23 | -2 | 26  | 26 | 26 | 9,396,456        | ChIP             | yes              |              |      |                                |
| Chen et al. 2008        | mouse   | ES-Smad1                                   | 0.96       | 3074  | 298  | 2  | 26  | 26 | 26 | 9,681,328        | ChIP             | yes              |              |      |                                |
| Chen et al. 2008        | mouse   | ES-Sox2                                    | 0.86       | 1.94  | 0.62 | 0  | 26  | 26 | 26 | 12,489,175       | ChIP             | yes              |              |      |                                |
| Chen et al. 2008        | mouse   | ES-STAT3                                   | 0.77       | 1.68  | 0.38 | -1 | 26  | 26 | 26 | 8,384,452        | ChIP             | yes              |              |      |                                |
| Chen et al. 2008        | mouse   | ES-Suz12                                   | 0.87       | 1.21  | 0.27 | -1 | 26  | 26 | 26 | 12,378,715       | ChIP             | yes              |              |      |                                |
| Chen et al. 2008        | mouse   | ES-Tcfcp2l1                                | 0.81       | 13.53 | 2.42 | 2  | 26  | 26 | 26 | 8,800,970        | ChIP             | yes              |              |      |                                |
| Chen et al. 2008        | mouse   | ES-Zfx                                     | 0.92       | 1.9   | 0.71 | 0  | 31  | 31 | 31 | 9,543,774        | ChIP             | yes              |              |      |                                |
| Kwon et al. 2009        | mouse   | IgG-post-IL21-in-B-cells                   | 0.84       | 1.4   | 0.47 | -1 | 25  | 25 | 25 | 2,915,090        | IgG              | no               |              |      |                                |
| Kwon et al. 2009        | mouse   | IgG-post-IL6                               | 0.88       | 1.49  | 0.36 | -1 | 25  | 25 | 25 | 2,129,448        | IgG              | no               |              |      |                                |
| Kwon et al. 2009        | mouse   | IgG-post-IL21-dup                          | 0.89       | 1.26  | 0.34 | -1 | 25  | 25 | 25 | 4,286,349        | IgG              | no               |              |      |                                |
| Kwon et al. 2009        | mouse   | IgG-post-IL21-in-B-cells                   | 0.91       | 1.33  | 0.52 | 0  | 25  | 25 | 25 | 2,993,063        | IgG              | no               |              |      |                                |
| Kwon et al. 2009        | mouse   | IgG-post-IL21-in-WT-quar                   | 0.74       | 1.89  | 0.7  | 0  | 25  | 25 | 25 | 7,228,784        | IgG              | no               |              |      |                                |
| Kwon et al. 2009        | mouse   | IgG-post-IL21-ter                          | 0.92       | 1.35  | 0.11 | -2 | 25  | 25 | 25 | 3,080,974        | IgG              | no               |              |      |                                |
| Kwon et al. 2009        | mouse   | IgG-post-IL2-dup                           | 0.86       | 1.31  | 0.4  | -1 | 25  | 25 | 25 | 3,406,531        | IgG              | no               |              |      |                                |
| Kwon et al. 2009        | mouse   | IgG-post-IL6                               | 0.84       | 1.31  | 0.35 | -1 | 25  | 25 | 25 | 4,247,181        | IgG              | no               |              |      |                                |
| Kwon et al. 2009        | mouse   | IRF4-post-IL21-dup-seq-1                   | 0.86       | 2.08  | 0.89 | 0  | 25  | 25 | 25 | 3,295,774        | ChIP             | yes              |              |      |                                |
| Kwon et al. 2009        | mouse   | IRF4-post-IL21-dup-seq-2                   | 0.66       | 2.21  | 0.92 | 0  | 25  | 25 | 25 | 5,496,827        | ChIP             | yes              |              |      |                                |
| Kwon et al. 2009        | mouse   | IRF4-post-IL21-in-IRF4-KO-mice             | 0.94       | 1.9   | 0.66 | 0  | 25  | 25 | 25 | 3,613,839        | ChIP             | no               |              |      |                                |
| Kwon et al. 2009        | mouse   | IRF4-post-IL21-seq-1                       | 0.9        | 1.88  | 0.72 | 0  | 25  | 25 | 25 | 3,560,575        | ChIP             | yes              |              |      |                                |
| Kwon et al. 2009        | mouse   | IRF4-post-IL21-seq-2                       | 0.93       | 2.14  | 0.73 | 0  | 25  | 25 | 25 | 1,273,441        | ChIP             | yes              |              |      |                                |
| Kwon et al. 2009        | mouse   | IRF4-pre-IL21-dup-seq-1                    | 0.89       | 1.76  | 0.7  | 0  | 25  | 25 | 25 | 3,996,341        | ChIP             | yes              |              |      |                                |
| Kwon et al. 2009        | mouse   | IRF4-pre-IL21-dup-seq-2                    | 0.9        | 1.83  | 0.72 | 0  | 25  | 25 | 25 | 3,308,064        | ChIP             | yes              |              |      |                                |
| Kwon et al. 2009        | mouse   | IRF4-pre-IL21-in-IRF4-KO-mice              | 0.81       | 1.5   | 0.42 | -1 | 25  | 25 | 25 | 5,741,089        | ChIP             | no               |              |      |                                |
| Kwon et al. 2009        | mouse   | IRF4-pre-IL21-seq-1                        | 0.89       | 2.19  | 0.9  | 0  | 25  | 25 | 25 | 2,882,656        | ChIP             | yes              |              |      |                                |
| Kwon et al. 2009        | mouse   | IRF4-pre-IL21-seq-2                        | 0.73       | 2.44  | 0.84 | 0  | 25  | 25 | 25 | 4,304,206        | ChIP             | yes              |              |      |                                |
| Kwon et al. 2009        | mouse   | STAT3-post-IL21-dup-seq-1                  | 0.93       | 1.47  | 0.44 | -1 | 25  | 25 | 25 | 266,685          | ChIP             | yes              |              |      |                                |
| Kwon et al. 2009        | mouse   | STAT3-post-IL21-dup-seq-2                  | 0.89       | 1.47  | 0.46 | -1 | 25  | 25 | 25 | 1,818,900        | ChIP             | yes              |              |      |                                |
| Kwon et al. 2009        | mouse   | STAT3-post-IL21-in-IRF4-KO-mice            | 0.79       | 1.42  | 0.28 | -1 | 25  | 25 | 25 | 5,334,084        | ChIP             | unknown          |              |      |                                |
| Kwon et al. 2009        | mouse   | STAT3-post-IL21-in-IRF4-KO-mice-second-exp | 0.81       | 1.52  | 0.52 | 0  | 25  | 25 | 25 | 5,744,414        | ChIP             | unknown          |              |      |                                |
| Kwon et al. 2009        | mouse   | STAT3-post-IL21-in-IRF4-KO-mice-third-exp  | 0.82       | 1.5   | 0.48 | -1 | 25  | 25 | 25 | 4,041,874        | ChIP             | unknown          |              |      |                                |
| Kwon et al. 2009        | mouse   | STAT3-post-IL21-in-WT-cinq                 | 0.77       | 1.87  | 0.58 | 0  | 25  | 25 | 25 | 5,281,605        | ChIP             | yes              |              |      |                                |
| Kwon et al. 2009        | mouse   | STAT3-post-IL21-in-WT-quar                 | 0.76       | 1.88  | 0.63 | 0  | 25  | 25 | 25 | 5,450,390        | ChIP             | yes              |              |      |                                |
| Kwon et al. 2009        | mouse   | STAT3-post-IL21-in-WT-ter                  | 0.85       | 1.46  | 0.43 | -1 | 25  | 25 | 25 | 3,416,726        | ChIP             | yes              |              |      |                                |
| Kwon et al. 2009        | mouse   | STAT3-post-IL21-seq-1                      | 0.88       | 2.75  | 0.86 | 0  | 25  | 25 | 25 | 3,446,457        | ChIP             | yes              |              |      |                                |
| Kwon et al. 2009        | mouse   | STAT3-post-IL21-seq-2                      | 0.84       | 2.89  | 0.81 | 0  | 25  | 25 | 25 | 3,340,925        | ChIP             | yes              |              |      |                                |
| Kwon et al. 2009        | mouse   | STAT3-pre-IL21-dup-seq-1                   | 0.82       | 1.37  | 0.41 | -1 | 25  | 25 | 25 | 3,736,863        | ChIP             | unknown          |              |      |                                |
| Kwon et al. 2009        | mouse   | STAT3-pre-IL21-dup-seq-2                   | 0.86       | 1.42  | 0.4  | -1 | 25  | 25 | 25 | 2,709,584        | ChIP             | unknown          |              |      |                                |
| Kwon et al. 2009        | mouse   | STAT3-pre-IL21-in-IRF4-KO-mice-first-exp   | 0.85       | 1.56  | 0.45 | -1 | 25  | 25 | 25 | 3,709,343        | ChIP             | unknown          |              |      |                                |
| Kwon et al. 2009        | mouse   | STAT3-pre-IL21-in-IRF4-KO-mice-second-exp  | 0.79       | 1.83  | 0.71 | 0  | 25  | 25 | 25 | 6,924,787        | ChIP             | unknown          |              |      |                                |
| Kwon et al. 2009        | mouse   | STAT3-pre-IL21-in-WT-4th-experiment        | 0.82       | 1.51  | 0.37 | -1 | 25  | 25 | 25 | 4,257,111        | ChIP             | unknown          |              |      |                                |
| Kwon et al. 2009        | mouse   | STAT3-pre-IL21-in-WT-ter                   | 0.81       | 1.41  | 0.14 | -2 | 25  | 25 | 25 | 3,395,506        | ChIP             | unknown          |              |      |                                |
| Kwon et al. 2009        | mouse   | STAT3-pre-IL21-seq-1                       | 0.78       | 3.1   | 0.76 | 0  | 25  | 25 | 25 | 3,700,560        | ChIP             | unknown          |              |      |                                |
| Kwon et al. 2009        | mouse   | STAT3-pre-IL21-seq-2                       | 0.76       | 3.1   | 0.67 | 0  | 25  | 25 | 25 | 3,667,278        | ChIP             | unknown          |              |      |                                |
| Hollenhorst et al. 2009 | human   | Jurkat-CBP-1                               | 0.86       | 2.22  | 1.38 | 1  | 36  | 36 | 36 | 9,275,556        | ChIP             | yes              |              |      |                                |

*Continued on next page*

Table S1 – *Continued from previous page*

| Source                                                 | Species | Library                     | Complexity | NSC   |       |    | RSC              |                  |                  | QC         |       |         | Mapped reads | Type | Should exhibit read clustering |
|--------------------------------------------------------|---------|-----------------------------|------------|-------|-------|----|------------------|------------------|------------------|------------|-------|---------|--------------|------|--------------------------------|
|                                                        |         |                             |            | NSC   | RSC   | QC | Ave. Read Length | Max. Read Length | Min. Read Length |            |       |         |              |      |                                |
| Hollenhorst et al. 2009                                | human   | Jurkat-ETS1-1               | 0.85       | 2.41  | 2.58  | 2  | 26               | 26               | 26               | 7,562,377  | ChIP  | yes     |              |      |                                |
| Hollenhorst et al. 2009                                | human   | Jurkat-Input-1              | 0.93       | 1.16  | 0.15  | -2 | 26               | 26               | 26               | 15,389,799 | Input | no      |              |      |                                |
| Hollenhorst et al. 2009                                | human   | Jurkat-RUNX-1               | 0.63       | 2.55  | 0.61  | 0  | 36               | 36               | 36               | 10,337,694 | ChIP  | yes     |              |      |                                |
| Han et al. 2010                                        | mouse   | mESC-Input                  | 0.96       | 1.17  | 0.18  | -2 | 37               | 37               | 37               | 9,567,449  | ChIP  | no      |              |      |                                |
| Han et al. 2010                                        | mouse   | mESC-Tbx3                   | 0.92       | 1.46  | 0.29  | -1 | 35               | 35               | 35               | 7,526,549  | ChIP  | yes     |              |      |                                |
| Yu et al. 2009                                         | mouse   | MEL86-GATA1                 | 0.94       | 1.34  | 0.28  | -1 | 33.87            | 36               | 28               | 5,866,520  | ChIP  | yes     |              |      |                                |
| De et al. 2009                                         | mouse   | Macrophages-JMJD3           | 0.95       | 1.32  | 0.36  | -1 | 36               | 36               | 36               | 8,731,417  | ChIP  | yes     |              |      |                                |
| Yuan et al. 2009                                       | mouse   | mESC-ESET                   | 0.92       | 1.93  | 0.65  | 0  | 36               | 36               | 36               | 11,607,868 | ChIP  | yes     |              |      |                                |
| Bilodeau et al. 2009                                   | mouse   | mESC-SetDB1-rep-1           | 0.92       | 1.68  | 0.54  | 0  | 36               | 36               | 36               | 3,620,404  | ChIP  | yes     |              |      |                                |
| Bilodeau et al. 2009                                   | mouse   | mESC-SetDB1-rep-2           | 0.93       | 1.64  | 0.42  | -1 | 36               | 36               | 36               | 3,301,043  | ChIP  | yes     |              |      |                                |
| Bilodeau et al. 2009                                   | mouse   | mESC-SetDB1-rep-3           | 0.92       | 1.65  | 0.51  | 0  | 36               | 36               | 36               | 4,251,421  | ChIP  | yes     |              |      |                                |
| Bilodeau et al. 2009                                   | mouse   | mESC-WCE-mES-rep-1          | 0.94       | 1.38  | 0.31  | -1 | 36               | 36               | 36               | 3,966,359  | Input | no      |              |      |                                |
| Lister et al. 2009                                     | human   | hESC-NANOG-1a               | 0.65       | 18.86 | 4.47  | 2  | 36               | 36               | 36               | 3,701,686  | ChIP  | yes     |              |      |                                |
| Lister et al. 2009                                     | human   | hESC-NANOG-1b               | 0.61       | 17.44 | 4.43  | 2  | 36               | 36               | 36               | 4,523,040  | ChIP  | yes     |              |      |                                |
| Lister et al. 2009                                     | human   | hESC-SOX2-1a                | 0.82       | 9.01  | 4.94  | 2  | 36               | 36               | 36               | 4,591,769  | ChIP  | yes     |              |      |                                |
| Lister et al. 2009                                     | human   | hESC-KLF4-1a                | 0.32       | 46.06 | 24.39 | 2  | 36               | 36               | 36               | 810,796    | ChIP  | yes     |              |      |                                |
| Lister et al. 2009                                     | human   | hESC-MYC-1a                 | 0.58       | 4.15  | 2.02  | 2  | 36               | 36               | 36               | 2,391,782  | ChIP  | yes     |              |      |                                |
| Lister et al. 2009                                     | human   | hESC-Oct4-1a                | 0.98       | 2.46  | 1.04  | 1  | 36               | 36               | 36               | 574,662    | ChIP  | yes     |              |      |                                |
| Lister et al. 2009                                     | human   | hESC-Oct4-2a                | 0.98       | 4.37  | 1.81  | 2  | 36               | 36               | 36               | 151,346    | ChIP  | yes     |              |      |                                |
| Lister et al. 2009                                     | human   | hESC-P300-1a                | 0.57       | 7.51  | 2.52  | 2  | 36               | 36               | 36               | 3,490,165  | ChIP  | yes     |              |      |                                |
| Lister et al. 2009                                     | human   | hESC-TAFII-1a               | 0.64       | 2.93  | 1.96  | 2  | 36               | 36               | 36               | 4,031,316  | ChIP  | yes     |              |      |                                |
| Lister et al. 2009                                     | human   | hESC-TAFII-1b               | 0.67       | 2.9   | 1.72  | 2  | 36               | 36               | 36               | 3,507,401  | ChIP  | yes     |              |      |                                |
| Nishiyama et al. 2009                                  | mouse   | mESC-Cdx2                   | 0.94       | 1.14  | 0.32  | -1 | 36               | 36               | 36               | 7,347,351  | ChIP  | yes     |              |      |                                |
| Cheng et al. 2009                                      | mouse   | G1E-ER4-GATA1               | 0.96       | 1.75  | 1.2   | 1  | 36               | 36               | 36               | 24,281,091 | ChIP  | yes     |              |      |                                |
| Cheng et al. 2009                                      | mouse   | G1E-ER4-Input               | 0.97       | 1.28  | 0.58  | 0  | 36               | 36               | 36               | 15,990,494 | Input | no      |              |      |                                |
| Wilson et al. 2009                                     | mouse   | HPC-7-Scl-1                 | 0.95       | 1.86  | 0.88  | 0  | 45               | 45               | 45               | 5,563,933  | ChIP  | yes     |              |      |                                |
| Wilson et al. 2009                                     | mouse   | HPC-7-Scl-2                 | 0.96       | 1.83  | 0.47  | -1 | 36               | 36               | 36               | 3,637,766  | ChIP  | yes     |              |      |                                |
| Robertson et al. 2007                                  | human   | HeLaS3-IFNgamma-1-STAT1     | 0.86       | 4.41  | 1.1   | 1  | 27               | 27               | 27               | 693,473    | ChIP  | yes     |              |      |                                |
| Robertson et al. 2007                                  | human   | HeLaS3-IFNgamma-2-STAT1     | 0.85       | 3.67  | 1.04  | 1  | 27               | 27               | 27               | 663,874    | ChIP  | yes     |              |      |                                |
| Robertson et al. 2007                                  | human   | HeLaS3-IFNgamma-3-STAT1     | 0.94       | 4.07  | 1.58  | 2  | 36               | 36               | 36               | 3,079,284  | ChIP  | yes     |              |      |                                |
| Robertson et al. 2007                                  | human   | HeLaS3-IFNgamma-4-STAT1     | 0.94       | 3.97  | 1.59  | 2  | 27               | 27               | 27               | 2,176,985  | ChIP  | yes     |              |      |                                |
| Robertson et al. 2007                                  | human   | HeLaS3-IFNgamma-5-STAT1     | 0.95       | 4     | 1.96  | 2  | 27               | 27               | 27               | 2,808,038  | ChIP  | yes     |              |      |                                |
| Robertson et al. 2007                                  | human   | HeLaS3-IFNgamma-6-STAT1     | 0.95       | 4.17  | 1.95  | 2  | 27               | 27               | 27               | 2,718,185  | ChIP  | yes     |              |      |                                |
| Robertson et al. 2007                                  | human   | HeLaS3-unstimulated-1-STAT1 | 0.86       | 1.98  | 0.33  | -1 | 27               | 27               | 27               | 478,619    | ChIP  | unknown |              |      |                                |
| Robertson et al. 2007                                  | human   | HeLaS3-unstimulated-2-STAT1 | 0.84       | 2.6   | 0.34  | -1 | 27               | 27               | 27               | 500,638    | ChIP  | unknown |              |      |                                |
| Robertson et al. 2007                                  | human   | HeLaS3-unstimulated-3-STAT1 | 0.82       | 2.2   | 0.29  | -1 | 27               | 27               | 27               | 496,979    | ChIP  | unknown |              |      |                                |
| Robertson et al. 2007                                  | human   | HeLaS3-unstimulated-4-STAT1 | 0.92       | 1.45  | 0.23  | -2 | 36               | 36               | 36               | 2,746,723  | ChIP  | unknown |              |      |                                |
| Robertson et al. 2007                                  | human   | HeLaS3-unstimulated-5-STAT1 | 0.93       | 2.17  | 0.3   | -1 | 27               | 27               | 27               | 1,447,320  | ChIP  | unknown |              |      |                                |
| Robertson et al. 2007                                  | human   | HeLaS3-unstimulated-6-STAT1 | 0.93       | 2.05  | 0.28  | -1 | 27               | 27               | 27               | 1,425,741  | ChIP  | unknown |              |      |                                |
| Robertson et al. 2007                                  | human   | HeLaS3-unstimulated-7-STAT1 | 0.95       | 1.47  | 0.34  | -1 | 27               | 27               | 27               | 2,452,058  | ChIP  | unknown |              |      |                                |
| Welboren et al. 2009                                   | human   | MCF7-E2-ERa                 | 0.7        | 12.72 | 1.74  | 2  | 32               | 32               | 32               | 9,428,987  | ChIP  | yes     |              |      |                                |
| Welboren et al. 2009                                   | human   | MCF7-Fulvestrant-ERa        | 0.83       | 5.17  | 1.22  | 1  | 32               | 32               | 32               | 6,243,484  | ChIP  | yes     |              |      |                                |
| Welboren et al. 2009                                   | human   | MCF7-mock-treated-ERa       | 0.67       | 6.52  | 2.9   | 2  | 32               | 32               | 32               | 1,722,599  | ChIP  | unknown |              |      |                                |
| Welboren et al. 2009                                   | human   | MCF7-Tamoxifen-ERa          | 0.82       | 8.86  | 1.55  | 2  | 32               | 32               | 32               | 5,836,314  | ChIP  | yes     |              |      |                                |
| Visel et al. 2009; Gotea et al. 2010; Blow et al. 2010 | mouse   | Forebrain-p300              | 0.57       | 1.72  | 0.15  | -2 | 36.32            | 38               | 36               | 4,842,793  | ChIP  | yes     |              |      |                                |
| Visel et al. 2009; Gotea et al. 2010; Blow et al. 2010 | mouse   | Limb-p300                   | 0.73       | 2.16  | 0.15  | -2 | 36               | 36               | 35               | 2,209,017  | ChIP  | yes     |              |      |                                |
| Visel et al. 2009; Gotea et al. 2010; Blow et al. 2010 | mouse   | Midbrain-p300               | 0.49       | 1.97  | 0.18  | -2 | 36.25            | 38               | 36               | 5,942,773  | ChIP  | yes     |              |      |                                |
| Ho et al. 2009                                         | mouse   | mESC-Brg-J1                 | 0.86       | 1.25  | 0.49  | -1 | 25               | 25               | 25               | 12,146,582 | ChIP  | yes     |              |      |                                |
| Ho et al. 2009                                         | mouse   | mESC-IgG                    | 0.91       | 1.17  | 0.51  | 0  | 25               | 25               | 25               | 14,118,667 | IgG   | no      |              |      |                                |
| Cuddapah et al. 2009                                   | human   | CD4+-CTCF                   | 0.88       | 31.05 | 2.29  | 2  | 24               | 24               | 24               | 2,942,119  | ChIP  | yes     |              |      |                                |
| Cuddapah et al. 2009                                   | human   | HeLa-CTCF                   | 0.93       | 5.22  | 1.29  | 1  | 24               | 24               | 24               | 3,294,793  | ChIP  | yes     |              |      |                                |
| Cuddapah et al. 2009                                   | human   | Jurkat-CTCF                 | 0.91       | 4.22  | 1.01  | 1  | 25               | 25               | 25               | 4,367,791  | ChIP  | yes     |              |      |                                |
| Krebs et al. 2010                                      | mouse   | mESC-LUZP1                  | 0.62       | 16.78 | 4.02  | 2  | 36               | 36               | 36               | 7,021,192  | ChIP  | yes     |              |      |                                |
| Krebs et al. 2010                                      | mouse   | mESC-mock                   | 0.37       | 16.17 | 3.94  | 2  | 36               | 36               | 36               | 7,446,009  | IgG   | no      |              |      |                                |
| Corbo et al. 2010                                      | mouse   | NRL-KO-Crx-Rep1             | 0.69       | 1.81  | 1.18  | 1  | 36               | 36               | 36               | 12,527,332 | ChIP  | yes     |              |      |                                |
| Corbo et al. 2010                                      | mouse   | NRL-KO-Crx-Rep2             | 0.8        | 1.8   | 1.24  | 1  | 36               | 36               | 36               | 10,488,445 | ChIP  | yes     |              |      |                                |
| Corbo et al. 2010                                      | mouse   | NRL-KO-IgG-Rep1             | 0.75       | 1.58  | 0.9   | 0  | 36               | 36               | 36               | 12,160,830 | IgG   | no      |              |      |                                |
| Corbo et al. 2010                                      | mouse   | NRL-KO-IgG-Rep2             | 0.69       | 2.43  | 1.51  | 2  | 36               | 36               | 36               | 11,005,528 | IgG   | no      |              |      |                                |
| Corbo et al. 2010                                      | mouse   | WT-Crx-Rep1                 | 0.89       | 3.69  | 0.63  | 0  | 36               | 36               | 36               | 4,302,798  | ChIP  | yes     |              |      |                                |
| Corbo et al. 2010                                      | mouse   | WT-Crx-Rep2                 | 0.9        | 4.07  | 0.89  | 0  | 36               | 36               | 36               | 4,308,655  | ChIP  | yes     |              |      |                                |
| Corbo et al. 2010                                      | mouse   | WT-IgG-Rep1                 | 0.92       | 2.53  | 0.42  | -1 | 36               | 36               | 36               | 3,707,696  | IgG   | no      |              |      |                                |
| Ramagopalan et al. 2010                                | human   | GM10855-Input               | 0.94       | 1.16  | 0.27  | -1 | 36               | 36               | 36               | 11,412,903 | Input | no      |              |      |                                |
| Ramagopalan et al. 2010                                | human   | GM10855-unstimulated-rep1   | 0.87       | 1.41  | 0.56  | 0  | 36               | 36               | 36               | 13,520,376 | ChIP  | unknown |              |      |                                |
| Ramagopalan et al. 2010                                | human   | GM10855-unstimulated-rep2   | 0.88       | 1.47  | 0.55  | 0  | 36               | 36               | 36               | 10,791,763 | ChIP  | unknown |              |      |                                |
| Ramagopalan et al. 2010                                | human   | GM10855-vitaminD-rep1       | 0.89       | 1.76  | 0.83  | 0  | 36               | 36               | 36               | 13,970,589 | ChIP  | yes     |              |      |                                |
| Ramagopalan et al. 2010                                | human   | GM10855-vitaminD-rep2       | 0.89       | 1.67  | 0.82  | 0  | 36               | 36               | 36               | 14,642,572 | ChIP  | yes     |              |      |                                |
| Ramagopalan et al. 2010                                | human   | GM10861-Input               | 0.95       | 1.19  | 0.35  | -1 | 36               | 36               | 36               | 11,404,257 | Input | no      |              |      |                                |
| Ramagopalan et al. 2010                                | human   | GM10861-unstimulated-rep1   | 0.93       | 1.39  | 0.56  | 0  | 36               | 36               | 36               | 10,157,583 | ChIP  | unknown |              |      |                                |

*Continued on next page*

Table S1 – Continued from previous page

| Source                  | Species | Library                                | Complexity | NSC   | RSC  | QC | Ave. Read Length | Max. Read Length | Min. Read Length | Mapped reads | Type  | Should exhibit read clustering |
|-------------------------|---------|----------------------------------------|------------|-------|------|----|------------------|------------------|------------------|--------------|-------|--------------------------------|
| Ramagopalan et al. 2010 | human   | GM10861-unstimulated-rep2              | 0.93       | 1.52  | 0.67 | 0  | 36               | 36               | 36               | 7,922,208    | ChIP  | unknown                        |
| Ramagopalan et al. 2010 | human   | GM10861-vitaminD-rep1                  | 0.92       | 1.88  | 0.95 | 0  | 36               | 36               | 36               | 10,649,722   | ChIP  | yes                            |
| Ramagopalan et al. 2010 | human   | GM10861-vitaminD-rep2                  | 0.93       | 1.88  | 0.95 | 0  | 36               | 36               | 36               | 11,754,302   | ChIP  | yes                            |
| Wei et al. 2010         | mouse   | Th1-STAT4-KO-STAT4                     | 0.84       | 2.05  | 1.25 | 1  | 36               | 36               | 36               | 9,339,036    | ChIP  | no                             |
| Wei et al. 2010         | mouse   | Th1-WT-STAT4                           | 0.88       | 7.69  | 2.19 | 2  | 36               | 36               | 36               | 10,525,607   | ChIP  | yes                            |
| Wei et al. 2010         | mouse   | Th2-Normal-Rabbit-Serum                | 0.75       | 2.42  | 1.31 | 1  | 36               | 36               | 36               | 7,610,146    | IgG   | no                             |
| Wei et al. 2010         | mouse   | Th2-STAT6-KO-STAT6                     | 0.89       | 2.38  | 1.37 | 1  | 36               | 36               | 36               | 9,734,600    | ChIP  | no                             |
| Wei et al. 2010         | mouse   | Th2-WT-STAT6                           | 0.83       | 6.45  | 1.62 | 2  | 36               | 36               | 36               | 9,139,067    | ChIP  | yes                            |
| Schnetz et al. 2010     | mouse   | mES-CHD7                               | 0.91       | 1.56  | 0.55 | 0  | 37               | 37               | 37               | 8,269,486    | ChIP  | yes                            |
| Schnetz et al. 2010     | mouse   | mES-p300                               | 0.96       | 1.35  | 0.73 | 0  | 37               | 37               | 37               | 17,677,307   | ChIP  | yes                            |
| GSE22303                | mouse   | mES-B2-TBP                             | 0.92       | 2.43  | 1.21 | 1  | 36               | 36               | 36               | 18,683,322   | ChIP  | yes                            |
| GSE22303                | mouse   | mES-B6-TBP                             | 0.91       | 1.94  | 0.73 | 0  | 26               | 26               | 26               | 3,617,586    | ChIP  | yes                            |
| Lin et al. 2010         | mouse   | A12-E2A-6h-E47ER                       | 0.93       | 3.41  | 0.61 | 0  | 36               | 36               | 36               | 2,776,323    | ChIP  | yes                            |
| Lin et al. 2010         | mouse   | E2AKO-E2A-1h-E47ER                     | 0.68       | 9.12  | 1.13 | 1  | 36               | 36               | 36               | 5,948,823    | ChIP  | yes                            |
| Lin et al. 2010         | mouse   | E2AKO-E2A-6h-E47ER                     | 0.96       | 4.34  | 0.59 | 0  | 36               | 36               | 36               | 2,196,108    | ChIP  | yes                            |
| Lin et al. 2010         | mouse   | EBFKO-E2A                              | 0.92       | 1.72  | 0.53 | 0  | 36               | 36               | 36               | 9,159,853    | ChIP  | yes                            |
| Lin et al. 2010         | mouse   | Input2                                 | 0.93       | 1.15  | 0.11 | -2 | 36               | 36               | 36               | 10,675,120   | Input | no                             |
| Lin et al. 2010         | mouse   | RAG1KO-CTCF                            | 0.91       | 15.22 | 2.31 | 2  | 36               | 36               | 36               | 4,804,275    | ChIP  | yes                            |
| Lin et al. 2010         | mouse   | RAG1KO-E2A                             | 0.85       | 4.13  | 1.39 | 1  | 30               | 36               | 25               | 7,601,861    | ChIP  | yes                            |
| Lin et al. 2010         | mouse   | RAG1KO-EBF                             | 0.81       | 10.08 | 1.23 | 1  | 36               | 36               | 36               | 2,935,481    | ChIP  | yes                            |
| Lin et al. 2010         | mouse   | RAG1KO-FOXO1-1                         | 0.91       | 6.82  | 1.06 | 1  | 36               | 36               | 36               | 5,093,578    | ChIP  | yes                            |
| Durant et al. 2010      | mouse   | Th17-Stat3 $\beta$ -fl-FoxP3-GFP-STAT3 | 0.81       | 2.61  | 1.36 | 1  | 36               | 36               | 36               | 12,871,479   | ChIP  | yes                            |
| Heinz et al. 2010       | mouse   | Bcell-input-ChIP-Seq                   | 0.68       | 1.75  | 0.12 | -2 | 36               | 36               | 36               | 11,410,688   | Input | no                             |
| Heinz et al. 2010       | mouse   | Bcell-Oct2-ChIP-Seq                    | 0.95       | 2.16  | 0.17 | -2 | 36               | 36               | 36               | 2,296,228    | ChIP  | yes                            |
| Heinz et al. 2010       | mouse   | Bcell-PU.1-ChIP-Seq                    | 0.92       | 5.56  | 4.62 | 2  | 36               | 36               | 36               | 8,207,220    | ChIP  | yes                            |
| Heinz et al. 2010       | mouse   | BirA-input-GW-ChIP-Seq                 | 0.96       | 1.24  | 0.54 | 0  | 23               | 23               | 23               | 2,263,641    | Input | no                             |
| Heinz et al. 2010       | mouse   | BLRP-LXRb-GW-ChIP-Seq                  | 0.8        | 2.02  | 0.68 | 0  | 22.45            | 25               | 22               | 9,426,604    | ChIP  | yes                            |
| Heinz et al. 2010       | mouse   | BMDM.LXRDKO-PU.1-ChIP-Seq              | 0.97       | 9.26  | 2.72 | 2  | 23               | 23               | 23               | 2,410,527    | ChIP  | yes                            |
| Heinz et al. 2010       | mouse   | BMDM-PU.1-ChIP-Seq                     | 0.93       | 10.78 | 1.97 | 2  | 36               | 36               | 36               | 9,617,221    | ChIP  | yes                            |
| Heinz et al. 2010       | mouse   | E2AKO-PU.1-bHLH-ER-ChIP-Seq            | 0.91       | 7.77  | 2.76 | 2  | 23               | 23               | 23               | 5,093,144    | ChIP  | yes                            |
| Heinz et al. 2010       | mouse   | E2AKO-PU.1-ChIP-Seq                    | 0.89       | 10.21 | 2.94 | 2  | 23               | 23               | 23               | 3,615,197    | ChIP  | yes                            |
| Heinz et al. 2010       | mouse   | E2AKO-PU.1-E2A-ER-ChIP-Seq             | 0.88       | 8.28  | 2.67 | 2  | 23               | 23               | 23               | 4,724,664    | ChIP  | yes                            |
| Heinz et al. 2010       | mouse   | EBFKO-PU.1-ChIP-Seq                    | 0.94       | 11.94 | 2.4  | 2  | 23               | 23               | 23               | 3,058,714    | ChIP  | yes                            |
| Heinz et al. 2010       | mouse   | PU.1KO-CEBPb-ChIP-Seq                  | 0.89       | 4.52  | 1.42 | 1  | 23               | 23               | 23               | 4,179,430    | ChIP  | yes                            |
| Heinz et al. 2010       | mouse   | PU.1KO-PU.1-ChIP-Seq                   | 0.88       | 2.79  | 0.53 | 0  | 23               | 23               | 23               | 4,615,899    | ChIP  | no                             |
| Heinz et al. 2010       | mouse   | PUER-CEBPb-0h-ChIP-Seq                 | 0.92       | 8.61  | 2.14 | 2  | 23               | 23               | 23               | 4,672,159    | ChIP  | yes                            |
| Heinz et al. 2010       | mouse   | PUER-CEBPb-1h-ChIP-Seq                 | 0.92       | 9.02  | 2.1  | 2  | 23               | 23               | 23               | 3,790,612    | ChIP  | yes                            |
| Heinz et al. 2010       | mouse   | PUER-CEBPb-24h-ChIP-Seq                | 0.89       | 10.77 | 2.54 | 2  | 23               | 23               | 23               | 4,625,986    | ChIP  | yes                            |
| Heinz et al. 2010       | mouse   | PUER-CEBPb-48h-ChIP-Seq                | 0.9        | 8.09  | 1.95 | 2  | 23               | 23               | 23               | 5,022,074    | ChIP  | yes                            |
| Heinz et al. 2010       | mouse   | PUER-CEBPb-6h-ChIP-Seq                 | 0.89       | 9.43  | 2.06 | 2  | 23               | 23               | 23               | 4,417,004    | ChIP  | yes                            |
| Heinz et al. 2010       | mouse   | PUER-PU.1-0h-ChIP-Seq                  | 0.94       | 4.68  | 0.57 | 0  | 23               | 23               | 23               | 2,053,953    | ChIP  | yes                            |
| Heinz et al. 2010       | mouse   | PUER-PU.1-1h-ChIP-Seq                  | 0.92       | 12.06 | 2.58 | 2  | 23               | 23               | 23               | 2,541,096    | ChIP  | yes                            |
| Heinz et al. 2010       | mouse   | PUER-PU.1-24h-ChIP-Seq                 | 0.9        | 18.69 | 2.85 | 2  | 23               | 23               | 23               | 3,403,839    | ChIP  | yes                            |
| Heinz et al. 2010       | mouse   | PUER-PU.1-48h-ChIP-Seq                 | 0.9        | 14.68 | 3.42 | 2  | 23               | 23               | 23               | 4,138,465    | ChIP  | yes                            |
| Heinz et al. 2010       | mouse   | PUER-PU.1-6h-ChIP-Seq                  | 0.9        | 16.62 | 2.83 | 2  | 23               | 23               | 23               | 3,477,600    | ChIP  | yes                            |
| Heinz et al. 2010       | mouse   | RAG1KO-PU.1-ChIP-Seq                   | 0.86       | 12.16 | 2.26 | 2  | 23               | 23               | 23               | 6,302,473    | ChIP  | yes                            |
| Heinz et al. 2010       | mouse   | ThioMac-CEBPb-ChIP-Seq                 | 0.92       | 5.55  | 2.96 | 2  | 23               | 23               | 23               | 7,067,160    | ChIP  | yes                            |
| Heinz et al. 2010       | mouse   | ThioMac-input-ChIP-Seq                 | 0.93       | 1.25  | 0.11 | -2 | 23.67            | 25               | 22               | 5,491,097    | Input | no                             |
| Heinz et al. 2010       | mouse   | ThioMac-PU.1-ChIP-Seq                  | 0.97       | 5.1   | 3.4  | 2  | 23               | 23               | 23               | 5,289,667    | ChIP  | yes                            |
| Steger et al. 2010      | mouse   | 3T3-L1-0hr-CEBPb                       | 0.51       | 5.34  | 1.6  | 2  | 36               | 36               | 36               | 11,295,935   | ChIP  | yes                            |
| Steger et al. 2010      | mouse   | 3T3-L1-0hr-Input                       | 0.94       | 3.23  | 0.46 | -1 | 36               | 36               | 36               | 5,129,801    | Input | no                             |
| Steger et al. 2010      | mouse   | 3T3-L1-240hr-Input                     | 0.95       | 3.48  | 0.55 | 0  | 36               | 36               | 36               | 5,019,654    | Input | no                             |
| Steger et al. 2010      | mouse   | 3T3-L1-24hr-Input                      | 0.81       | 6.84  | 1.26 | 1  | 36               | 36               | 36               | 4,731,402    | Input | no                             |
| Steger et al. 2010      | mouse   | 3T3-L1-6hr-CEBPb                       | 0.87       | 3.05  | 1.09 | 1  | 36               | 36               | 36               | 10,746,117   | ChIP  | yes                            |
| Steger et al. 2010      | mouse   | 3T3-L1-6hr-GR                          | 0.86       | 1.79  | 0.75 | 0  | 36               | 36               | 36               | 10,761,593   | ChIP  | yes                            |
| Steger et al. 2010      | mouse   | 3T3-L1-6hr-Input                       | 0.9        | 1.4   | 0.56 | 0  | 36               | 36               | 36               | 11,352,790   | Input | no                             |
| GSE21916                | human   | H9-IgG                                 | 0.93       | 1.53  | 0.33 | -1 | 26               | 26               | 26               | 4,499,095    | IgG   | no                             |
| GSE21916                | human   | H9-Oct4-replicate-2                    | 0.97       | 1.97  | 0.83 | 0  | 36               | 36               | 36               | 4,556,649    | ChIP  | yes                            |
| GSE21916                | human   | H9-Oct4-technical-replicate-1          | 0.92       | 1.81  | 0.48 | -1 | 26               | 26               | 26               | 4,187,685    | ChIP  | yes                            |
| GSE21916                | human   | H9-Oct4-technical-replicate-2          | 0.95       | 1.85  | 0.6  | 0  | 36               | 36               | 36               | 4,119,980    | ChIP  | yes                            |
| Kassouf et al. 2010     | mouse   | RER-SCL                                | 0.72       | 1.94  | 0.91 | 0  | 36               | 36               | 36               | 5,208,895    | ChIP  | no                             |
| Kassouf et al. 2010     | mouse   | RER-SCL-no-AB                          | 0.51       | 9.5   | 1.38 | 1  | 36               | 36               | 36               | 4,571,728    | IgG   | no                             |
| Kassouf et al. 2010     | mouse   | WT-no-AB                               | 0.81       | 5.94  | 1.05 | 1  | 36               | 36               | 36               | 5,312,397    | IgG   | no                             |
| Kassouf et al. 2010     | mouse   | WT-SCL                                 | 0.68       | 2.77  | 1.4  | 1  | 36               | 36               | 36               | 4,154,252    | ChIP  | yes                            |
| MacIsaac et al. 2010    | mouse   | CEBPb-3T3-L1                           | 0.93       | 2.43  | 0.75 | 0  | 35               | 35               | 35               | 4,326,509    | ChIP  | yes                            |
| MacIsaac et al. 2010    | mouse   | CEBPb-liver                            | 0.9        | 14.08 | 2.03 | 2  | 35               | 35               | 35               | 4,595,713    | ChIP  | yes                            |
| MacIsaac et al. 2010    | mouse   | E2F4-liver                             | 0.92       | 16.44 | 2.26 | 2  | 35               | 35               | 35               | 2,214,727    | ChIP  | yes                            |
| MacIsaac et al. 2010    | mouse   | FOXA1-liver                            | 0.54       | 12.93 | 3.19 | 2  | 35               | 35               | 35               | 3,968,403    | ChIP  | yes                            |
| MacIsaac et al. 2010    | mouse   | FOXA2-liver                            | 0.95       | 6.49  | 1.99 | 2  | 35               | 35               | 35               | 6,593,622    | ChIP  | yes                            |
| MacIsaac et al. 2010    | mouse   | p300-3T3-L1                            | 0.96       | 1.74  | 0.77 | 0  | 35               | 35               | 35               | 3,575,940    | ChIP  | yes                            |
| MacIsaac et al. 2010    | mouse   | p300-liver                             | 0.95       | 6.6   | 2.79 | 2  | 35               | 35               | 35               | 4,718,264    | ChIP  | yes                            |

Continued on next page

Table S1 – Continued from previous page

| Source                   | Species | Library                                     | Complexity | NSC   | RSC  | QC | Ave. Read Length | Max. Read Length | Min. Read Length | Mapped reads | Type  | Should exhibit read clustering |
|--------------------------|---------|---------------------------------------------|------------|-------|------|----|------------------|------------------|------------------|--------------|-------|--------------------------------|
| MacIsaac et al. 2010     | mouse   | Sample-control-reads-3T3-L1                 | 0.29       | 1.46  | 0.47 | -1 | 35               | 35               | 35               | 2,767,084    | Input | no                             |
| MacIsaac et al. 2010     | mouse   | Sample-control-reads-cerebellum             | 0.93       | 1.9   | 0.52 | 0  | 35               | 35               | 35               | 5,139,906    | Input | no                             |
| MacIsaac et al. 2010     | mouse   | Sample-control-reads-liver                  | 0.64       | 23.8  | 2.7  | 2  | 35               | 35               | 35               | 5,270,015    | Input | no                             |
| Vivar et al. 2010        | human   | U2OS-ERb-Doxy-nonspecificAntibodyIgG-rep1   | 0.96       | 1.33  | 0.26 | -1 | 26               | 26               | 26               | 2,576,564    | IgG   | no                             |
| Vivar et al. 2010        | human   | U2OS-ERb-Doxy-specificAntibody-rep1         | 0.95       | 2.8   | 0.7  | 0  | 26               | 26               | 26               | 2,749,749    | ChIP  | yes                            |
| Vivar et al. 2010        | human   | U2OS-ERb-DoxyE2-nonspecificAntibodyIgG-rep1 | 0.95       | 1.43  | 0.31 | -1 | 26               | 26               | 26               | 2,880,960    | IgG   | no                             |
| Vivar et al. 2010        | human   | U2OS-ERb-DoxyE2-specificAntibody-rep1       | 0.95       | 6.1   | 1.13 | 1  | 26               | 26               | 26               | 2,638,244    | ChIP  | yes                            |
| Fortschegger et al. 2010 | human   | Input-DNA-Hs68+FBS                          | 0.97       | 1.32  | 0.27 | -1 | 40               | 40               | 40               | 8,279,525    | Input | no                             |
| Fortschegger et al. 2010 | human   | Input-DNA-Hs68-FBS                          | 0.97       | 1.34  | 0.3  | -1 | 40               | 40               | 40               | 7,059,465    | Input | no                             |
| Fortschegger et al. 2010 | human   | Normal-IgG-293T                             | 0.94       | 1.21  | 0.22 | -2 | 50               | 50               | 50               | 7,860,447    | IgG   | no                             |
| Fortschegger et al. 2010 | human   | Normal-IgG-HeLa                             | 0.92       | 1.76  | 0.55 | 0  | 50               | 50               | 50               | 7,000,514    | IgG   | no                             |
| Fortschegger et al. 2010 | human   | PHF8-293T                                   | 0.96       | 1.71  | 0.71 | 0  | 50               | 50               | 50               | 7,015,757    | ChIP  | yes                            |
| Fortschegger et al. 2010 | human   | PHF8-HeLa                                   | 0.95       | 2.74  | 1.13 | 1  | 50               | 50               | 50               | 6,982,792    | ChIP  | yes                            |
| Fortschegger et al. 2010 | human   | PHF8-Hs68+FBS                               | 0.94       | 1.89  | 0.69 | 0  | 40               | 40               | 40               | 7,339,329    | ChIP  | yes                            |
| Fortschegger et al. 2010 | human   | PHF8-Hs68-FBS                               | 0.9        | 1.75  | 0.51 | 0  | 35               | 35               | 35               | 11,313,461   | ChIP  | yes                            |
| GSE15844                 | mouse   | MEF-NFIC-KO-NFI                             | 0.29       | 7.55  | 1.85 | 2  | 35               | 35               | 35               | 10,794,407   | ChIP  | no                             |
| GSE15844                 | mouse   | MEF-WT-Input                                | 0.74       | 1.42  | 0.28 | -1 | 36               | 36               | 36               | 5,483,670    | Input | no                             |
| GSE15844                 | mouse   | MEF-WT-NFI                                  | 0.34       | 5.81  | 1.72 | 2  | 35               | 35               | 35               | 9,746,594    | ChIP  | yes                            |
| Kim et al. 2010          | mouse   | ChIP-CBP-ab2832-KCl-b1                      | 0.88       | 2.46  | 0.88 | 0  | 33               | 33               | 33               | 1,742,367    | ChIP  | yes                            |
| Kim et al. 2010          | mouse   | ChIP-CBP-ab2832-KCl-b2                      | 0.9        | 1.9   | 0.31 | -1 | 33               | 33               | 33               | 1,350,494    | ChIP  | yes                            |
| Kim et al. 2010          | mouse   | ChIP-CBP-ab2832-un-b1                       | 0.11       | 2.19  | 0.23 | -2 | 33               | 33               | 33               | 13,062,901   | ChIP  | yes                            |
| Kim et al. 2010          | mouse   | ChIP-CBP-Millipore-KCl-b1                   | 0.14       | 2.55  | 0.19 | -2 | 33               | 33               | 33               | 21,475,816   | ChIP  | yes                            |
| Kim et al. 2010          | mouse   | ChIP-CBP-Millipore-un-b1                    | 0.14       | 3.57  | 0.22 | -2 | 33               | 33               | 33               | 12,767,854   | ChIP  | yes                            |
| Kim et al. 2010          | mouse   | ChIP-CREB-SC-KCl-b1                         | 0.25       | 1.6   | 0.2  | -2 | 33               | 33               | 33               | 12,606,497   | ChIP  | yes                            |
| Kim et al. 2010          | mouse   | ChIP-CREB-SC-KCl-b2                         | 0.11       | 2.71  | 0.25 | -1 | 33               | 33               | 33               | 14,186,880   | ChIP  | yes                            |
| Kim et al. 2010          | mouse   | ChIP-CREB-SC-un-b1                          | 0.47       | 1.39  | 0.25 | -2 | 33               | 33               | 33               | 11,723,416   | ChIP  | yes                            |
| Kim et al. 2010          | mouse   | ChIP-CREB-SC-un-b2                          | 0.11       | 3.54  | 0.43 | -1 | 33               | 33               | 33               | 11,668,187   | ChIP  | yes                            |
| Kim et al. 2010          | mouse   | ChIP-input-KCl-b1                           | 0.22       | 2.19  | 0.19 | -2 | 33               | 33               | 33               | 29,829,497   | Input | no                             |
| Kim et al. 2010          | mouse   | ChIP-input-KCl-b2                           | 0.55       | 1.29  | 0.3  | -1 | 33               | 33               | 33               | 11,407,302   | Input | no                             |
| Kim et al. 2010          | mouse   | ChIP-input-un-b1                            | 0.57       | 1.86  | 0.16 | -2 | 33               | 33               | 33               | 4,413,802    | Input | no                             |
| Kim et al. 2010          | mouse   | ChIP-input-un-b2                            | 0.59       | 1.28  | 0.39 | -1 | 33               | 33               | 33               | 2,034,854    | Input | no                             |
| Kim et al. 2010          | mouse   | ChIP-Npas4-KCl-b1                           | 0.3        | 3.33  | 1.38 | 1  | 33               | 33               | 33               | 6,262,184    | ChIP  | yes                            |
| Kim et al. 2010          | mouse   | ChIP-Npas4-KCl-b2                           | 0.7        | 2.39  | 0.92 | 0  | 33               | 33               | 33               | 3,474,756    | ChIP  | yes                            |
| Kim et al. 2010          | mouse   | ChIP-Npas4-un-b1                            | 0.39       | 1.84  | 0.21 | -2 | 33               | 33               | 33               | 12,918,805   | ChIP  | yes                            |
| Kim et al. 2010          | mouse   | ChIP-SRF-SC-KCl-b1                          | 0.88       | 3.77  | 0.28 | -1 | 33               | 33               | 33               | 1,953,844    | ChIP  | yes                            |
| Kim et al. 2010          | mouse   | ChIP-SRF-SC-KCl-b2                          | 0.86       | 2.72  | 0.46 | -1 | 33               | 33               | 33               | 7,001,063    | ChIP  | yes                            |
| Kim et al. 2010          | mouse   | ChIP-SRF-SC-un-b1                           | 0.89       | 2.58  | 0.47 | -1 | 33               | 33               | 33               | 2,076,216    | ChIP  | yes                            |
| Kim et al. 2010          | mouse   | ChIP-SRF-SC-un-b2                           | 0.87       | 2.2   | 0.98 | 0  | 33               | 33               | 33               | 8,797,223    | ChIP  | yes                            |
| Lefterova et al. 2010    | mouse   | Lefterova-ad-PPARg                          | 0.85       | 2.18  | 0.73 | 0  | 36               | 36               | 36               | 5,258,157    | ChIP  | yes                            |
| Lefterova et al. 2010    | mouse   | Lefterova-mac-CEBPb                         | 0.67       | 11.03 | 1.5  | 2  | 36               | 36               | 36               | 5,717,739    | ChIP  | yes                            |
| Lefterova et al. 2010    | mouse   | Lefterova-mac-PPARg-1                       | 0.87       | 1.59  | 0.69 | 0  | 36               | 36               | 36               | 10,646,239   | ChIP  | yes                            |
| Lefterova et al. 2010    | mouse   | Lefterova-mac-PU.1                          | 0.86       | 13.27 | 1.64 | 2  | 36               | 36               | 36               | 6,261,063    | ChIP  | yes                            |
| Tallack et al. 2010      | mouse   | KLF1-Input-2                                | 0.96       | 9.63  | 0.58 | 0  | 48               | 48               | 48               | 10,405,126   | Input | no                             |
| Tallack et al. 2010      | mouse   | KLF1-2                                      | 0.68       | 1.28  | 0.18 | -2 | 33               | 33               | 33               | 10,757,339   | ChIP  | yes                            |
| Tallack et al. 2010      | mouse   | KLF1-3                                      | 0.55       | 1.39  | 0.47 | -1 | 48               | 48               | 48               | 17,728,355   | ChIP  | yes                            |
| Tallack et al. 2010      | mouse   | KLF1-Input-3                                | 0.65       | 1.23  | 0.4  | -1 | 33               | 33               | 33               | 548,382      | Input | no                             |
| Rahl et al. 2010         | mouse   | mES-Ctr9                                    | 0.96       | 1.37  | 0.97 | 0  | 26               | 26               | 26               | 5,468,214    | ChIP  | yes                            |
| Rahl et al. 2010         | mouse   | mES-NelfA                                   | 0.7        | 2.42  | 1.42 | 1  | 36               | 36               | 36               | 3,643,555    | ChIP  | yes                            |
| Rahl et al. 2010         | mouse   | mES-Spt5                                    | 0.95       | 1.59  | 0.94 | 0  | 26               | 26               | 26               | 5,595,215    | ChIP  | yes                            |
| Ramos et al. 2010        | human   | T98G-CBP-T0                                 | 0.94       | 1.55  | 0.31 | -1 | 32               | 32               | 32               | 4,047,183    | ChIP  | yes                            |
| Ramos et al. 2010        | human   | T98G-CBP-T30-1                              | 0.94       | 1.63  | 0.4  | -1 | 32               | 32               | 32               | 4,885,700    | ChIP  | yes                            |
| Ramos et al. 2010        | human   | T98G-CBP-T30-2                              | 0.84       | 1.75  | 2.14 | 2  | 32               | 32               | 32               | 5,034,834    | ChIP  | yes                            |
| Ramos et al. 2010        | human   | T98G-p300-T0                                | 0.96       | 1.79  | 0.85 | 0  | 32               | 32               | 32               | 5,119,057    | ChIP  | yes                            |
| Ramos et al. 2010        | human   | T98G-p300-T30-1                             | 0.97       | 2.22  | 1.19 | 1  | 32               | 32               | 32               | 5,191,684    | ChIP  | yes                            |
| Ramos et al. 2010        | human   | T98G-p300-T30-2                             | 0.87       | 1.95  | 3.44 | 2  | 32               | 32               | 32               | 5,159,200    | ChIP  | yes                            |
| Kunarse et al. 2010      | human   | hESC-CTCF                                   | 0.92       | 15.2  | 1.62 | 2  | 37               | 37               | 37               | 10,828,759   | ChIP  | yes                            |
| Kunarse et al. 2010      | human   | hESC-NANOG                                  | 0.94       | 3.91  | 1.42 | 1  | 36.18            | 37               | 36               | 10,240,400   | ChIP  | yes                            |
| Kunarse et al. 2010      | human   | hESC-Nanog-and-CTCF-control                 | 0.96       | 1.25  | 0.19 | -2 | 37               | 37               | 37               | 8,641,430    | Input | no                             |
| Kunarse et al. 2010      | human   | hESC-OCT4                                   | 0.98       | 1.94  | 0.42 | -1 | 30.07            | 36               | 26               | 11,288,800   | ChIP  | yes                            |
| Kunarse et al. 2010      | human   | hESC-Oct4-control                           | 0.95       | 1.26  | 0.4  | -1 | 36               | 36               | 36               | 8,560,581    | Input | no                             |
| Johannes et al. 2010     | human   | HeLa-BTAF                                   | 0.79       | 13.25 | 2.7  | 2  | 33               | 33               | 33               | 2,654,681    | ChIP  | yes                            |
| Johannes et al. 2010     | human   | HeLa-GAPDH                                  | 0.84       | 2.51  | 0.02 | -2 | 33               | 33               | 33               | 953,719      | IgG   | no                             |
| Hu et al. 2010           | human   | MCF7-E2-ER                                  | 0.8        | 10.66 | 1.28 | 1  | 36               | 36               | 36               | 1,656,740    | ChIP  | yes                            |
| Hu et al. 2010           | human   | MCF7-ethl-ER                                | 0.81       | 3.76  | 0.87 | 0  | 36               | 36               | 36               | 2,857,720    | ChIP  | unknown                        |
| Heng et al. 2010         | mouse   | mESC-HA-1                                   | 0.97       | 1.25  | 0.83 | 0  | 35               | 35               | 35               | 14,266,600   | IgG   | no                             |
| Heng et al. 2010         | mouse   | mESC-HA-Nr5a2-1                             | 0.85       | 1.54  | 0.36 | -1 | 35               | 35               | 35               | 9,395,231    | ChIP  | yes                            |
| Chicas et al. 2010       | human   | IMR90-Growing-cells-pRb-experiment-1-1      | 0.78       | 2.94  | 0.41 | -1 | 36               | 36               | 36               | 6,181,869    | ChIP  | yes                            |

Continued on next page

Table S1 – Continued from previous page

| Source                  | Species | Library                                  | Complexity | NSC   | RSC  | QC | Ave. Read Length | Max. Read Length | Min. Read Length | Mapped reads | Type  | Should exhibit read clustering |
|-------------------------|---------|------------------------------------------|------------|-------|------|----|------------------|------------------|------------------|--------------|-------|--------------------------------|
| Chicas et al. 2010      | human   | IMR90-Mock-1                             | 0.85       | 2.18  | 0.13 | -2 | 36               | 36               | 36               | 3,317,485    | IgG   | no                             |
| Chicas et al. 2010      | human   | IMR90-Quiescent-cells-p130               | 0.92       | 4.12  | 0.95 | 0  | 36               | 36               | 36               | 3,753,591    | ChIP  | yes                            |
| Chicas et al. 2010      | human   | IMR90-Quiescent-cells-pRb-experiment-1-1 | 0.92       | 3.3   | 0.38 | -1 | 36               | 36               | 36               | 1,441,212    | ChIP  | yes                            |
| Chicas et al. 2010      | human   | IMR90-Quiescent-cells-pRb-experiment-2   | 0.93       | 2.43  | 0.05 | -2 | 36               | 36               | 36               | 4,608,677    | ChIP  | yes                            |
| Chicas et al. 2010      | human   | IMR90-Quiescent-cells-Rb-shRNA-p130      | 0.78       | 2.2   | 0.24 | -2 | 36               | 36               | 36               | 5,348,557    | ChIP  | yes                            |
| Chicas et al. 2010      | human   | IMR90-Quiescent-cells-Rb-shRNA-Rb        | 0.85       | 2.42  | 0.38 | -1 | 36               | 36               | 36               | 1,114,921    | ChIP  | no                             |
| Chicas et al. 2010      | human   | IMR90-Senescent-cells-p130               | 0.94       | 4.21  | 1.21 | 1  | 36               | 36               | 36               | 4,388,261    | ChIP  | yes                            |
| Chicas et al. 2010      | human   | IMR90-Senescent-cells-pRb-experiment-1-1 | 0.93       | 3.63  | 0.39 | -1 | 36               | 36               | 36               | 3,867,162    | ChIP  | yes                            |
| Chicas et al. 2010      | human   | IMR90-Senescent-cells-pRb-experiment-2   | 0.91       | 2.29  | 0.22 | -2 | 36               | 36               | 36               | 4,109,281    | ChIP  | yes                            |
| Chicas et al. 2010      | human   | IMR90-Senescent-cells-Rb-shRNA-p130      | 0.78       | 3.98  | 1.26 | 1  | 36               | 36               | 36               | 4,232,255    | ChIP  | yes                            |
| Chicas et al. 2010      | human   | IMR90-Senescent-cells-Rb-shRNA-pRb       | 0.89       | 2.02  | 0.23 | -2 | 36               | 36               | 36               | 2,813,407    | ChIP  | no                             |
| Martinez et al. 2010    | mouse   | Input                                    | 0.51       | 2.26  | 2.59 | 2  | 36               | 36               | 36               | 14,617,059   | Input | no                             |
| Martinez et al. 2010    | mouse   | RAP1-ko1-RAP1                            | 0.09       | 20.55 | 2.72 | 2  | 36               | 36               | 36               | 11,542,127   | ChIP  | no                             |
| Martinez et al. 2010    | mouse   | RAP1-ko2-RAP1                            | 0.18       | 21.54 | 3.88 | 2  | 36               | 36               | 36               | 7,585,528    | ChIP  | no                             |
| Martinez et al. 2010    | mouse   | WT-1-RAP1                                | 0.26       | 11.02 | 2.45 | 2  | 36               | 36               | 36               | 11,249,746   | ChIP  | yes                            |
| Martinez et al. 2010    | mouse   | WT-2-RAP1                                | 0.19       | 11.05 | 2.88 | 2  | 36               | 36               | 36               | 11,856,303   | ChIP  | yes                            |
| Qi et al. 2010          | human   | HeLa-PHF8                                | 0.9        | 1.66  | 0.78 | 0  | 25               | 25               | 25               | 9,252,893    | ChIP  | yes                            |
| Woodfield et al. 2010   | human   | MCF7-IgG-control                         | 0.97       | 1.38  | 0.63 | 0  | 40               | 40               | 40               | 8,158,903    | IgG   | no                             |
| Woodfield et al. 2010   | human   | MCF7-TFAP2C                              | 0.93       | 7.1   | 1.74 | 2  | 40               | 40               | 40               | 8,188,674    | ChIP  | yes                            |
| Kagey et al. 2010       | mouse   | MEF-Med12-Rep1                           | 0.85       | 1.58  | 0.46 | -1 | 36               | 36               | 36               | 8,167,440    | ChIP  | yes                            |
| Kagey et al. 2010       | mouse   | MEF-Med1-Rep1                            | 0.94       | 2.03  | 0.82 | 0  | 36               | 36               | 36               | 7,326,311    | ChIP  | yes                            |
| Kagey et al. 2010       | mouse   | MEF-Smc1-Rep1                            | 0.62       | 6.04  | 2.96 | 2  | 36               | 36               | 36               | 9,601,525    | ChIP  | yes                            |
| Kagey et al. 2010       | mouse   | MEF-Smc1-Rep2                            | 0.94       | 1.34  | 0.9  | 0  | 36               | 36               | 36               | 22,977,719   | ChIP  | yes                            |
| Kagey et al. 2010       | mouse   | mESC-CTCF-Rep1                           | 0.94       | 7.28  | 1.29 | 1  | 36               | 36               | 36               | 3,966,359    | ChIP  | yes                            |
| Kagey et al. 2010       | mouse   | mESC-CTCF-Rep2                           | 0.85       | 1.73  | 1.4  | 1  | 36               | 36               | 36               | 4,953,685    | ChIP  | yes                            |
| Kagey et al. 2010       | mouse   | mESC-Med12-051809-ChipSeq                | 0.84       | 7.16  | 1.9  | 2  | 36               | 36               | 36               | 22,763,608   | ChIP  | yes                            |
| Kagey et al. 2010       | mouse   | mESC-Med12-Rep2                          | 0.63       | 1.8   | 1.12 | 1  | 36               | 36               | 36               | 12,861,074   | ChIP  | yes                            |
| Kagey et al. 2010       | mouse   | mESC-Med1-Rep1                           | 0.92       | 2.27  | 1.68 | 2  | 36               | 36               | 36               | 18,346,720   | ChIP  | yes                            |
| Kagey et al. 2010       | mouse   | mESC-Med1-Rep2                           | 0.94       | 1.73  | 1.04 | 1  | 36               | 36               | 36               | 18,725,724   | ChIP  | yes                            |
| Kagey et al. 2010       | mouse   | mESC-Nipbl-Rep1                          | 0.26       | 1.33  | 0.54 | 0  | 36               | 36               | 36               | 6,241,538    | ChIP  | yes                            |
| Kagey et al. 2010       | mouse   | mESC-Nipbl-Rep2                          | 0.96       | 1.54  | 0.99 | 0  | 36               | 36               | 36               | 12,668,428   | ChIP  | yes                            |
| Kagey et al. 2010       | mouse   | mESC-Smc1-Rep1                           | 0.96       | 3.27  | 1.88 | 2  | 36               | 36               | 36               | 21,733,223   | ChIP  | yes                            |
| Kagey et al. 2010       | mouse   | mESC-Smc1-Rep2                           | 0.95       | 3.29  | 1.57 | 2  | 36               | 36               | 36               | 4,936,893    | ChIP  | yes                            |
| Kagey et al. 2010       | mouse   | mESC-Smc3-Rep3                           | 0.89       | 3.86  | 1.81 | 2  | 36               | 36               | 36               | 21,491,459   | ChIP  | yes                            |
| Kagey et al. 2010       | mouse   | mESC-Smc3-Rep4                           | 0.89       | 4.34  | 2.26 | 2  | 36               | 36               | 36               | 21,522,393   | ChIP  | yes                            |
| Kagey et al. 2010       | mouse   | mES-WCE                                  | 0.93       | 1.38  | 0.31 | -1 | 36               | 36               | 36               | 3,669,758    | Input | no                             |
| Kouwenhoven et al. 2010 | human   | Keratinocytes-p63-1                      | 0.96       | 19.62 | 2.46 | 2  | 32               | 32               | 32               | 2,722,489    | ChIP  | yes                            |
| Kouwenhoven et al. 2010 | human   | Keratinocytes-p63-2                      | 0.96       | 4.51  | 2.51 | 2  | 32               | 32               | 32               | 5,588,217    | ChIP  | yes                            |
| Kouwenhoven et al. 2010 | human   | Keratinocytes-p63-3                      | 0.81       | 9.05  | 5.19 | 2  | 35               | 35               | 35               | 20,435,516   | ChIP  | yes                            |
| Cao et al. 2010         | human   | RD-Input                                 | 0.82       | 1.34  | 0.33 | -1 | 40               | 40               | 40               | 6,587,573    | Input | no                             |
| Cao et al. 2010         | human   | RD-pFM2-1                                | 0.76       | 1.9   | 0.63 | 0  | 40               | 40               | 40               | 8,593,218    | ChIP  | yes                            |
| Cao et al. 2010         | human   | Rh4-Input-1                              | 0.82       | 1.35  | 0.36 | -1 | 38.7             | 40               | 36               | 20,270,400   | Input | no                             |
| Cao et al. 2010         | human   | Rh4-pFM2-1                               | 0.74       | 2.33  | 0.9  | 0  | 38.83            | 40               | 36               | 20,920,563   | ChIP  | yes                            |
| Blow et al. 2010        | mouse   | Heart-p300                               | 0.85       | 1.77  | 0.16 | -2 | 36               | 36               | 36               | 1,531,274    | ChIP  | yes                            |
| Blow et al. 2010        | mouse   | Midbrain-p300                            | 0.87       | 1.34  | 0.21 | -2 | 36               | 36               | 36               | 6,406,542    | ChIP  | yes                            |
| Sehat et al. 2010       | human   | DFB-IGF1R                                | 0.9        | 1.56  | 0.13 | -2 | 36               | 36               | 36               | 3,664,071    | ChIP  | yes                            |
| Liu et al. 2010         | human   | E2F1-HeLa                                | 0.96       | 1.91  | 0.81 | 0  | 36               | 36               | 36               | 8,595,301    | ChIP  | yes                            |
| Liu et al. 2010         | human   | PHF8-HeLa-unsyn                          | 0.97       | 2.21  | 0.84 | 0  | 36               | 36               | 36               | 3,841,047    | ChIP  | yes                            |
| Liu et al. 2010         | human   | SMC4-HeLa-M                              | 0.62       | 2.43  | 0.65 | 0  | 36               | 36               | 36               | 9,809,944    | ChIP  | yes                            |
| Tang et al. 2010        | human   | K562-PMA-Egr1                            | 0.84       | 1.62  | 0.21 | -2 | 33               | 33               | 33               | 3,581,558    | ChIP  | yes                            |
| Jung et al. 2010        | mouse   | iHoxc9-Day5                              | 0.97       | 1.35  | 0.79 | 0  | 36               | 36               | 36               | 10,149,860   | ChIP  | yes                            |
| Jung et al. 2010        | mouse   | WCE-Day5                                 | 0.94       | 1.37  | 0.82 | 0  | 36               | 36               | 36               | 15,043,390   | Input | no                             |
| Vermeulen et al. 2010   | human   | BAP18-GFP-HeLa-rep1                      | 0.8        | 2.1   | 1.6  | 2  | 35               | 35               | 35               | 11,153,198   | ChIP  | yes                            |
| Vermeulen et al. 2010   | human   | BAP18-GFP-HeLa-rep2                      | 0.83       | 1.91  | 2.1  | 2  | 35               | 35               | 35               | 28,580,771   | ChIP  | yes                            |
| Vermeulen et al. 2010   | human   | GATAD1-GFP-HeLa-rep1                     | 0.9        | 1.71  | 2.69 | 2  | 35               | 35               | 35               | 5,413,596    | ChIP  | yes                            |
| Vermeulen et al. 2010   | human   | GATAD1-GFP-HeLa-rep2                     | 0.81       | 2.4   | 1.83 | 2  | 35               | 35               | 35               | 12,596,319   | ChIP  | yes                            |
| Vermeulen et al. 2010   | human   | LRWD1-GFP-HeLa                           | 0.88       | 2.29  | 0.98 | 0  | 35               | 35               | 35               | 11,634,470   | ChIP  | yes                            |
| Vermeulen et al. 2010   | human   | N-PAC-GFP-HeLa-rep1                      | 0.85       | 2.01  | 2.46 | 2  | 35               | 35               | 35               | 5,436,726    | ChIP  | yes                            |
| Vermeulen et al. 2010   | human   | N-PAC-GFP-HeLa-rep2                      | 0.77       | 2.78  | 2.81 | 2  | 35               | 35               | 35               | 12,669,139   | ChIP  | yes                            |
| Vermeulen et al. 2010   | human   | PHF8-GFP-HeLa-rep1                       | 0.88       | 1.7   | 2.13 | 2  | 35               | 35               | 35               | 4,896,779    | ChIP  | yes                            |
| Vermeulen et al. 2010   | human   | PHF8-GFP-HeLa-rep2                       | 0.83       | 1.79  | 2.2  | 2  | 35               | 35               | 35               | 29,180,126   | ChIP  | yes                            |
| Vermeulen et al. 2010   | human   | Sgf29-GFP-HeLa-rep1                      | 0.87       | 2.36  | 1.45 | 1  | 35               | 35               | 35               | 12,636,931   | ChIP  | yes                            |
| Vermeulen et al. 2010   | human   | Sgf29-GFP-HeLa-rep2                      | 0.87       | 1.84  | 1.98 | 2  | 35               | 35               | 35               | 29,275,648   | ChIP  | yes                            |

Continued on next page

Table S1 – Continued from previous page

| Source                    | Species | Library                    | Complexity |       |      | Ave. Read Length | Max. Read Length | Min. Read Length | Mapped reads | Type       | Should exhibit read clustering |         |
|---------------------------|---------|----------------------------|------------|-------|------|------------------|------------------|------------------|--------------|------------|--------------------------------|---------|
|                           |         |                            | NSC        | RSC   | QC   |                  |                  |                  |              |            |                                |         |
| Vermeulen et al. 2010     | human   | TRRAP-GFP-HeLa-rep1        | 0.74       | 3.43  | 3.94 | 2                | 35               | 35               | 35           | 7,851,229  | ChIP                           | yes     |
| Vermeulen et al. 2010     | human   | TRRAP-GFP-HeLa-rep2        | 0.87       | 1.71  | 1.76 | 2                | 35               | 35               | 35           | 29,410,330 | ChIP                           | yes     |
| Vermeulen et al. 2010     | human   | wt-negative-control-HeLa   | 0.87       | 1.88  | 1.09 | 1                | 35               | 35               | 35           | 10,851,096 | Input                          | no      |
| Chi et al. 2010           | human   | GIST48-ETV1                | 0.95       | 2.79  | 0.97 | 0                | 36               | 36               | 36           | 10,740,357 | ChIP                           | yes     |
| Chi et al. 2010           | human   | GIST48-Input               | 0.98       | 1.12  | 0.27 | -1               | 36               | 36               | 36           | 15,177,140 | Input                          | no      |
| Chia et al. 2010          | human   | hESC-Input                 | 0.98       | 1.48  | 0.82 | 0                | 35               | 35               | 35           | 17,097,337 | Input                          | no      |
| Chia et al. 2010          | human   | hESC-PRDM14                | 0.95       | 1.87  | 0.67 | 0                | 35               | 35               | 35           | 14,268,098 | ChIP                           | no      |
| Palii et al. 2010         | human   | Erythroid-TAL1             | 0.94       | 6.12  | 0.9  | 0                | 37               | 37               | 37           | 6,882,358  | ChIP                           | yes     |
| Palii et al. 2010         | human   | Jurkat-IgG                 | 0.97       | 1.48  | 0.16 | -2               | 37               | 37               | 37           | 4,760,148  | IgG                            | no      |
| Palii et al. 2010         | human   | Jurkat-TAL1                | 0.94       | 2.58  | 0.45 | -1               | 37               | 37               | 37           | 6,151,678  | ChIP                           | yes     |
| Lee et al. 2010           | human   | GM06990-E2F4               | 0.95       | 1.99  | 0.5  | 0                | 36               | 36               | 36           | 2,845,819  | ChIP                           | yes     |
| Lee et al. 2010           | human   | GM06990-Input              | 0.98       | 1.09  | 0.1  | -2               | 36               | 36               | 36           | 7,164,483  | Input                          | no      |
| Law et al. 2010           | human   | ATRX-Human-Erythroid       | 0.98       | 1.83  | 0.31 | -1               | 36               | 36               | 36           | 1,481,778  | ChIP                           | yes     |
| Law et al. 2010           | human   | ATRX-Human-Erythroid-Input | 0.86       | 1.69  | 0.44 | -1               | 36               | 36               | 36           | 2,815,016  | Input                          | no      |
| Law et al. 2010           | mouse   | ATRX-Mouse-ES              | 0.86       | 1.52  | 0.39 | -1               | 51               | 51               | 51           | 47,903,467 | ChIP                           | yes     |
| Law et al. 2010           | mouse   | ATRX-Mouse-ES-Input        | 0.46       | 1.61  | 2.14 | 2                | 51               | 51               | 51           | 24,366,842 | Input                          | no      |
| Yao et al. 2010           | human   | HeLa-Input                 | 0.97       | 1.17  | 0.51 | 0                | 36               | 36               | 36           | 44,239,692 | Input                          | no      |
| Yao et al. 2010           | human   | HeLa-p68                   | 0.88       | 1.39  | 0.53 | 0                | 36               | 36               | 36           | 29,417,892 | ChIP                           | yes     |
| Verzi et al. 2010         | human   | Caco2-differentiated-CDX2  | 0.86       | 3.41  | 1.53 | 2                | 40               | 40               | 40           | 12,916,083 | ChIP                           | yes     |
| Verzi et al. 2010         | human   | Caco2-differentiated-GATA6 | 0.86       | 2.75  | 0.73 | 0                | 40               | 40               | 40           | 14,079,635 | ChIP                           | unknown |
| Verzi et al. 2010         | human   | Caco2-differentiated-HNF4A | 0.9        | 6.15  | 1.42 | 1                | 40               | 40               | 40           | 5,599,576  | ChIP                           | yes     |
| Verzi et al. 2010         | human   | Caco2-Input                | 0.79       | 2.68  | 1.27 | 1                | 40               | 40               | 40           | 10,777,726 | Input                          | no      |
| Verzi et al. 2010         | human   | Caco2-proliferating-CDX2   | 0.87       | 3.04  | 1.24 | 1                | 40               | 40               | 40           | 11,527,010 | ChIP                           | unknown |
| Verzi et al. 2010         | human   | Caco2-proliferating-GATA6  | 0.77       | 12.01 | 1.6  | 2                | 40               | 40               | 40           | 7,337,182  | ChIP                           | yes     |
| Verzi et al. 2010         | human   | Caco2-proliferating-HNF4A  | 0.76       | 6.64  | 1.55 | 2                | 40               | 40               | 40           | 9,186,141  | ChIP                           | yes     |
| Barish et al. 2010        | mouse   | macrophage-BCL6            | 0.73       | 3.1   | 1.36 | 1                | 42               | 42               | 42           | 14,741,775 | ChIP                           | yes     |
| Barish et al. 2010        | mouse   | macrophage-BCL6-LPS-1      | 0.59       | 2.47  | 1.38 | 1                | 36               | 36               | 36           | 12,161,935 | ChIP                           | unknown |
| Barish et al. 2010        | mouse   | macrophage-BCL6-LPS-2      | 0.52       | 1.99  | 1.02 | 1                | 42               | 42               | 42           | 19,613,630 | ChIP                           | unknown |
| Barish et al. 2010        | mouse   | macrophage-Bcl6-REP2       | 0.43       | 8.05  | 3.11 | 2                | 36               | 36               | 36           | 10,772,781 | ChIP                           | yes     |
| Barish et al. 2010        | mouse   | macrophage-IgG             | 0.59       | 3.32  | 1.14 | 1                | 36               | 36               | 36           | 11,046,455 | IgG                            | no      |
| Barish et al. 2010        | mouse   | macrophage-Input           | 0.96       | 1.33  | 0.5  | -1               | 36               | 36               | 36           | 14,265,664 | Input                          | no      |
| Barish et al. 2010        | mouse   | macrophage-p65             | 0.85       | 3.3   | 2.23 | 2                | 42               | 42               | 42           | 13,878,454 | ChIP                           | no      |
| Barish et al. 2010        | mouse   | macrophage-p65-LPS-1       | 0.71       | 2.6   | 1.23 | 1                | 43               | 43               | 43           | 12,731,143 | ChIP                           | yes     |
| Barish et al. 2010        | mouse   | macrophage-p65-LPS-2       | 0.75       | 1.95  | 1.2  | 1                | 42               | 42               | 42           | 10,819,755 | ChIP                           | yes     |
| Mahony et al. 2010        | mouse   | HBG3-RAR-Day2+8hrsRA-1     | 0.67       | 1.6   | 0.6  | 0                | 26               | 26               | 26           | 16,947,890 | ChIP                           | yes     |
| Mahony et al. 2010        | mouse   | HBG3-RAR-Day2-1            | 0.7        | 1.87  | 0.76 | 0                | 26               | 26               | 26           | 19,693,750 | ChIP                           | yes     |
| Mahony et al. 2010        | mouse   | HBG3-WCE-Day2              | 0.92       | 1.52  | 0.15 | -2               | 26               | 26               | 26           | 2,570,671  | Input                          | no      |
| Mahony et al. 2010        | mouse   | HBG3-WCE-Day3              | 0.94       | 1.44  | 0.2  | -2               | 26               | 26               | 26           | 3,038,741  | Input                          | no      |
| Yu et al. 2010            | human   | HPC-GABPa                  | 0.73       | 7     | 1.7  | 2                | 24               | 24               | 24           | 3,036,253  | ChIP                           | yes     |
| Yu et al. 2010            | human   | HPC-IgG                    | 0.45       | 15.8  | 2.15 | 2                | 25               | 25               | 25           | 2,762,252  | IgG                            | no      |
| Rada-Iglesias et al. 2010 | human   | ESC-BRG1                   | 0.95       | 1.66  | 1.37 | 1                | 36               | 36               | 36           | 16,085,353 | ChIP                           | yes     |
| Rada-Iglesias et al. 2010 | human   | ESC-input                  | 0.95       | 1.33  | 0.98 | 0                | 36               | 36               | 36           | 14,508,164 | Input                          | no      |
| Rada-Iglesias et al. 2010 | human   | ESC-p300                   | 0.92       | 2.01  | 2.76 | 2                | 36               | 36               | 36           | 12,822,655 | ChIP                           | yes     |
| Rada-Iglesias et al. 2010 | human   | NEC-input                  | 0.97       | 1.34  | 0.65 | 0                | 36               | 36               | 36           | 21,774,646 | Input                          | no      |
| Rada-Iglesias et al. 2010 | human   | NEC-p300                   | 0.94       | 1.71  | 0.58 | 0                | 36               | 36               | 36           | 13,264,013 | ChIP                           | yes     |
| Gu et al. 2010            | human   | MCF7-control-ERa           | 0.79       | 1.57  | 0.24 | -2               | 36               | 36               | 36           | 4,385,795  | ChIP                           | no      |
| Gu et al. 2010            | human   | MCF7-E2-ERa                | 0.8        | 1.81  | 0.28 | -1               | 36               | 36               | 36           | 5,785,635  | ChIP                           | yes     |
| Ma et al. 2010            | mouse   | mESC-FLAG-HA               | 0.93       | 1.59  | 0.59 | 0                | 36               | 36               | 36           | 6,257,485  | IgG                            | no      |
| Ma et al. 2010            | mouse   | mESC-Input                 | 0.9        | 1.36  | 1.23 | 1                | 36               | 36               | 36           | 8,480,128  | Input                          | no      |
| Ma et al. 2010            | mouse   | mESC-Prdm14                | 0.84       | 5.1   | 2.59 | 2                | 36               | 36               | 36           | 10,899,040 | ChIP                           | yes     |
| Schlesinger et al. 2010   | mouse   | HL1-SRF                    | 0.93       | 1.53  | 1.12 | 1                | 36               | 36               | 36           | 5,086,170  | ChIP                           | yes     |
| Li et al. 2010            | mouse   | Lin-Gata2                  | 0.85       | 1.89  | 0.88 | 0                | 25               | 25               | 25           | 7,512,398  | ChIP                           | yes     |
| Li et al. 2010            | mouse   | Lin-IgG                    | 0.75       | 1.87  | 0.2  | -2               | 25               | 25               | 25           | 3,211,969  | IgG                            | no      |
| Li et al. 2010            | mouse   | Lin-Ldb1                   | 0.71       | 5.7   | 1.95 | 2                | 25               | 25               | 25           | 4,251,705  | ChIP                           | yes     |
| Li et al. 2010            | mouse   | Lin-Tal1                   | 0.81       | 4.15  | 1.77 | 2                | 36               | 36               | 36           | 11,482,776 | ChIP                           | yes     |
| Kong et al. 2010          | human   | ECC1-E2-ERa                | 0.95       | 1.65  | 0.37 | -1               | 31.26            | 36               | 26           | 7,178,094  | ChIP                           | yes     |
| Kong et al. 2010          | human   | ECC1-EtOH-ERa              | 0.94       | 1.35  | 0.21 | -2               | 26               | 26               | 26           | 11,049,926 | ChIP                           | no      |
| Kong et al. 2010          | human   | ECC1-Input                 | 0.98       | 1.19  | 0.19 | -2               | 30.16            | 36               | 26           | 7,631,501  | Input                          | no      |
| Kong et al. 2010          | human   | Ishikawa-E2-ERa            | 0.97       | 1.42  | 0.41 | -1               | 30.73            | 36               | 26           | 10,438,320 | ChIP                           | yes     |
| Kong et al. 2010          | human   | Ishikawa-EtOH-ERa          | 0.97       | 1.38  | 0.36 | -1               | 30.55            | 36               | 26           | 10,175,702 | ChIP                           | no      |
| Kong et al. 2010          | human   | Ishikawa-Input             | 0.98       | 1.19  | 0.37 | -1               | 26               | 26               | 26           | 21,437,974 | Input                          | no      |
| Kong et al. 2010          | human   | MCF7-E2-ERa                | 0.95       | 5.96  | 1.63 | 2                | 26               | 26               | 26           | 9,652,711  | ChIP                           | yes     |
| Kong et al. 2010          | human   | MCF7-EtOH-ERa              | 0.97       | 1.23  | 0.4  | -1               | 33.21            | 36               | 26           | 14,488,769 | ChIP                           | no      |
| Kong et al. 2010          | human   | MCF7-Input                 | 0.97       | 1.17  | 0.18 | -2               | 26               | 26               | 26           | 8,379,328  | Input                          | no      |
| Kong et al. 2010          | human   | T47D-E2-ERa                | 0.97       | 2.84  | 1.13 | 1                | 26               | 26               | 26           | 10,608,916 | ChIP                           | yes     |
| Kong et al. 2010          | human   | T47D-EtOH-ERa              | 0.97       | 1.21  | 0.29 | -1               | 33.66            | 36               | 26           | 13,430,557 | ChIP                           | no      |
| Kong et al. 2010          | human   | T47D-Input                 | 0.96       | 1.18  | 0.19 | -2               | 26               | 26               | 26           | 12,933,672 | Input                          | no      |
| Yang et al. 2010          | human   | MCF7-IgG                   | 0.1        | 14.93 | 1.71 | 2                | 36               | 36               | 36           | 5,500,498  | IgG                            | no      |
| Yang et al. 2010          | human   | MCF7-TDRD3                 | 0.34       | 3.12  | 1.25 | 1                | 36               | 36               | 36           | 27,147,620 | ChIP                           | yes     |
| Fang et al. 2011          | human   | LN229-IgG                  | 0.6        | 2.01  | 1.53 | 2                | 40               | 40               | 40           | 455,630    | IgG                            | no      |
| Fang et al. 2011          | human   | LN229-Sox2                 | 0.65       | 1.8   | 1.04 | 1                | 40               | 40               | 40           | 932,166    | ChIP                           | yes     |

Continued on next page

Table S1 – Continued from previous page

| Source                                 | Species  | Library                             | Complexity | NSC  | RSC  | QC  | Ave. Read Length | Max. Read Length | Min. Read Length | Mapped reads | Type  | Should exhibit read clustering |
|----------------------------------------|----------|-------------------------------------|------------|------|------|-----|------------------|------------------|------------------|--------------|-------|--------------------------------|
| van Heeringen et al. 2011              | xaenopus | TBP-ChIPSeq                         | 0.83       | N/A  | N/A  | N/A | 32               | 32               | 32               | 6,569,902    | ChIP  | yes                            |
| GSE26680                               | mouse    | mES-MCAF1                           | 0.86       | 1.63 | 1.04 | 1   | 36               | 36               | 36               | 13,907,040   | ChIP  | yes                            |
| GSE26680                               | mouse    | mES-REST                            | 0.86       | 2.61 | 1.01 | 1   | 26               | 26               | 26               | 4,159,486    | ChIP  | yes                            |
| GSE26680                               | mouse    | mES-Ring1b                          | 0.92       | 1.23 | 0.43 | -1  | 26               | 26               | 26               | 3,785,138    | ChIP  | yes                            |
| Teo et al. 2011                        | human    | hESC-48h-endodiff-EOMES-XL-eps1and2 | 0.74       | 4.08 | 1.67 | 2   | 36               | 36               | 36               | 33,687,700   | ChIP  | yes                            |
| Teo et al. 2011                        | human    | hESC-Input-XL                       | 0.98       | 1.37 | 0.44 | -1  | 36               | 36               | 36               | 7,422,963    | Input | no                             |
| Joseph et al. 2011; Kong et al. 2010   | human    | MCF7-DMSO-cFos-1                    | 0.93       | 1.31 | 0.43 | -1  | 36               | 36               | 36               | 18,781,755   | ChIP  | yes                            |
| Joseph et al. 2011; Kong et al. 2010   | human    | MCF7-DMSO-cJun-1                    | 0.96       | 1.31 | 0.37 | -1  | 36               | 36               | 36               | 14,827,454   | ChIP  | yes                            |
| Joseph et al. 2011; Kong et al. 2010   | human    | MCF7-DMSO-FOXA1-1                   | 0.95       | 1.51 | 0.63 | 0   | 36               | 36               | 36               | 14,414,733   | ChIP  | yes                            |
| Joseph et al. 2011; Kong et al. 2010   | human    | MCF7-E2-cFos-1                      | 0.95       | 1.48 | 0.68 | 0   | 31               | 31               | 31               | 12,684,762   | ChIP  | yes                            |
| Joseph et al. 2011; Kong et al. 2010   | human    | MCF7-E2-cJun-1                      | 0.95       | 1.31 | 0.4  | -1  | 36               | 36               | 36               | 18,012,142   | ChIP  | yes                            |
| Joseph et al. 2011; Kong et al. 2010   | human    | MCF7-E2-FOXA1-1                     | 0.93       | 2.52 | 1.07 | 1   | 36               | 36               | 36               | 15,884,461   | ChIP  | yes                            |
| Joseph et al. 2011; Kong et al. 2010   | human    | T47D-DMSO-FOXA1                     | 0.94       | 5.13 | 1.78 | 2   | 36               | 36               | 36               | 14,981,282   | ChIP  | yes                            |
| Joseph et al. 2011; Kong et al. 2010   | human    | T47D-E2-FOXA1-1                     | 0.94       | 2.27 | 0.92 | 0   | 36               | 36               | 36               | 11,819,434   | ChIP  | yes                            |
| Novershtern et al. 2011                | human    | HSPC-Ikaros-rep1                    | 0.74       | 2.04 | 0.36 | -1  | 36               | 36               | 36               | 3,228,102    | ChIP  | yes                            |
| Novershtern et al. 2011                | human    | HSPC-Ikaros-rep2                    | 0.78       | 1.98 | 0.31 | -1  | 36               | 36               | 36               | 2,635,528    | ChIP  | yes                            |
| Novershtern et al. 2011                | human    | HSPC-MEIS1-rep1                     | 0.46       | 1.85 | 0.34 | -1  | 36               | 36               | 36               | 9,565,937    | ChIP  | yes                            |
| Novershtern et al. 2011                | human    | HSPC-MEIS1-rep2                     | 0.29       | 1.84 | 0.36 | -1  | 36               | 36               | 36               | 12,342,658   | ChIP  | yes                            |
| Novershtern et al. 2011                | human    | HSPC-MEIS1-rep3                     | 0.46       | 1.78 | 0.34 | -1  | 36               | 36               | 36               | 10,465,042   | ChIP  | yes                            |
| Novershtern et al. 2011                | human    | HSPC-Pu.1-rep1                      | 0.6        | 3.44 | 1.05 | 1   | 36               | 36               | 36               | 4,940,474    | ChIP  | yes                            |
| Novershtern et al. 2011                | human    | HSPC-Pu.1-rep2                      | 0.61       | 3.19 | 1.03 | 1   | 36               | 36               | 36               | 4,617,421    | ChIP  | yes                            |
| Novershtern et al. 2011                | human    | HSPC-TAL1-rep1                      | 0.69       | 1.31 | 0.18 | -2  | 36               | 36               | 36               | 8,788,837    | ChIP  | yes                            |
| Novershtern et al. 2011                | human    | HSPC-TAL1-rep2                      | 0.72       | 1.36 | 0.19 | -2  | 36               | 36               | 36               | 7,439,145    | ChIP  | yes                            |
| Novershtern et al. 2011                | human    | HSPC-WCE                            | 0.95       | 1.23 | 0.24 | -2  | 36               | 36               | 36               | 6,321,189    | Input | no                             |
| GSE23581                               | mouse    | mES-Acivtin-Input                   | 0.93       | 1.44 | 0.56 | 0   | 35               | 35               | 35               | 9,674,331    | Input | no                             |
| GSE23581                               | mouse    | mES-Acivtin-pSmad2                  | 0.81       | 1.98 | 1.31 | 1   | 35               | 35               | 35               | 11,730,560   | ChIP  | yes                            |
| GSE23581                               | mouse    | mES-DMSO-Input                      | 0.93       | 1.51 | 0.69 | 0   | 35               | 35               | 35               | 10,750,428   | Input | no                             |
| GSE23581                               | mouse    | mES-DMSO-pSmad2                     | 0.77       | 2.26 | 1.47 | 1   | 35               | 35               | 35               | 11,288,314   | ChIP  | no                             |
| GSE23581                               | mouse    | mES-SP-Input                        | 0.92       | 1.65 | 0.73 | 0   | 35               | 35               | 35               | 9,325,370    | Input | no                             |
| GSE23581                               | mouse    | mES-SP-pSmad2                       | 0.8        | 2.16 | 1.08 | 1   | 35               | 35               | 35               | 9,079,108    | ChIP  | no                             |
| GSE26136                               | mouse    | mES-Dpy-30                          | 0.69       | 1.69 | 1.54 | 2   | 36               | 36               | 36               | 24,620,668   | ChIP  | yes                            |
| Klisch et al. 2011                     | mouse    | Cerebella-Atoh1.control             | 0.95       | 2.28 | 0.97 | 0   | 35               | 35               | 35               | 10,310,101   | Input | no                             |
| Klisch et al. 2011                     | mouse    | Cerebella-Atoh1.rep1                | 0.89       | 7.47 | 1.86 | 2   | 35               | 35               | 35               | 2,649,698    | ChIP  | yes                            |
| Klisch et al. 2011                     | mouse    | Cerebella-Atoh1.rep2                | 0.92       | 3.36 | 0.96 | 0   | 35               | 35               | 35               | 7,166,233    | ChIP  | yes                            |
| Klisch et al. 2011                     | mouse    | Cerebella-IgG.s-5                   | 0.69       | 2.33 | 1.44 | 1   | 36               | 36               | 36               | 8,514,915    | IgG   | no                             |
| Yang et al. 2011                       | mouse    | WTTh17STAT3                         | 0.73       | 4.58 | 1.63 | 2   | 25               | 25               | 25               | 28,501,100   | ChIP  | yes                            |
| Yang et al. 2011                       | mouse    | WTTh17STAT5                         | 0.58       | 6.08 | 1.65 | 2   | 25               | 25               | 25               | 30,799,471   | ChIP  | yes                            |
| Ebert et al. 2011; McManus et al. 2011 | mouse    | DP-Tcell-CTCF                       | 0.35       | 5.94 | 5.08 | 2   | 36               | 36               | 36               | 13,326,337   | ChIP  | yes                            |
| Ebert et al. 2011; McManus et al. 2011 | mouse    | Mature-Bcell-CTCF                   | 0.66       | 4.24 | 6.97 | 2   | 36               | 36               | 36               | 14,505,107   | ChIP  | yes                            |
| Ebert et al. 2011; McManus et al. 2011 | mouse    | Pro-Bcell-Rad21                     | 0.84       | 6.82 | 3.35 | 2   | 36               | 36               | 36               | 25,074,201   | ChIP  | yes                            |
| Ebert et al. 2011; McManus et al. 2011 | mouse    | Pro-Bcell-Rag2KO-CTCF               | 0.62       | 4.52 | 3.98 | 2   | 36               | 36               | 36               | 15,641,228   | ChIP  | yes                            |
| Zhao et al. 2011                       | mouse    | Myb-activated-B1T1                  | 0.81       | 3.23 | 0.98 | 0   | 36               | 36               | 36               | 7,467,313    | ChIP  | yes                            |
| Zhao et al. 2011                       | mouse    | Myb-activated-B1T2                  | 0.83       | 3.33 | 0.88 | 0   | 36               | 36               | 36               | 5,454,019    | ChIP  | yes                            |
| Zhao et al. 2011                       | mouse    | Myb-activated-B2                    | 0.86       | 3.03 | 1.07 | 1   | 36               | 36               | 36               | 7,331,382    | ChIP  | yes                            |
| Zhao et al. 2011                       | mouse    | Myb-activated-IgG                   | 0.73       | 1.98 | 0.58 | 0   | 36               | 36               | 36               | 6,724,529    | IgG   | no                             |
| Zhao et al. 2011                       | mouse    | Myb-inactivated-B1                  | 0.83       | 1.79 | 0.5  | -1  | 36               | 36               | 36               | 5,729,128    | ChIP  | no                             |
| Zhao et al. 2011                       | mouse    | Myb-inactivated-B2                  | 0.87       | 1.79 | 0.51 | 0   | 36               | 36               | 36               | 5,734,826    | ChIP  | no                             |
| Zhao et al. 2011                       | mouse    | Myb-inactivated-IgG                 | 0.94       | 4.16 | 0.34 | -1  | 36               | 36               | 36               | 766,809      | IgG   | no                             |
| Rey et al. 2011                        | mouse    | BMAL1-ZT02-rep1                     | 0.8        | 2.4  | 1.15 | 1   | 37               | 37               | 37               | 9,023,818    | ChIP  | unknown                        |
| Rey et al. 2011                        | mouse    | BMAL1-ZT02-rep2                     | 0.74       | 1.76 | 1.5  | 1   | 37               | 37               | 37               | 24,294,126   | ChIP  | unknown                        |
| Rey et al. 2011                        | mouse    | BMAL1-ZT06-rep1                     | 0.66       | 2.1  | 1.71 | 2   | 37               | 37               | 37               | 20,808,528   | ChIP  | unknown                        |
| Rey et al. 2011                        | mouse    | BMAL1-ZT06-rep2                     | 0.25       | 5.49 | 1.89 | 2   | 37               | 37               | 37               | 20,234,777   | ChIP  | unknown                        |
| Rey et al. 2011                        | mouse    | BMAL1-ZT10-rep1                     | 0.9        | 1.75 | 0.92 | 0   | 37               | 37               | 37               | 9,220,495    | ChIP  | unknown                        |
| Rey et al. 2011                        | mouse    | BMAL1-ZT10-rep2                     | 0.84       | 1.74 | 1.53 | 2   | 37               | 37               | 37               | 22,892,744   | ChIP  | unknown                        |
| Rey et al. 2011                        | mouse    | BMAL1-ZT14-rep1                     | 0.88       | 1.61 | 0.84 | 0   | 37               | 37               | 37               | 12,447,404   | ChIP  | unknown                        |
| Rey et al. 2011                        | mouse    | BMAL1-ZT14-rep2                     | 0.64       | 2.91 | 2.58 | 2   | 37               | 37               | 37               | 20,961,930   | ChIP  | unknown                        |
| Rey et al. 2011                        | mouse    | BMAL1-ZT18-rep1                     | 0.7        | 2.03 | 1.77 | 2   | 37               | 37               | 37               | 22,079,073   | ChIP  | unknown                        |
| Rey et al. 2011                        | mouse    | BMAL1-ZT18-rep2                     | 0.21       | 4.51 | 1.94 | 2   | 37               | 37               | 37               | 30,803,372   | ChIP  | unknown                        |
| Rey et al. 2011                        | mouse    | BMAL1-ZT22-rep1                     | 0.67       | 2.77 | 1.33 | 1   | 37               | 37               | 37               | 10,194,650   | ChIP  | unknown                        |

Continued on next page

Table S1 – Continued from previous page

| Source                           | Species | Library                         | Complexity | NSC  | RSC  | QC | Ave. Read Length | Max. Read Length | Min. Read Length | Mapped reads | Type  | Should exhibit read clustering |
|----------------------------------|---------|---------------------------------|------------|------|------|----|------------------|------------------|------------------|--------------|-------|--------------------------------|
|                                  |         |                                 |            |      |      |    |                  |                  |                  |              |       |                                |
| Rey et al. 2011                  | mouse   | BMAL1-ZT22-rep2                 | 0.88       | 1.4  | 0.85 | 0  | 37               | 37               | 37               | 21,473,568   | ChIP  | unknown                        |
| Rey et al. 2011                  | mouse   | Input-DNA                       | 0.84       | 1.76 | 1.44 | 1  | 37               | 37               | 37               | 21,940,254   | Input | no                             |
| Koeppel et al. 2011              | human   | Saos-2-ChIP-Input-control       | 0.96       | 1.2  | 0.44 | -1 | 35               | 35               | 35               | 15,967,510   | Input | no                             |
| Koeppel et al. 2011              | human   | Saos-2-p53-replicate1-1         | 0.86       | 2.41 | 1    | 1  | 35               | 35               | 35               | 14,932,313   | ChIP  | yes                            |
| Koeppel et al. 2011              | human   | Saos-2-p53-replicate2           | 0.95       | 2.26 | 1.68 | 2  | 35               | 35               | 35               | 14,969,104   | ChIP  | yes                            |
| Koeppel et al. 2011              | human   | Saos-2-TAp73alpha-replicate1    | 0.84       | 2.57 | 2.6  | 2  | 35               | 35               | 35               | 14,905,593   | ChIP  | yes                            |
| Koeppel et al. 2011              | human   | Saos-2-TAp73alpha-replicate2    | 0.93       | 2.05 | 1.34 | 1  | 35               | 35               | 35               | 14,626,232   | ChIP  | yes                            |
| Koeppel et al. 2011              | human   | Saos-2-TAp73beta-replicate1     | 0.96       | 5.1  | 4.12 | 2  | 32               | 32               | 32               | 4,927,558    | ChIP  | yes                            |
| Koeppel et al. 2011              | human   | Saos-2-TAp73beta-replicate2     | 0.94       | 6.37 | 2.61 | 2  | 35               | 35               | 35               | 16,272,496   | ChIP  | yes                            |
| He et al. 2011                   | mouse   | HL1-BirA-control-1              | 0.3        | 8.52 | 9.14 | 2  | 40               | 40               | 40               | 15,388,943   | IgG   | no                             |
| He et al. 2011                   | mouse   | HL1-Gata4-1                     | 0.57       | 2.11 | 2.92 | 2  | 37.77            | 40               | 35               | 21,352,298   | ChIP  | yes                            |
| He et al. 2011                   | mouse   | HL1-Input-control               | 0.92       | 1.94 | 1.84 | 2  | 36               | 36               | 36               | 13,770,246   | Input | no                             |
| He et al. 2011                   | mouse   | HL1-Mef2a-1                     | 0.92       | 1.34 | 1    | 1  | 38.18            | 40               | 35               | 20,160,274   | ChIP  | yes                            |
| He et al. 2011                   | mouse   | HL1-Nkx2-5-1                    | 0.91       | 1.69 | 3.09 | 2  | 38.59            | 40               | 36               | 24,181,076   | ChIP  | yes                            |
| He et al. 2011                   | mouse   | HL1-P300                        | 0.9        | 1.83 | 1.28 | 1  | 36               | 36               | 36               | 15,446,431   | ChIP  | yes                            |
| He et al. 2011                   | mouse   | HL1-Srf-1                       | 0.8        | 1.81 | 2.37 | 2  | 38.29            | 40               | 36               | 25,881,877   | ChIP  | yes                            |
| He et al. 2011                   | mouse   | HL1-Tbx5-1                      | 0.9        | 2.1  | 2.13 | 2  | 37.91            | 40               | 36               | 11,074,980   | ChIP  | yes                            |
| Bugge et al. 2011                | mouse   | Liver-HDAC3-ZT10                | 0.49       | 2.56 | 1.67 | 2  | 36.93            | 38               | 36               | 38,211,882   | ChIP  | unknown                        |
| Bugge et al. 2011                | mouse   | Liver-HDAC3-ZT22                | 0.76       | 1.34 | 1.09 | 1  | 39.03            | 40               | 38               | 38,822,996   | ChIP  | unknown                        |
| Bugge et al. 2011                | mouse   | Liver-input-Mnase-ZT10          | 0.81       | 4.86 | 1.96 | 2  | 38               | 38               | 38               | 20,627,184   | Input | no                             |
| Bugge et al. 2011                | mouse   | Liver-input-Mnase-ZT22          | 0.8        | 4.49 | 1.52 | 2  | 38               | 38               | 38               | 18,828,586   | Input | no                             |
| Bugge et al. 2011                | mouse   | Liver-input-ZT10                | 0.58       | 1.35 | 1.13 | 1  | 40               | 40               | 40               | 18,254,032   | Input | no                             |
| Bugge et al. 2011                | mouse   | Liver-input-ZT22                | 0.64       | 2.1  | 2.06 | 2  | 40               | 40               | 40               | 14,072,057   | Input | no                             |
| Bugge et al. 2011                | mouse   | Liver-NCoR-ZT10                 | 0.72       | 2.5  | 1.24 | 1  | 38               | 38               | 38               | 10,955,647   | ChIP  | unknown                        |
| Bugge et al. 2011                | mouse   | Liver-NCoR-ZT22                 | 0.8        | 1.4  | 0.86 | 0  | 38               | 38               | 38               | 18,218,400   | ChIP  | unknown                        |
| Bugge et al. 2011                | mouse   | Liver-Rev-erba-ZT10             | 0.54       | 3.5  | 1.52 | 2  | 36               | 36               | 36               | 23,266,910   | ChIP  | unknown                        |
| Bugge et al. 2011                | mouse   | Liver-Rev-erba-ZT22             | 0.38       | 1.8  | 0.87 | 0  | 36               | 36               | 36               | 26,701,376   | ChIP  | unknown                        |
| Siersbæk et al. 2011             | mouse   | CEBPbeta-2-hours                | 0.86       | 4.2  | 4.51 | 2  | 36               | 36               | 36               | 13,391,765   | ChIP  | yes                            |
| Siersbæk et al. 2011             | mouse   | CEBPbeta-4-hours                | 0.82       | 3.94 | 5.44 | 2  | 36               | 36               | 36               | 14,184,719   | ChIP  | yes                            |
| Siersbæk et al. 2011             | mouse   | CEBPbeta-day-0                  | 0.69       | 4.74 | 5.95 | 2  | 36               | 36               | 36               | 13,823,228   | ChIP  | yes                            |
| Siersbæk et al. 2011             | mouse   | CEBPbeta-day-2                  | 0.77       | 3.59 | 2.97 | 2  | 36               | 36               | 36               | 11,535,365   | ChIP  | yes                            |
| Siersbæk et al. 2011             | mouse   | CEBPdelta-4-hours               | 0.63       | 6.24 | 3.44 | 2  | 40               | 40               | 40               | 11,803,122   | ChIP  | yes                            |
| Siersbæk et al. 2011             | mouse   | CEBPdelta-day-0                 | 0.59       | 5.05 | 4.73 | 2  | 40               | 40               | 40               | 12,036,027   | ChIP  | yes                            |
| Siersbæk et al. 2011             | mouse   | GR-4-hours                      | 0.41       | 3.12 | 1.97 | 2  | 24               | 24               | 24               | 9,694,597    | ChIP  | yes                            |
| Siersbæk et al. 2011             | mouse   | Input                           | 0.92       | 1.27 | 0.71 | 0  | 36               | 36               | 36               | 12,904,842   | Input | no                             |
| Siersbæk et al. 2011             | mouse   | PPARGgamma-day-2                | 0.29       | 2.31 | 0.96 | 0  | 40               | 40               | 40               | 13,429,961   | ChIP  | yes                            |
| Siersbæk et al. 2011             | mouse   | PPARGgamma-day-6                | 0.3        | 2.28 | 1.64 | 2  | 40               | 40               | 40               | 14,620,856   | ChIP  | yes                            |
| Siersbæk et al. 2011             | mouse   | RXR-4-hours                     | 0.7        | 3.12 | 2.85 | 2  | 40               | 40               | 40               | 12,219,467   | ChIP  | yes                            |
| Siersbæk et al. 2011             | mouse   | Stat5a-4-hours                  | 0.62       | 4.33 | 5.62 | 2  | 36               | 36               | 36               | 13,644,364   | ChIP  | yes                            |
| Smeenk et al. 2011               | human   | U2OS-p53-ActD                   | 0.97       | 5.72 | 1.81 | 2  | 32               | 32               | 32               | 6,940,755    | ChIP  | yes                            |
| Smeenk et al. 2011               | human   | U2OS-p53-Eto                    | 0.97       | 4.28 | 1.27 | 1  | 32               | 32               | 32               | 7,272,634    | ChIP  | yes                            |
| Smeenk et al. 2011               | human   | U2OS-p53-pS15-ActD              | 0.96       | 1.74 | 0.54 | 0  | 32               | 32               | 32               | 4,742,221    | ChIP  | yes                            |
| Smeenk et al. 2011               | human   | U2OS-p53-pS15-Eto               | 0.94       | 1.8  | 0.66 | 0  | 32               | 32               | 32               | 6,590,995    | ChIP  | yes                            |
| Smeenk et al. 2011               | human   | U2OS-p53-pS46-ActD              | 0.92       | 1.63 | 0.29 | -1 | 32               | 32               | 32               | 5,408,031    | ChIP  | yes                            |
| Smeenk et al. 2011               | human   | U2OS-p53-pS46-Eto               | 0.94       | 1.84 | 0.47 | -1 | 32               | 32               | 32               | 5,748,594    | ChIP  | yes                            |
| Ceol et al. 2011                 | human   | WM262-MCAF1                     | 0.45       | 3.9  | 1.5  | 1  | 36               | 36               | 36               | 13,346,938   | ChIP  | yes                            |
| Ceol et al. 2011                 | human   | WM262-SetDB1                    | 0.54       | 1.49 | 0.62 | 0  | 36               | 36               | 36               | 5,307,748    | ChIP  | yes                            |
| Ceol et al. 2011                 | human   | Wm451-lu-SetDB1                 | 0.39       | 1.39 | 0.67 | 0  | 36               | 36               | 36               | 6,295,121    | ChIP  | yes                            |
| Wu et al. 2011a; Wu et al. 2011b | mouse   | mES-IgG-exp1-no-KD              | 0.67       | 1.62 | 1.07 | 1  | 25               | 25               | 25               | 23,036,303   | IgG   | no                             |
| Wu et al. 2011a; Wu et al. 2011b | mouse   | mES-IgG-exp2-mock-KD            | 0.52       | 2.04 | 1.4  | 1  | 36               | 36               | 36               | 8,283,677    | IgG   | no                             |
| Wu et al. 2011a; Wu et al. 2011b | mouse   | mES-Tet1-exp1-no-KD             | 0.91       | 1.33 | 1.25 | 1  | 25               | 25               | 25               | 28,536,436   | ChIP  | yes                            |
| Wu et al. 2011a; Wu et al. 2011b | mouse   | mES-Tet1-exp2-mock-KD           | 0.89       | 1.54 | 1    | 0  | 36               | 36               | 36               | 9,521,384    | ChIP  | yes                            |
| Wu et al. 2011a; Wu et al. 2011b | mouse   | mES-Tet1-exp3-Tet1-KD           | 0.9        | 1.33 | 1.06 | 1  | 25               | 25               | 25               | 28,297,858   | ChIP  | no                             |
| Wu et al. 2011a; Wu et al. 2011b | mouse   | mES-Tet1-exp4-Tet1-KD           | 0.56       | 1.71 | 0.5  | 0  | 25               | 25               | 25               | 4,286,921    | ChIP  | no                             |
| Horiuchi et al. 2011             | mouse   | Th1-1-Input                     | 0.84       | 1.4  | 0.36 | -1 | 36               | 36               | 36               | 5,981,126    | Input | no                             |
| Horiuchi et al. 2011             | mouse   | Th1-2-Input                     | 0.88       | 2.25 | 1.22 | 1  | 36               | 36               | 36               | 4,609,331    | Input | no                             |
| Horiuchi et al. 2011             | mouse   | Th1-GATA3                       | 0.94       | 1.81 | 0.62 | 0  | 36               | 36               | 36               | 7,219,267    | ChIP  | no                             |
| Horiuchi et al. 2011             | mouse   | Th1-IgG                         | 0.78       | 2.37 | 1.02 | 1  | 36               | 36               | 36               | 11,136,690   | IgG   | no                             |
| Horiuchi et al. 2011             | mouse   | Th2-1-Input                     | 0.81       | 1.58 | 0.42 | -1 | 36               | 36               | 36               | 5,428,949    | Input | no                             |
| Horiuchi et al. 2011             | mouse   | Th2-2-Input                     | 0.88       | 2.28 | 1.33 | 1  | 36               | 36               | 36               | 4,095,787    | Input | no                             |
| Horiuchi et al. 2011             | mouse   | Th2-GATA3                       | 0.91       | 1.49 | 0.41 | -1 | 36               | 36               | 36               | 6,332,390    | ChIP  | yes                            |
| Horiuchi et al. 2011             | mouse   | Th2-IgG                         | 0.77       | 1.26 | 0.25 | -2 | 36               | 36               | 36               | 11,532,524   | IgG   | no                             |
| Soccio et al. 2011               | human   | Human-Adipocytes-Input-rep1-GAI | 0.38       | 1.43 | 0.56 | 0  | 38               | 38               | 38               | 23,331,240   | Input | no                             |
| Soccio et al. 2011               | human   | Human-Adipocytes-PPARG-rep1-GAI | 0.21       | 2.69 | 0.65 | 0  | 38               | 38               | 38               | 17,934,158   | ChIP  | yes                            |

Continued on next page



Table S1 – Continued from previous page

| Source               | Species | Library                         | Complexity | NSC   | RSC  | QC | Ave. Read Length | Max. Read Length | Min. Read Length | Mapped reads | Type  | Should exhibit read clustering |
|----------------------|---------|---------------------------------|------------|-------|------|----|------------------|------------------|------------------|--------------|-------|--------------------------------|
| Soccio et al. 2011   | human   | Human-Adipocytes-PPARg-rep2-GAI | 0.71       | 1.95  | 0.56 | 0  | 40               | 40               | 40               | 19,418,441   | ChIP  | yes                            |
| Soccio et al. 2011   | human   | Human-Liver-FOXA2-rep1-GAI-1    | 0.89       | 2.46  | 0.26 | -1 | 32               | 32               | 32               | 3,597,158    | ChIP  | yes                            |
| Soccio et al. 2011   | human   | Human-Liver-FOXA2-rep1-GAI      | 0.87       | 1.84  | 0.29 | -1 | 36               | 36               | 36               | 6,591,761    | ChIP  | yes                            |
| Soccio et al. 2011   | human   | Human-Liver-FOXA2-rep2-GAI-1    | 0.89       | 2.41  | 0.26 | -1 | 32               | 32               | 32               | 3,559,308    | ChIP  | yes                            |
| Soccio et al. 2011   | human   | Human-Liver-FOXA2-rep2-GAI      | 0.8        | 2.73  | 0.44 | -1 | 36               | 36               | 36               | 6,415,023    | ChIP  | yes                            |
| Soccio et al. 2011   | human   | Human-Liver-Input-rep1-GAI      | 0.98       | 1.57  | 0.13 | -2 | 36               | 36               | 36               | 4,853,927    | Input | no                             |
| Soccio et al. 2011   | human   | Human-Liver-Input-rep1-GAI      | 0.96       | 1.27  | 0.11 | -2 | 32               | 32               | 32               | 2,775,576    | Input | no                             |
| Soccio et al. 2011   | human   | Human-Liver-Input-rep2-GAI      | 0.96       | 1.49  | 0.11 | -2 | 32               | 32               | 32               | 2,636,496    | Input | no                             |
| Soccio et al. 2011   | mouse   | Mouse-Adipocytes-PPARg-rep2-GAI | 0.68       | 1.69  | 0.91 | 0  | 36               | 36               | 36               | 16,907,011   | ChIP  | yes                            |
| Soccio et al. 2011   | mouse   | Mouse-Liver-FOXA2-rep1-GAI      | 0.87       | 3.47  | 0.35 | -1 | 36               | 36               | 36               | 2,288,906    | ChIP  | yes                            |
| Soccio et al. 2011   | mouse   | Mouse-Liver-FOXA2-rep2-GAI      | 0.77       | 4.67  | 0.6  | 0  | 36               | 36               | 36               | 2,986,172    | ChIP  | yes                            |
| Soccio et al. 2011   | mouse   | Mouse-Liver-FOXA2-rep3-GAI      | 0.56       | 3.79  | 0.46 | -1 | 36               | 36               | 36               | 7,770,167    | ChIP  | yes                            |
| Soccio et al. 2011   | mouse   | Mouse-Liver-FOXA2-rep3-GAI      | 0.81       | 3.35  | 0.83 | 0  | 36               | 36               | 36               | 2,686,815    | ChIP  | yes                            |
| Soccio et al. 2011   | mouse   | Mouse-Liver-FOXA2-rep4-GAI      | 0.46       | 3.39  | 0.32 | -1 | 36               | 36               | 36               | 7,311,631    | ChIP  | yes                            |
| Soccio et al. 2011   | mouse   | Mouse-Liver-FOXA2-rep4-GAI      | 0.84       | 5.04  | 1.06 | 1  | 36               | 36               | 36               | 1,701,117    | ChIP  | yes                            |
| Soccio et al. 2011   | mouse   | Mouse-Liver-Input-rep1-GAI      | 0.91       | 2.15  | 0.32 | -1 | 36               | 36               | 36               | 3,658,469    | Input | no                             |
| Soccio et al. 2011   | mouse   | Mouse-Liver-Input-rep2-GAI      | 0.91       | 2.34  | 0.4  | -1 | 36               | 36               | 36               | 3,808,896    | Input | no                             |
| Soccio et al. 2011   | mouse   | Mouse-Liver-Input-rep3-GAI      | 0.89       | 2.36  | 0.4  | -1 | 36               | 36               | 36               | 3,849,533    | Input | no                             |
| Ang et al. 2011      | mouse   | CCE-mES-Input                   | 0.94       | 1.18  | 0.37 | -1 | 36               | 36               | 36               | 20,085,978   | Input | no                             |
| Ang et al. 2011      | mouse   | CCE-mES-Negative                | 0.78       | 4.01  | 1.06 | 1  | 36               | 36               | 36               | 5,894,488    | Input | no                             |
| Ang et al. 2011      | mouse   | CCE-mES-Oct4                    | 0.97       | 1.58  | 0.55 | 0  | 36               | 36               | 36               | 4,368,039    | ChIP  | yes                            |
| Ang et al. 2011      | mouse   | CCE-mES-Rbbp5                   | 0.85       | 1.1   | 0.14 | -2 | 36               | 36               | 36               | 20,687,485   | ChIP  | yes                            |
| Ang et al. 2011      | mouse   | CCE-mES-Wdr5                    | 0.39       | 2.95  | 1.05 | 1  | 36               | 36               | 36               | 18,192,088   | ChIP  | yes                            |
| Ang et al. 2011      | mouse   | CCE-mES-WDR5-FL                 | 0.93       | 2.09  | 0.89 | 0  | 36               | 36               | 36               | 9,435,450    | ChIP  | yes                            |
| Verzi et al. 2011    | mouse   | Jejunum-villus-cells-Cdx2       | 0.87       | 3.18  | 1.4  | 1  | 40               | 40               | 40               | 5,335,016    | ChIP  | yes                            |
| Verzi et al. 2011    | mouse   | Jejunum-villus-cells-Input      | 0.91       | 1.92  | 0.76 | 0  | 40               | 40               | 40               | 5,579,736    | Input | no                             |
| Wang et al. 2011     | human   | LNCaP-AR-dht-siCTRL             | 0.94       | 1.31  | 0.3  | -1 | 25               | 25               | 25               | 12,537,593   | ChIP  | yes                            |
| Wang et al. 2011     | human   | LNCaP-AR-dht-siFoxA1            | 0.96       | 2.25  | 1.64 | 2  | 25               | 25               | 25               | 7,690,074    | ChIP  | unknown                        |
| Wang et al. 2011     | human   | LNCaP-FoxA1-dht-siCTRL          | 0.95       | 5.46  | 5.19 | 2  | 22               | 22               | 22               | 7,796,027    | ChIP  | yes                            |
| Wang et al. 2011     | human   | LNCaP-FoxA1-vehicle-siCTRL      | 0.95       | 3.88  | 3    | 2  | 22               | 22               | 22               | 7,780,805    | ChIP  | yes                            |
| Wang et al. 2011     | human   | LNCaP-input-dht-1               | 0.98       | 1.48  | 0.58 | 0  | 36               | 36               | 36               | 4,211,736    | Input | no                             |
| Wang et al. 2011     | human   | LNCaP-MED12-dht-siCTRL          | 0.98       | 1.53  | 0.45 | -1 | 36               | 36               | 36               | 4,305,257    | ChIP  | yes                            |
| Wang et al. 2011     | human   | LNCaP-MED12-dht-siFoxA1         | 0.96       | 1.55  | 0.46 | -1 | 28               | 28               | 28               | 17,506,375   | ChIP  | yes                            |
| Wang et al. 2011     | human   | LNCaP-p300-dht-siCTRL           | 0.98       | 1.59  | 0.51 | 0  | 36               | 36               | 36               | 3,133,925    | ChIP  | yes                            |
| Wang et al. 2011     | human   | LNCaP-p300-dht-siFoxA1          | 0.98       | 1.62  | 0.53 | 0  | 36               | 36               | 36               | 3,120,380    | ChIP  | yes                            |
| Nitzsche et al. 2011 | mouse   | mESC-CTCF-GFP                   | 0.95       | 2.74  | 2.78 | 2  | 35               | 35               | 35               | 9,433,929    | ChIP  | yes                            |
| Nitzsche et al. 2011 | mouse   | mESC-IgG                        | 0.94       | 1.92  | 0.8  | 0  | 35               | 35               | 35               | 9,008,251    | IgG   | no                             |
| Nitzsche et al. 2011 | mouse   | EB-Rad21-GFP                    | 0.93       | 2.51  | 1.93 | 2  | 35               | 35               | 35               | 9,039,705    | ChIP  | yes                            |
| Nitzsche et al. 2011 | mouse   | EB-Rad21-GFP-IgG                | 0.91       | 2.25  | 1.19 | 1  | 35               | 35               | 35               | 8,488,336    | IgG   | no                             |
| Nitzsche et al. 2011 | mouse   | mESC-Rad21-GFP                  | 0.92       | 2.38  | 2.86 | 2  | 35               | 35               | 35               | 20,118,696   | ChIP  | yes                            |
| Nitzsche et al. 2011 | mouse   | mESC-Rad21-GFP-IgG              | 0.91       | 2.12  | 1.86 | 2  | 35               | 35               | 35               | 18,171,398   | IgG   | no                             |
| Kim et al. 2011      | human   | Endoderm-FOXH1-pool             | 0.95       | 6.88  | 1.72 | 2  | 36               | 36               | 36               | 11,630,871   | ChIP  | yes                            |
| Kim et al. 2011      | human   | Endoderm-Input                  | 0.97       | 1.45  | 0.69 | 0  | 36               | 36               | 36               | 16,775,681   | Input | no                             |
| Kim et al. 2011      | human   | Endoderm-SMAD2-3-A-pool         | 0.98       | 1.69  | 0.71 | 0  | 36               | 36               | 36               | 10,591,855   | ChIP  | yes                            |
| Kim et al. 2011      | human   | Endoderm-SMAD2-3-B-rep1         | 0.98       | 2.65  | 1.02 | 1  | 36               | 36               | 36               | 6,467,438    | ChIP  | yes                            |
| Kim et al. 2011      | human   | Endoderm-SMAD3-rep1             | 0.98       | 1.86  | 0.63 | 0  | 36               | 36               | 36               | 6,664,422    | ChIP  | yes                            |
| Kim et al. 2011      | human   | Endoderm-SMAD4-rep1             | 0.98       | 2.4   | 0.98 | 0  | 36               | 36               | 36               | 6,664,039    | ChIP  | yes                            |
| Kim et al. 2011      | human   | hESC-FOXH1-pool-1               | 0.97       | 3.21  | 1.37 | 1  | 36               | 36               | 36               | 11,570,426   | ChIP  | yes                            |
| Kim et al. 2011      | human   | hESC-Input-1                    | 0.65       | 1.53  | 0.51 | 0  | 36               | 36               | 36               | 30,699,298   | Input | no                             |
| Kim et al. 2011      | human   | hESC-SMAD2-3-A-pool             | 0.98       | 1.88  | 0.9  | 0  | 36               | 36               | 36               | 11,364,210   | ChIP  | yes                            |
| Kim et al. 2011      | human   | hESC-SMAD2-3-B-rep1             | 0.97       | 2.3   | 0.93 | 0  | 36               | 36               | 36               | 9,667,298    | ChIP  | yes                            |
| Kim et al. 2011      | human   | hESC-SMAD3-rep1                 | 0.98       | 1.78  | 0.81 | 0  | 36               | 36               | 36               | 7,743,314    | ChIP  | yes                            |
| Kim et al. 2011      | human   | hESC-SMAD4-rep1                 | 0.96       | 1.89  | 0.75 | 0  | 36               | 36               | 36               | 10,007,703   | ChIP  | yes                            |
| Lo et al. 2011       | human   | Adipocytes-CEBPa                | 0.4        | 15.56 | 0.55 | 0  | 35               | 35               | 35               | 1,285,131    | ChIP  | yes                            |
| Lo et al. 2011       | human   | Adipocytes-E2F4                 | 0.89       | 13.68 | 0.2  | -2 | 35               | 35               | 35               | 64,667       | ChIP  | yes                            |
| Lo et al. 2011       | human   | Adipocytes-HSF1                 | 0.74       | 6.03  | 0.05 | -2 | 35               | 35               | 35               | 177,695      | ChIP  | yes                            |
| Lo et al. 2011       | human   | Adipocytes-IgG                  | 0.71       | 21.81 | 0.12 | -2 | 35               | 35               | 35               | 282,753      | IgG   | no                             |
| Tijssen et al. 2011  | human   | Megakaryocytes-FLH1             | 0.95       | 2.17  | 0.9  | 0  | 54               | 54               | 54               | 12,154,848   | ChIP  | yes                            |
| Tijssen et al. 2011  | human   | Megakaryocytes-GATA1            | 0.92       | 2.75  | 1.05 | 1  | 37               | 37               | 37               | 12,848,211   | ChIP  | yes                            |
| Tijssen et al. 2011  | human   | Megakaryocytes-GATA2            | 0.95       | 2.3   | 0.83 | 0  | 54               | 54               | 54               | 8,984,141    | ChIP  | yes                            |
| Tijssen et al. 2011  | human   | Megakaryocytes-IgG              | 0.68       | 2.11  | 0.89 | 0  | 37               | 37               | 37               | 13,241,658   | IgG   | no                             |
| Tijssen et al. 2011  | human   | Megakaryocytes-RUNX1            | 0.97       | 8.42  | 2.6  | 2  | 54               | 54               | 54               | 10,822,021   | ChIP  | yes                            |
| Tijssen et al. 2011  | human   | Megakaryocytes-SCL              | 0.96       | 1.34  | 0.26 | -1 | 54               | 54               | 54               | 11,782,604   | ChIP  | yes                            |
| Tan et al. 2011      | human   | MCF7-E2-AP2g                    | 0.94       | 3.36  | 1.94 | 2  | 36               | 36               | 36               | 13,328,869   | ChIP  | yes                            |
| Tan et al. 2011      | human   | MCF7-E2-FoxA1                   | 0.93       | 6.24  | 2.32 | 2  | 36               | 36               | 36               | 14,308,936   | ChIP  | yes                            |
| Tan et al. 2011      | human   | MCF7-EtOH-AP2g                  | 0.95       | 3.31  | 2.03 | 2  | 36               | 36               | 36               | 13,306,339   | ChIP  | yes                            |
| Tan et al. 2011      | human   | MCF7-EtOH-FoxA1                 | 0.92       | 6.76  | 2.13 | 2  | 36               | 36               | 36               | 17,586,631   | ChIP  | yes                            |
| Handoko et al. 2011  | mouse   | E14-mES-CTCF                    | 0.8        | 26.13 | 2.04 | 2  | 37               | 37               | 37               | 14,006,006   | ChIP  | yes                            |
| Handoko et al. 2011  | mouse   | E14-mES-Input                   | 0.96       | 1.17  | 0.18 | -2 | 37               | 37               | 37               | 9,567,449    | Input | no                             |

Continued on next page

Table S1 – Continued from previous page

| Source                | Species  | Library                  | Complexity | NSC   | RSC  | QC  | Ave. Read Length | Max. Read Length | Min. Read Length | Mapped reads | Type  | Should exhibit read clustering |
|-----------------------|----------|--------------------------|------------|-------|------|-----|------------------|------------------|------------------|--------------|-------|--------------------------------|
| Handoko et al. 2011   | mouse    | E14-mES-LaminB           | 0.89       | 1.45  | 0.8  | 0   | 36               | 36               | 36               | 15,336,482   | ChIP  | yes                            |
| Handoko et al. 2011   | mouse    | E14-mES-p300             | 0.96       | 1.35  | 0.73 | 0   | 37               | 37               | 37               | 17,677,307   | ChIP  | yes                            |
| Hu et al. 2011        | human    | CD34-WT-Brg1-1           | 0.9        | 2     | 0.77 | 0   | 25               | 25               | 25               | 6,821,309    | ChIP  | yes                            |
| Hu et al. 2011        | human    | CD34-WT-CTCF             | 0.93       | 2.76  | 0.96 | 0   | 25               | 25               | 25               | 6,413,538    | ChIP  | yes                            |
| Hu et al. 2011        | human    | CD34-WT-input            | 0.94       | 1.85  | 0.44 | -1  | 25               | 25               | 25               | 3,838,343    | Input | no                             |
| Hu et al. 2011        | human    | CD34-WT-TAL1             | 0.87       | 1.69  | 0.23 | -2  | 25               | 25               | 25               | 3,089,084    | ChIP  | yes                            |
| Hu et al. 2011        | human    | CD36-shBrg1-CTCF         | 0.9        | 12.03 | 2.57 | 2   | 24.63            | 25               | 24               | 10,427,559   | ChIP  | yes                            |
| Hu et al. 2011        | human    | CD36-shBrg1-GATA1        | 0.92       | 7.21  | 1.78 | 2   | 32.67            | 35               | 25               | 10,380,913   | ChIP  | yes                            |
| Hu et al. 2011        | human    | CD36-shBrg1-input        | 0.8        | 1.34  | 0.46 | -1  | 25               | 25               | 25               | 8,880,654    | Input | no                             |
| Hu et al. 2011        | human    | CD36-shBrg1-TAL1         | 0.97       | 10.44 | 1.8  | 2   | 25               | 25               | 25               | 10,119,729   | ChIP  | yes                            |
| Hu et al. 2011        | human    | CD36-shLuc-CTCF          | 0.81       | 12.76 | 2.53 | 2   | 25               | 25               | 25               | 9,434,898    | ChIP  | yes                            |
| Hu et al. 2011        | human    | CD36-shLuc-GATA1         | 0.89       | 6.8   | 1.84 | 2   | 25               | 25               | 25               | 13,602,919   | ChIP  | yes                            |
| Hu et al. 2011        | human    | CD36-shLuc-input         | 0.62       | 1.36  | 0.46 | -1  | 25               | 25               | 25               | 10,984,175   | Input | no                             |
| Hu et al. 2011        | human    | CD36-shLuc-TAL1          | 0.97       | 12.67 | 2    | 2   | 25               | 25               | 25               | 10,455,880   | ChIP  | yes                            |
| Hu et al. 2011        | human    | CD36-WT-Brg1-1           | 0.85       | 1.66  | 0.56 | 0   | 25               | 25               | 25               | 13,673,639   | ChIP  | yes                            |
| Hu et al. 2011        | human    | CD36-WT-input-1          | 0.8        | 2.53  | 1.05 | 1   | 25               | 25               | 25               | 10,309,351   | Input | no                             |
| Zhao et al. 2011      | human    | IB4-EBNA2-rep1           | 0.94       | 1.91  | 0.3  | -1  | 36               | 36               | 36               | 5,803,658    | ChIP  | yes                            |
| Zhao et al. 2011      | human    | IB4-EBNA2-rep2           | 0.95       | 2.87  | 1.03 | 1   | 40               | 40               | 40               | 5,536,068    | ChIP  | yes                            |
| Zhao et al. 2011      | human    | IB4-Input-rep1           | 0.98       | 1.38  | 0.3  | -1  | 40               | 40               | 40               | 4,144,311    | Input | no                             |
| Zhao et al. 2011      | human    | IB4-Input-rep2           | 0.96       | 1.27  | 0.3  | -1  | 40               | 40               | 40               | 10,404,527   | Input | no                             |
| Zhao et al. 2011      | human    | IB4-RBPJ-rep1            | 0.98       | 2.48  | 0.6  | 0   | 36               | 36               | 36               | 2,919,539    | ChIP  | yes                            |
| Zhao et al. 2011      | human    | IB4-RBPJ-rep2            | 0.93       | 3.03  | 1.26 | 1   | 40               | 40               | 40               | 7,475,552    | ChIP  | yes                            |
| Rao et al. 2011       | human    | HeLaB2-GR-DMSO-GRKD      | 0.39       | 8.06  | 6.32 | 2   | 35               | 35               | 35               | 25,313,813   | ChIP  | no                             |
| Rao et al. 2011       | human    | HeLaB2-GR-DMSO-p65KD     | 0.96       | 4.84  | 4.97 | 2   | 35               | 35               | 35               | 12,286,932   | ChIP  | unknown                        |
| Rao et al. 2011       | human    | HeLaB2-GR-DMSO-WT        | 0.6        | 1.35  | 0.51 | 0   | 35               | 35               | 35               | 26,883,356   | ChIP  | unknown                        |
| Rao et al. 2011       | human    | HeLaB2-GR-TA-WT          | 0.95       | 1.82  | 1.14 | 1   | 35               | 35               | 35               | 13,061,670   | ChIP  | unknown                        |
| Rao et al. 2011       | human    | HeLaB2-GR-TA+TNFa-GRKD   | 0.55       | 3.84  | 3.05 | 2   | 35               | 35               | 35               | 23,851,932   | ChIP  | unknown                        |
| Rao et al. 2011       | human    | HeLaB2-GR-TA+TNFa-p65KD  | 0.96       | 5.27  | 2.96 | 2   | 35               | 35               | 35               | 13,570,984   | ChIP  | unknown                        |
| Rao et al. 2011       | human    | HeLaB2-GR-TA+TNFa-WT     | 0.66       | 1.63  | 0.99 | 0   | 35               | 35               | 35               | 27,313,718   | ChIP  | unknown                        |
| Rao et al. 2011       | human    | HeLaB2-GR-TNFa-WT        | 0.96       | 1.29  | 0.47 | -1  | 35               | 35               | 35               | 13,022,367   | ChIP  | unknown                        |
| Rao et al. 2011       | human    | HeLaB2-p65-DMSO-GRKD     | 0.4        | 7.86  | 7.04 | 2   | 35               | 35               | 35               | 25,556,594   | ChIP  | no                             |
| Rao et al. 2011       | human    | HeLaB2-p65-DMSO-p65KD    | 0.92       | 5.12  | 3.33 | 2   | 35               | 35               | 35               | 15,380,858   | ChIP  | no                             |
| Rao et al. 2011       | human    | HeLaB2-p65-DMSO-WT       | 0.52       | 1.73  | 0.99 | 0   | 35               | 35               | 35               | 17,693,337   | ChIP  | no                             |
| Rao et al. 2011       | human    | HeLaB2-p65-TA-WT         | 0.93       | 1.66  | 1.03 | 1   | 35               | 35               | 35               | 16,120,222   | ChIP  | yes                            |
| Rao et al. 2011       | human    | HeLaB2-p65-TA+TNFa-GRKD  | 0.58       | 4.86  | 4.49 | 2   | 35               | 35               | 35               | 25,972,505   | ChIP  | yes                            |
| Rao et al. 2011       | human    | HeLaB2-p65-TA+TNFa-p65KD | 0.93       | 3.97  | 4.16 | 2   | 35               | 35               | 35               | 16,624,445   | ChIP  | no                             |
| Rao et al. 2011       | human    | HeLaB2-p65-TA+TNFa-WT    | 0.67       | 2.29  | 1.67 | 2   | 35               | 35               | 35               | 26,290,176   | ChIP  | yes                            |
| Rao et al. 2011       | human    | HeLaB2-p65-TNFa-WT       | 0.93       | 2.31  | 1.83 | 2   | 35               | 35               | 35               | 16,380,803   | ChIP  | yes                            |
| Wang et al. 2011      | human    | CUTLL-Input-1            | 0.98       | 1.24  | 0.42 | -1  | 40               | 40               | 40               | 19,896,199   | Input | no                             |
| Wang et al. 2011      | human    | CUTLL-Input-2            | 0.98       | 1.29  | 0.51 | 0   | 40               | 40               | 40               | 20,712,816   | Input | no                             |
| Wang et al. 2011      | human    | CUTLL-Notch1-1           | 0.97       | 2.44  | 1.03 | 1   | 40               | 40               | 40               | 19,820,660   | ChIP  | yes                            |
| Wang et al. 2011      | human    | CUTLL-Notch1-2           | 0.93       | 4.98  | 1.27 | 1   | 40               | 40               | 40               | 15,252,998   | ChIP  | yes                            |
| Wang et al. 2011      | human    | CUTLL-RBPJ-1             | 0.97       | 1.57  | 0.69 | 0   | 40               | 40               | 40               | 20,226,038   | ChIP  | yes                            |
| Wang et al. 2011      | human    | CUTLL-RBPJ-2             | 0.9        | 3.1   | 1.06 | 1   | 40               | 40               | 40               | 17,569,147   | ChIP  | yes                            |
| Wang et al. 2011      | human    | CUTLL-ZNF143             | 0.8        | 7.23  | 1.9  | 2   | 40               | 40               | 40               | 25,444,869   | ChIP  | yes                            |
| Wang et al. 2011      | mouse    | G4A2-Input               | 0.6        | 1.99  | 1.14 | 1   | 39               | 39               | 39               | 21,212,246   | Input | no                             |
| Wang et al. 2011      | mouse    | G4A2-Notch1              | 0.73       | 2.24  | 1.62 | 2   | 39               | 39               | 39               | 27,613,376   | ChIP  | yes                            |
| Wang et al. 2011      | mouse    | G4A2-RBPJ                | 0.89       | 1.53  | 1.03 | 1   | 40               | 40               | 40               | 12,929,417   | ChIP  | yes                            |
| Wang et al. 2011      | mouse    | T6E-Input                | 0.96       | 1.24  | 0.76 | 0   | 38               | 38               | 38               | 24,179,307   | Input | no                             |
| Wang et al. 2011      | mouse    | T6E-Notch1               | 0.92       | 2.22  | 1.15 | 1   | 38               | 38               | 38               | 21,336,323   | ChIP  | yes                            |
| Wang et al. 2011      | mouse    | T6E-RBPJ                 | 0.93       | 1.74  | 0.87 | 0   | 38               | 38               | 38               | 16,046,706   | ChIP  | yes                            |
| Costessi et al. 2011  | human    | K562-NFYA                | 0.78       | 4.8   | 6.12 | 2   | 35               | 35               | 35               | 11,661,523   | ChIP  | yes                            |
| Costessi et al. 2011  | human    | K562-NFYB                | 0.58       | 5.4   | 6.13 | 2   | 35               | 35               | 35               | 15,460,623   | ChIP  | yes                            |
| Costessi et al. 2011  | human    | K562-PRAME               | 0.87       | 1.76  | 1.32 | 1   | 35               | 35               | 35               | 6,685,161    | ChIP  | yes                            |
| Costessi et al. 2011  | human    | K562-Preimmune           | 0.9        | 1.67  | 0.84 | 0   | 35               | 35               | 35               | 6,366,475    | IgG   | no                             |
| Miyazaki et al. 2011  | mouse    | E2A-Day0                 | 0.94       | 1.39  | 0.26 | -1  | 36               | 36               | 36               | 9,650,009    | ChIP  | yes                            |
| Miyazaki et al. 2011  | mouse    | E2A-Day2                 | 0.94       | 1.34  | 0.19 | -2  | 36               | 36               | 36               | 8,529,512    | ChIP  | unknown                        |
| Miyazaki et al. 2011  | mouse    | Input                    | 0.89       | 1.4   | 0.24 | -2  | 36               | 36               | 36               | 11,673,268   | Input | no                             |
| GSE26711              | mouse    | C2C12-FLAG               | 0.95       | 1.76  | 0.19 | -2  | 26               | 26               | 26               | 2,144,135    | IgG   | no                             |
| GSE26711              | mouse    | C2C12-FLAG-Msx1          | 0.74       | 2.6   | 1.35 | 1   | 32.58            | 26               | 36               | 4,769,291    | ChIP  | yes                            |
| Sun et al. 2011       | mouse    | MEF-Input                | 0.85       | 1.37  | 0.8  | 0   | 36               | 36               | 36               | 17,709,015   | Input | no                             |
| Sun et al. 2011       | mouse    | MEF-NelfB                | 0.75       | 1.99  | 1.52 | 2   | 36               | 36               | 36               | 16,971,968   | ChIP  | yes                            |
| Heikkinen et al. 2011 | human    | THP1-calcitriol-VDR      | 0.41       | 1.63  | 0.58 | 0   | 36               | 36               | 36               | 26,125,837   | ChIP  | yes                            |
| Heikkinen et al. 2011 | human    | THP1-IgG                 | 0.46       | 1.4   | 0.28 | -1  | 36               | 36               | 36               | 26,578,895   | IgG   | no                             |
| Heikkinen et al. 2011 | human    | THP1-unstimulated-VDR    | 0.4        | 1.37  | 0.32 | -1  | 36               | 36               | 36               | 22,822,851   | ChIP  | no                             |
| Yoon et al. 2011      | xaenopus | Input                    | 0.59       | N/A   | N/A  | N/A | 36               | 36               | 36               | 3,219,500    | Input | no                             |
| Yoon et al. 2011      | xaenopus | Smad2-3                  | 0.93       | N/A   | N/A  | N/A | 36               | 36               | 36               | 8,168,342    | ChIP  | yes                            |
| Mullen et al. 2011    | human    | BGO3-Oct4                | 0.94       | 2.13  | 1.51 | 2   | 36               | 36               | 36               | 7,835,807    | ChIP  | yes                            |
| Mullen et al. 2011    | human    | BGO3-Smad3               | 0.9        | 2.21  | 0.73 | 0   | 36               | 36               | 36               | 10,206,400   | ChIP  | yes                            |
| Mullen et al. 2011    | human    | BGO3-WCE                 | 0.99       | 1.41  | 0.55 | 0   | 36               | 36               | 36               | 8,589,186    | Input | no                             |
| Mullen et al. 2011    | mouse    | ESC-Activin-Smad3        | 0.85       | 1.98  | 0.36 | -1  | 36               | 36               | 36               | 3,469,014    | ChIP  | yes                            |

Continued on next page

Table S1 – Continued from previous page

| Source             | Species | Library                         | Complexity | NSC   | RSC  | QC | Ave. Read Length | Max. Read Length | Min. Read Length | Mapped reads | Type  | Should exhibit read clustering |
|--------------------|---------|---------------------------------|------------|-------|------|----|------------------|------------------|------------------|--------------|-------|--------------------------------|
| Mullen et al. 2011 | mouse   | ESC-Smad2-3-Activin             | 0.85       | 1.97  | 0.35 | -1 | 36               | 36               | 36               | 3,521,351    | ChIP  | yes                            |
| Mullen et al. 2011 | mouse   | ESC-Smad3                       | 0.92       | 1.86  | 0.3  | -1 | 26               | 26               | 26               | 3,650,000    | ChIP  | unknown                        |
| Mullen et al. 2011 | mouse   | mESC-NoMyod1-Day2-Smad3         | 0.84       | 1.67  | 1.74 | 2  | 36               | 36               | 36               | 8,780,818    | ChIP  | yes                            |
| Mullen et al. 2011 | mouse   | mESC-NoMyod1-Day5-Smad3         | 0.64       | 2.84  | 1.43 | 1  | 36               | 36               | 36               | 7,935,259    | ChIP  | yes                            |
| Mullen et al. 2011 | mouse   | mESC-PlusMyod1-Day2-Smad3       | 0.71       | 1.89  | 1.48 | 1  | 36               | 36               | 36               | 13,783,301   | ChIP  | yes                            |
| Mullen et al. 2011 | mouse   | mESC-PlusMyod1-Day5-MyoD-H2Flag | 0.67       | 2.13  | 1.19 | 1  | 36               | 36               | 36               | 12,790,865   | ChIP  | yes                            |
| Mullen et al. 2011 | mouse   | mESC-PlusMyod1-Day5-Smad3       | 0.75       | 1.73  | 1    | 0  | 36               | 36               | 36               | 8,585,103    | ChIP  | yes                            |
| Mullen et al. 2011 | mouse   | Myotubes-IgG                    | 0.65       | 1.98  | 0.75 | 0  | 36               | 36               | 36               | 5,056,829    | IgG   | no                             |
| Mullen et al. 2011 | mouse   | Myotubes-MyoD1-Rep1             | 0.78       | 6.25  | 2.23 | 2  | 36               | 36               | 36               | 4,485,416    | ChIP  | yes                            |
| Mullen et al. 2011 | mouse   | Myotubes-MyoD1-Rep2             | 0.54       | 3.75  | 1.62 | 2  | 36               | 36               | 36               | 14,493,250   | ChIP  | yes                            |
| Mullen et al. 2011 | mouse   | Myotubes-Smad3-Rep1             | 0.68       | 3.39  | 2.15 | 2  | 36               | 36               | 36               | 14,630,938   | ChIP  | yes                            |
| Mullen et al. 2011 | mouse   | Myotubes-Smad3-Rep2             | 0.19       | 2.5   | 2.03 | 2  | 36               | 36               | 36               | 11,953,645   | ChIP  | yes                            |
| Mullen et al. 2011 | mouse   | Pro-Bcells-IgG                  | 0.76       | 3.51  | 1.09 | 1  | 36               | 36               | 36               | 22,066,974   | IgG   | no                             |
| Mullen et al. 2011 | mouse   | Pro-Bcells-PU.1-Rep1            | 0.61       | 4     | 1.75 | 2  | 36               | 36               | 36               | 11,557,346   | ChIP  | yes                            |
| Mullen et al. 2011 | mouse   | Pro-Bcells-PU.1-Rep2            | 0.76       | 6.98  | 1.47 | 1  | 36               | 36               | 36               | 21,066,565   | ChIP  | yes                            |
| Mullen et al. 2011 | mouse   | Pro-Bcells-Smad3-Rep1           | 0.68       | 1.84  | 1.26 | 1  | 36               | 36               | 36               | 13,801,014   | ChIP  | yes                            |
| Mullen et al. 2011 | mouse   | Pro-Bcells-Smad3-Rep2           | 0.74       | 4.61  | 2.45 | 2  | 36               | 36               | 36               | 13,745,867   | ChIP  | yes                            |
| Wei et al. 2011    | mouse   | CD4-Gata3                       | 0.5        | 3.55  | 1.68 | 2  | 25               | 26               | 25               | 5,311,260    | ChIP  | yes                            |
| Wei et al. 2011    | mouse   | CD8-Fli1                        | 0.64       | 1.78  | 0.91 | 0  | 25               | 25               | 25               | 4,267,162    | ChIP  | unknown                        |
| Wei et al. 2011    | mouse   | CD8-Gata3                       | 0.8        | 1.9   | 1.08 | 1  | 25               | 25               | 25               | 4,827,087    | ChIP  | yes                            |
| Wei et al. 2011    | mouse   | CD8-Gata3-KO-Fli1               | 0.95       | 1.49  | 0.69 | 0  | 25               | 25               | 25               | 3,152,001    | ChIP  | unknown                        |
| Wei et al. 2011    | mouse   | CD8-Gata3-KO-Gata3              | 0.92       | 1.32  | 0.4  | -1 | 25               | 25               | 25               | 1,997,286    | ChIP  | yes                            |
| Wei et al. 2011    | mouse   | DN-Gata3                        | 0.66       | 2.87  | 1.68 | 2  | 25               | 25               | 25               | 6,301,966    | ChIP  | yes                            |
| Wei et al. 2011    | mouse   | DP-Gata3                        | 0.76       | 1.86  | 1.14 | 1  | 25               | 25               | 25               | 6,402,211    | ChIP  | yes                            |
| Wei et al. 2011    | mouse   | DP-Gata3-replicate              | 0.08       | 14.33 | 7.09 | 2  | 25               | 25               | 25               | 20,563,880   | ChIP  | yes                            |
| Wei et al. 2011    | mouse   | iTreg-Gata3                     | 0.26       | 2.42  | 1.28 | 1  | 25               | 25               | 25               | 7,299,209    | ChIP  | yes                            |
| Wei et al. 2011    | mouse   | NKT-Gata3                       | 0.21       | 16.16 | 2.81 | 2  | 25               | 25               | 25               | 4,716,486    | ChIP  | yes                            |
| Wei et al. 2011    | mouse   | nTreg-Gata3                     | 0.69       | 5.83  | 2.01 | 2  | 25               | 25               | 25               | 4,163,536    | ChIP  | yes                            |
| Wei et al. 2011    | mouse   | Th17-Gata3                      | 0.32       | 1.64  | 0.68 | 0  | 25               | 25               | 25               | 5,051,835    | ChIP  | unknown                        |
| Wei et al. 2011    | mouse   | Th1-Gata3                       | 0.67       | 2.79  | 1.53 | 2  | 25               | 25               | 25               | 6,296,541    | ChIP  | yes                            |
| Wei et al. 2011    | mouse   | Th2-Ets1                        | 0.37       | 3.54  | 1.87 | 2  | 25               | 25               | 25               | 1,620,989    | ChIP  | yes                            |
| Wei et al. 2011    | mouse   | Th2-Fli1                        | 0.81       | 4.76  | 0.02 | -2 | 24               | 24               | 24               | 444,327      | ChIP  | yes                            |
| Wei et al. 2011    | mouse   | Th2-Gata3                       | 0.86       | 2.86  | 2.47 | 2  | 25               | 25               | 25               | 7,514,211    | ChIP  | yes                            |
| Wei et al. 2011    | mouse   | Th2-Gata3-replicate             | 0.86       | 2.86  | 2.47 | 2  | 25               | 25               | 25               | 7,514,211    | ChIP  | yes                            |
| Liu et al. 2011    | mouse   | mES-TAF1                        | 0.7        | 1.04  | 0.11 | -2 | 36               | 36               | 36               | 42,959,794   | ChIP  | yes                            |
| Liu et al. 2011    | mouse   | mES-TAF1-IgG                    | 0.66       | 1.1   | 0.27 | -1 | 36               | 36               | 36               | 38,486,238   | IgG   | no                             |
| Liu et al. 2011    | mouse   | mES-TAF3                        | 0.48       | 1.76  | 0.94 | 0  | 36               | 36               | 36               | 37,109,895   | ChIP  | yes                            |
| Liu et al. 2011    | mouse   | mES-TAF3-IgG                    | 0.38       | 1.11  | 0.2  | -2 | 36               | 36               | 36               | 41,265,618   | IgG   | no                             |
| Liu et al. 2011    | mouse   | mES-TBP                         | 0.64       | 2.1   | 0.93 | 0  | 36               | 36               | 36               | 34,110,153   | ChIP  | yes                            |
| Liu et al. 2011    | mouse   | mES-TBP-IgG                     | 0.31       | 1.21  | 0.17 | -2 | 36               | 36               | 36               | 33,960,211   | IgG   | no                             |
| Kong et al. 2011   | human   | MCF7-DMSO-GATA3                 | 0.92       | 2.27  | 1.02 | 1  | 36               | 36               | 36               | 16,110,797   | ChIP  | yes                            |
| Kong et al. 2011   | human   | MCF7-DMSO-p300                  | 0.94       | 1.49  | 0.53 | 0  | 36               | 36               | 36               | 16,598,044   | ChIP  | yes                            |
| Kong et al. 2011   | human   | MCF7-E2-GATA3                   | 0.94       | 3.42  | 1.43 | 1  | 36               | 36               | 36               | 22,771,157   | ChIP  | yes                            |
| Kong et al. 2011   | human   | MCF7-E2-p300                    | 0.92       | 1.54  | 0.46 | -1 | 36               | 36               | 36               | 12,820,747   | ChIP  | yes                            |
| GSE31951           | mouse   | 0hrKCl-Input-sampleB1           | 0.87       | 2.26  | 0.91 | 0  | 33               | 33               | 33               | 21,405,879   | Input | no                             |
| GSE31951           | mouse   | 0hrKCl-Input-sampleB2           | 0.61       | 1.21  | 0.17 | -2 | 33               | 33               | 33               | 11,303,008   | Input | no                             |
| GSE31951           | mouse   | 0hrKCl-MeCP2IP-sampleB1         | 0.84       | 3.88  | 2.11 | 2  | 33               | 33               | 33               | 34,260,253   | ChIP  | yes                            |
| GSE31951           | mouse   | 0hrKCl-MeCP2IP-sampleB2         | 0.8        | 1.97  | 1.68 | 2  | 33               | 33               | 33               | 14,827,886   | ChIP  | yes                            |
| GSE31951           | mouse   | 2hrKcl-Input-sampleB1           | 0.88       | 1.97  | 0.32 | -1 | 33               | 33               | 33               | 8,725,472    | Input | no                             |
| GSE31951           | mouse   | 2hrKcl-Input-sampleB2           | 0.77       | 1.15  | 0.16 | -2 | 33               | 33               | 33               | 45,501,766   | Input | no                             |
| GSE31951           | mouse   | 2hrKCl-MeCP2IP-sampleB1         | 0.8        | 4.79  | 2.65 | 2  | 33               | 33               | 33               | 13,050,973   | ChIP  | yes                            |
| GSE31951           | mouse   | 2hrKCl-MeCP2IP-sampleB2         | 0.47       | 1.9   | 1.33 | 1  | 33               | 33               | 33               | 9,573,633    | ChIP  | yes                            |
| GSE31951           | mouse   | 2hrKCl-pS421MeCP2IP-sampleB2    | 0.89       | 1.86  | 0.67 | 0  | 33               | 33               | 33               | 3,733,245    | ChIP  | yes                            |
| Norton et al. 2011 | rat     | H4IIE-input                     | 0.75       | 3.28  | 1.41 | 1  | 40               | 40               | 40               | 22,889,534   | Input | no                             |
| Norton et al. 2011 | rat     | H4IIE-TCF7L2                    | 0.81       | 3.08  | 1.14 | 1  | 40               | 40               | 40               | 21,999,570   | ChIP  | yes                            |
| Bernt et al. 2011  | mouse   | MLL-AF9                         | 0.76       | 2.2   | 2.05 | 2  | 36               | 36               | 36               | 20,979,495   | ChIP  | yes                            |
| Sahu et al. 2011   | human   | LNCaP-AR-rep1                   | 0.96       | 2.15  | 0.84 | 0  | 30               | 30               | 30               | 13,178,048   | ChIP  | yes                            |
| Sahu et al. 2011   | human   | LNCaP-AR-rep2                   | 0.97       | 1.71  | 0.69 | 0  | 30               | 30               | 30               | 13,295,369   | ChIP  | yes                            |
| Sahu et al. 2011   | human   | LNCaP-AR-siFoxA1-rep1           | 0.97       | 2.45  | 1.13 | 1  | 30               | 30               | 30               | 16,070,383   | ChIP  | yes                            |
| Sahu et al. 2011   | human   | LNCaP-AR-siFoxA1-rep2           | 0.96       | 2.64  | 1.18 | 1  | 30               | 30               | 30               | 16,077,043   | ChIP  | yes                            |
| Sahu et al. 2011   | human   | LNCaP-FoxA1-rep1                | 0.98       | 3.05  | 1.14 | 1  | 30               | 30               | 30               | 7,592,193    | ChIP  | yes                            |
| Sahu et al. 2011   | human   | LNCaP-FoxA1-rep2                | 0.98       | 3.56  | 1.38 | 1  | 30               | 30               | 30               | 8,058,879    | ChIP  | yes                            |
| Sahu et al. 2011   | human   | LNCaP-FoxA1-siFoxA1-rep1        | 0.97       | 1.77  | 0.44 | -1 | 30               | 30               | 30               | 5,946,745    | ChIP  | no                             |
| Sahu et al. 2011   | human   | LNCaP-FoxA1-siFoxA1-rep2        | 0.97       | 1.76  | 0.42 | -1 | 30               | 30               | 30               | 5,835,884    | ChIP  | no                             |
| Sahu et al. 2011   | human   | LNCaP-GR                        | 0.97       | 1.78  | 0.83 | 0  | 36               | 36               | 36               | 22,124,446   | ChIP  | yes                            |
| Sahu et al. 2011   | human   | LNCaP-GR-siFoxA1                | 0.93       | 1.68  | 0.91 | 0  | 36               | 36               | 36               | 17,943,158   | ChIP  | yes                            |
| Sahu et al. 2011   | human   | LNCaP-rIgG                      | 0.95       | 1.16  | 0.21 | -2 | 30               | 30               | 30               | 16,327,209   | IgG   | no                             |
| An et al. 2011     | mouse   | C2C12-Input-rep1                | 0.95       | 1.13  | 0.48 | -1 | 37               | 37               | 37               | 17,130,843   | Input | no                             |
| An et al. 2011     | mouse   | C2C12-Input-rep2                | 0.94       | 1.1   | 0.5  | -1 | 40               | 40               | 40               | 24,457,563   | Input | no                             |
| An et al. 2011     | mouse   | C2C12-Sox6-rep1                 | 0.92       | 2.16  | 0.39 | -1 | 40               | 40               | 40               | 2,989,595    | ChIP  | yes                            |

Continued on next page

Table S1 – Continued from previous page

| Source                 | Species | Library                         | Complexity | NSC   | RSC  | QC | Ave. Read Length | Max. Read Length | Min. Read Length | Mapped reads | Type  | Should exhibit read clustering |
|------------------------|---------|---------------------------------|------------|-------|------|----|------------------|------------------|------------------|--------------|-------|--------------------------------|
| An et al. 2011         | mouse   | C2C12-Sox6-rep2                 | 0.96       | 2.37  | 0.26 | -1 | 40               | 40               | 40               | 1,470,144    | ChIP  | yes                            |
| Shukla et al. 2011     | human   | BJAB-CTCF                       | 0.85       | 3.53  | 1.88 | 2  | 35               | 35               | 35               | 20,488,614   | ChIP  | yes                            |
| Shukla et al. 2011     | human   | BJAB-Rabbit-IgG                 | 0.82       | 3.24  | 2.1  | 2  | 35               | 35               | 35               | 17,746,364   | IgG   | no                             |
| Shukla et al. 2011     | human   | BL41-CTCF                       | 0.81       | 3.63  | 2.27 | 2  | 35               | 35               | 35               | 27,623,415   | ChIP  | yes                            |
| Shukla et al. 2011     | human   | BL41-Rabbit-IgG                 | 0.68       | 4.44  | 3.71 | 2  | 35               | 35               | 35               | 29,655,822   | IgG   | no                             |
| Trompouki et al. 2011* | mouse   | Gata1-G1ERbmp-r1-100914-4       | 0.97       | 1.5   | 0.99 | 0  | 36               | 36               | 36               | 18,435,160   | ChIP  | yes                            |
| Trompouki et al. 2011* | mouse   | Gata2-G1Ebmp-r1-101201-3        | 0.82       | 12.68 | 1.59 | 2  | 36               | 36               | 36               | 8,484,282    | ChIP  | yes                            |
| Trompouki et al. 2011* | mouse   | Smad1-G1Ebmp-r1-100914-6        | 0.8        | 4.78  | 1.52 | 2  | 36               | 36               | 36               | 14,561,496   | ChIP  | yes                            |
| Trompouki et al. 2011* | mouse   | Smad1-G1ERbmp-r1-100914-5       | 0.85       | 4.16  | 1.38 | 1  | 36               | 36               | 36               | 16,186,687   | ChIP  | yes                            |
| Trompouki et al. 2011* | mouse   | WCE-G1Ebmp-r1-101201-2          | 0.97       | 1.43  | 0.92 | 0  | 36               | 36               | 36               | 14,429,966   | Input | no                             |
| Trompouki et al. 2011* | mouse   | WCE-G1ERbio-r1-100914-1         | 0.97       | 1.53  | 0.98 | 0  | 36               | 36               | 36               | 17,835,267   | Input | no                             |
| Trompouki et al. 2011* | human   | GATA1-CD34eryth-bmp-r2-101103-6 | 0.73       | 4.25  | 0.05 | -2 | 36               | 36               | 36               | 94,232       | ChIP  | yes                            |
| Trompouki et al. 2011* | human   | GATA1-CD34eryth-bio-r2-101103-7 | 0.22       | 21.87 | 0.14 | -2 | 36               | 36               | 36               | 744,924      | ChIP  | yes                            |
| Trompouki et al. 2011* | human   | GATA1-CD34eryth-bmp-r1-100922-4 | 0.57       | 10.86 | 0.14 | -2 | 36               | 36               | 36               | 667,864      | ChIP  | yes                            |
| Trompouki et al. 2011* | human   | GATA1-CD34eryth-bmp-r2-101105-1 | 0.49       | 10.81 | 0.15 | -2 | 36               | 36               | 36               | 900,792      | ChIP  | yes                            |
| Trompouki et al. 2011* | human   | GATA2-CD34prog-bmp-r1-101201-1  | 0.59       | 2.91  | 0.05 | -2 | 36               | 36               | 36               | 479,725      | ChIP  | yes                            |
| Trompouki et al. 2011* | human   | SMAD1-CD34eryth-bmp-r1-100922-5 | 0.65       | 6.9   | 0.07 | -2 | 36               | 36               | 36               | 634,638      | ChIP  | yes                            |
| Trompouki et al. 2011* | human   | SMAD1-CD34eryth-bmp-r2-101103-7 | 0.62       | 9.05  | 0.07 | -2 | 36               | 36               | 36               | 730,479      | ChIP  | yes                            |
| Trompouki et al. 2011* | human   | SMAD1-CD34prog-bmp-r1-100901-1  | 0.68       | 4.26  | 0.06 | -2 | 36               | 36               | 36               | 322,324      | ChIP  | yes                            |
| Trompouki et al. 2011* | human   | SMAD1-CD34prog-bmp-r2-101105-3  | 0.68       | 3.35  | 0.06 | -2 | 36               | 36               | 36               | 620,959      | ChIP  | yes                            |
| Trompouki et al. 2011* | human   | TCF7L2-CD34prog-bio-r1-100826-7 | 0.72       | 3.01  | 0.06 | -2 | 36               | 36               | 36               | 339,258      | ChIP  | yes                            |
| Trompouki et al. 2011* | human   | TCF7L2-CD34prog-bio-r2-101105-4 | 0.64       | 2.96  | 0.07 | -2 | 36               | 36               | 36               | 529,093      | ChIP  | yes                            |
| Trompouki et al. 2011* | human   | WCE-CD34eryth-bio-r1-101103-4   | 0.59       | 19.41 | 0.28 | -1 | 36               | 36               | 36               | 79,783       | Input | no                             |
| Trompouki et al. 2011* | human   | WCE-CD34eryth-bio-r1-101201-4   | 0.54       | 3.54  | 0.05 | -2 | 36               | 36               | 36               | 502,346      | Input | no                             |
| Trompouki et al. 2011* | human   | WCE-CD34eryth-bio-r2-101103-5   | 0.69       | 8.49  | 0.04 | -2 | 36               | 36               | 36               | 340,786      | Input | no                             |
| Trompouki et al. 2011* | human   | WCE-CD34eryth-bmp-r1-100922-3   | 0.69       | 11.24 | 0.05 | -2 | 36               | 36               | 36               | 346,281      | Input | no                             |
| Trompouki et al. 2011* | human   | WCE-CD34eryth-bmp-r2-101105-2   | 0.68       | 10.7  | 0.05 | -2 | 36               | 36               | 36               | 200,293      | Input | no                             |
| Trompouki et al. 2011* | human   | WCE-CD34prog-bio-r1-100826-6    | 0.65       | 2.88  | 0.04 | -2 | 36               | 36               | 36               | 356,819      | Input | no                             |
| Trompouki et al. 2011* | human   | WCE-CD34prog-bio-r1-101201-1    | 0.59       | 2.91  | 0.05 | -2 | 36               | 36               | 36               | 479,725      | Input | no                             |
| Trompouki et al. 2011* | human   | WCE-CD34prog-bio-r2-101105-5    | 0.65       | 2.75  | 0.04 | -2 | 36               | 36               | 36               | 283,167      | Input | no                             |
| Trompouki et al. 2011* | human   | WCE-CD34prog-bmp-r1-101201-7    | 0.6        | 3.13  | 0.05 | -2 | 36               | 36               | 36               | 430,773      | Input | no                             |
| Trompouki et al. 2011* | human   | CEBPA-U937bio-r1-100709-5       | 0.58       | 26.28 | 0.3  | -1 | 35               | 35               | 35               | 4,430,334    | ChIP  | yes                            |
| Trompouki et al. 2011* | human   | CEBPA-U937dmsr-r1-100505-5      | 0.41       | 23.29 | 0.18 | -2 | 36               | 36               | 36               | 151,538      | ChIP  | yes                            |
| Trompouki et al. 2011* | human   | CEBPA-K562-CEBPA-bmp4           | 0.46       | 10.99 | 0.34 | -1 | 35               | 35               | 35               | 2,662,588    | ChIP  | yes                            |
| Trompouki et al. 2011* | human   | CEBPA-U937-bmp4                 | 0.64       | 3.16  | 0.44 | -1 | 36               | 36               | 36               | 228,810      | ChIP  | yes                            |
| Trompouki et al. 2011* | human   | GATA1-K562bio-r1-110325-6       | 0.49       | 11.55 | 0.09 | -2 | 39               | 39               | 39               | 245,220      | ChIP  | yes                            |
| Trompouki et al. 2011* | human   | GATA1-K562bmp-r1-110325-4       | 0.67       | 11.66 | 0.16 | -2 | 36               | 36               | 36               | 335,062      | ChIP  | yes                            |
| Trompouki et al. 2011* | human   | GATA1-K562                      | 0.57       | 3.41  | 0.11 | -2 | 36               | 36               | 36               | 371,785      | ChIP  | yes                            |
| Trompouki et al. 2011* | human   | GATA2-K562bio-r1-110325-5       | 0.51       | 5.76  | 0.13 | -2 | 39               | 39               | 39               | 190,367      | ChIP  | yes                            |
| Trompouki et al. 2011* | human   | GATA2-K562bmp-r1-110325-3       | 0.27       | 5.97  | 0.14 | -2 | 36               | 36               | 36               | 405,703      | ChIP  | yes                            |
| Trompouki et al. 2011* | human   | GATA2-K562                      | 0.47       | 10.43 | 0.02 | -2 | 36               | 36               | 36               | 451,795      | ChIP  | yes                            |
| Trompouki et al. 2011* | human   | Input-K562-CEBPA-bmp4           | 0.08       | 27.04 | 0.2  | -2 | 39               | 39               | 39               | 248,035      | Input | no                             |
| Trompouki et al. 2011* | human   | SMAD1-K562bmp4-r1-100608-2      | 0.75       | 8     | 0.09 | -2 | 35               | 35               | 35               | 834,331      | ChIP  | yes                            |
| Trompouki et al. 2011* | human   | SMAD1-K562campk-r1-110323-2     | 0.71       | 2.48  | 0.14 | -2 | 36               | 36               | 36               | 645,936      | ChIP  | yes                            |
| Trompouki et al. 2011* | human   | SMAD1-U937bmp4-r1-100608-1      | 0.69       | 12.93 | 0.24 | -2 | 36               | 36               | 36               | 1,184,890    | ChIP  | yes                            |
| Trompouki et al. 2011* | human   | SMAD1-K562-CEBPA-bmp4           | 0.83       | 16.08 | 0.21 | -2 | 36               | 36               | 36               | 3,126,161    | ChIP  | yes                            |
| Trompouki et al. 2011* | human   | TCF7L2-K562bio-r1-100106-7      | 0.75       | 10.1  | 0.05 | -2 | 36               | 36               | 36               | 88,763       | ChIP  | yes                            |
| Trompouki et al. 2011* | human   | TCF7L2-K562bio-r2-Childrens     | 0.73       | 5.78  | 0.07 | -2 | 40               | 40               | 40               | 116,187      | ChIP  | yes                            |
| Trompouki et al. 2011* | human   | TCF7L2-U937bio-r1-100505-7      | 0.39       | 11.03 | 0.18 | -2 | 36               | 36               | 36               | 145,311      | ChIP  | yes                            |
| Trompouki et al. 2011* | human   | WCE-K562bio-r1-100106-5         | 0.72       | 8.07  | 0.02 | -2 | 36               | 36               | 36               | 163,001      | Input | no                             |
| Trompouki et al. 2011* | human   | WCE-K562bio-r1-100608-2         | 0.67       | 5.23  | 0.02 | -2 | 36               | 36               | 36               | 314,395      | Input | no                             |
| Trompouki et al. 2011* | human   | WCE-K562bmp4-r1-100608-1        | 0.67       | 8.04  | 0.05 | -2 | 36               | 36               | 36               | 340,757      | Input | no                             |
| Trompouki et al. 2011* | human   | WCE-U937bio-r1-100505-6         | 0.61       | 4.26  | 0.07 | -2 | 36               | 36               | 36               | 294,327      | Input | no                             |
| Trompouki et al. 2011* | human   | WCE-U937bio-r1-100608-5         | 0.64       | 3.52  | 0.06 | -2 | 36               | 36               | 36               | 326,001      | Input | no                             |
| Trompouki et al. 2011* | human   | WCE-U937bio-r1-100709-4         | 0.62       | 3.02  | 0.06 | -2 | 36               | 36               | 36               | 308,988      | Input | no                             |
| Trompouki et al. 2011* | human   | WCE-U937bio-r1-100709-6         | 0.62       | 2.64  | 0.06 | -2 | 36               | 36               | 36               | 299,190      | Input | no                             |
| Trompouki et al. 2011* | human   | WCE-U937bmp4-r1-100608-3        | 0.65       | 3.73  | 0.04 | -2 | 36               | 36               | 36               | 314,568      | Input | no                             |
| Trompouki et al. 2011* | human   | WCE-U937dmsr-r1-100505-3        | 0.63       | 4.64  | 0.07 | -2 | 36               | 36               | 36               | 272,327      | Input | no                             |
| Ceschin et al. 2011    | human   | H3396-CARM1-E2                  | 0.88       | 2.05  | 0.19 | -2 | 49               | 49               | 49               | 99,711       | ChIP  | yes                            |
| Ceschin et al. 2011    | human   | H3396-CARM1-EtOH                | 0.88       | 2.15  | 0.2  | -2 | 49               | 49               | 49               | 105,031      | ChIP  | yes                            |
| Ceschin et al. 2011    | human   | H3396-CBP-E2                    | 0.51       | 4.35  | 0.02 | -2 | 36               | 36               | 36               | 152,170      | ChIP  | yes                            |
| Ceschin et al. 2011    | human   | H3396-CBP-EtOH-1                | 0.33       | 8.51  | 0.06 | -2 | 36               | 36               | 36               | 289,897      | ChIP  | yes                            |
| Ceschin et al. 2011    | human   | H3396-CBPR2151m-E2              | 0.44       | 7.62  | 0.03 | -2 | 36               | 36               | 36               | 168,286      | ChIP  | yes                            |
| Ceschin et al. 2011    | human   | H3396-CBPR2151m-EtOH            | 0.46       | 8.58  | 0.03 | -2 | 36               | 36               | 36               | 149,173      | ChIP  | yes                            |
| Ceschin et al. 2011    | human   | H3396-CBPR742m-E2-1             | 0.39       | 1.93  | 0.07 | -2 | 36               | 36               | 36               | 383,127      | ChIP  | yes                            |
| Ceschin et al. 2011    | human   | H3396-CBPR768m-E2               | 0.41       | 10.17 | 0.04 | -2 | 40               | 40               | 40               | 168,599      | ChIP  | yes                            |
| Ceschin et al. 2011    | human   | H3396-CBPR768m-EtOH             | 0.4        | 3.59  | 0.12 | -2 | 40               | 40               | 40               | 157,261      | ChIP  | yes                            |
| Ceschin et al. 2011    | human   | H3396-ERa-E2                    | 0.47       | 8.8   | 0.01 | -2 | 36               | 36               | 36               | 105,766      | ChIP  | yes                            |
| Ceschin et al. 2011    | human   | H3396-ERa-EtOH                  | 0.51       | 10.95 | 0.02 | -2 | 36               | 36               | 36               | 73,181       | ChIP  | no                             |
| Ceschin et al. 2011    | human   | H3396-Input-E2-repl-1           | 0.71       | 9.46  | 0.03 | -2 | 36               | 36               | 36               | 92,932       | Input | no                             |
| Ceschin et al. 2011    | human   | H3396-RAC3-E2                   | 0.52       | 6.03  | 0.02 | -2 | 36               | 36               | 36               | 110,731      | ChIP  | yes                            |

Continued on next page

Table S1 – Continued from previous page

| Source                  | Species | Library | Complexity                                | NSC  | RSC   | QC    | Ave. Read Length | Max. Read Length | Min. Read Length | Mapped reads | Type       | Should exhibit read clustering |         |
|-------------------------|---------|---------|-------------------------------------------|------|-------|-------|------------------|------------------|------------------|--------------|------------|--------------------------------|---------|
| Mendoza-Parra 2011      | et al.  | mouse   | mouse-F9-WCE                              | 0.87 | 8.28  | 2.79  | 2                | 36               | 36               | 36           | 6,377,439  | Input                          | no      |
| Mendoza-Parra 2011      | et al.  | mouse   | RARg-24h-ATRA                             | 0.87 | 4.27  | 1.95  | 2                | 36               | 36               | 36           | 5,864,836  | ChIP                           | yes     |
| Mendoza-Parra 2011      | et al.  | mouse   | RARg-2h-ATRA                              | 0.87 | 4.27  | 1.92  | 2                | 36               | 36               | 36           | 6,545,542  | ChIP                           | yes     |
| Mendoza-Parra 2011      | et al.  | mouse   | RARg-48h-ATRA                             | 0.91 | 3.46  | 1.82  | 2                | 36               | 36               | 36           | 3,543,638  | ChIP                           | yes     |
| Mendoza-Parra 2011      | et al.  | mouse   | RARg-48h-EtOH                             | 0.8  | 4.55  | 0.93  | 0                | 36               | 36               | 36           | 6,281,297  | ChIP                           | unknown |
| Mendoza-Parra 2011      | et al.  | mouse   | RARg-6h-ATRA                              | 0.65 | 5.31  | 1.93  | 2                | 36               | 36               | 36           | 6,353,453  | ChIP                           | yes     |
| Mendoza-Parra 2011      | et al.  | mouse   | RXRa-24h-ATRA                             | 0.67 | 4.42  | 1.29  | 1                | 36               | 36               | 36           | 6,444,150  | ChIP                           | yes     |
| Mendoza-Parra 2011      | et al.  | mouse   | RXRa-2h-ATRA                              | 0.56 | 9.77  | 3.79  | 2                | 36               | 36               | 36           | 6,676,769  | ChIP                           | yes     |
| Mendoza-Parra 2011      | et al.  | mouse   | RXRa-48h-ATRA                             | 0.6  | 11.1  | 3.89  | 2                | 36               | 36               | 36           | 5,869,783  | ChIP                           | yes     |
| Mendoza-Parra 2011      | et al.  | mouse   | RXRa-48h-EtOH                             | 0.7  | 5.14  | 1.32  | 1                | 36               | 36               | 36           | 6,631,973  | ChIP                           | unknown |
| Mendoza-Parra 2011      | et al.  | mouse   | RXRa-6h-ATRA                              | 0.54 | 7.61  | 3.08  | 2                | 36               | 36               | 36           | 5,834,436  | ChIP                           | yes     |
| Mendoza-Parra 2011      | et al.  | mouse   | rxra-ko-RXRa-48h-ATRA                     | 0.89 | 2.86  | 0.88  | 0                | 36               | 36               | 36           | 4,573,205  | ChIP                           | yes     |
| Schmitz et al. 2011     |         | mouse   | mESC-Jarid1b-1                            | 0.87 | 1.25  | 0.34  | -1               | 34               | 34               | 34           | 3,996,359  | ChIP                           | yes     |
| Schmitz et al. 2011     |         | mouse   | mESC-Jarid1b-2                            | 0.88 | 1.24  | 0.36  | -1               | 26               | 26               | 26           | 3,488,817  | ChIP                           | yes     |
| Bergsland et al. 2011   |         | mouse   | C2C12-Sox3-transfected-Sox3               | 0.77 | 1.44  | 0.85  | 0                | 53               | 53               | 53           | 29,894,751 | ChIP                           | yes     |
| Bergsland et al. 2011   |         | mouse   | Early-formed-neurons-IgG                  | 0.93 | 2.05  | 0.2   | -2               | 33               | 33               | 33           | 2,107,025  | IgG                            | no      |
| Bergsland et al. 2011   |         | mouse   | Early-formed-neurons-Sox11-rep1           | 0.94 | 2.15  | 0.27  | -1               | 33               | 33               | 33           | 2,103,532  | ChIP                           | yes     |
| Bergsland et al. 2011   |         | mouse   | Early-formed-neurons-Sox11-rep2           | 0.95 | 1.99  | 0.27  | -1               | 33               | 33               | 33           | 2,328,712  | ChIP                           | yes     |
| Bergsland et al. 2011   |         | mouse   | Early-formed-neurons-Sox11-rep3           | 0.96 | 1.67  | 0.34  | -1               | 33               | 33               | 33           | 2,668,012  | ChIP                           | yes     |
| Bergsland et al. 2011   |         | mouse   | NPC-Sox2-rep1                             | 0.9  | 1.38  | 0.29  | -1               | 38               | 38               | 38           | 6,840,926  | ChIP                           | yes     |
| Bergsland et al. 2011   |         | mouse   | NPC-Sox2-rep2                             | 0.74 | 1.62  | 0.69  | 0                | 38               | 38               | 38           | 12,391,326 | ChIP                           | yes     |
| Bergsland et al. 2011   |         | mouse   | NPC-Sox2-rep3                             | 0.79 | 1.9   | 1.49  | 1                | 38               | 38               | 38           | 15,894,900 | ChIP                           | yes     |
| Bergsland et al. 2011   |         | mouse   | NPC-Sox3-rep1                             | 0.88 | 2.68  | 1.34  | 1                | 34               | 34               | 34           | 3,339,224  | ChIP                           | yes     |
| Bergsland et al. 2011   |         | mouse   | NPC-Sox3-rep2                             | 0.93 | 2.47  | 0.5   | 0                | 34               | 34               | 34           | 1,464,673  | ChIP                           | yes     |
| Bergsland et al. 2011   |         | mouse   | NPC-Sox3-rep3                             | 0.87 | 2.87  | 2.24  | 2                | 34               | 34               | 34           | 3,496,087  | ChIP                           | yes     |
| Marban et al. 2011      |         | human   | Jurkat-Input                              | 0.96 | 3.11  | 0.77  | 0                | 76               | 76               | 76           | 15,973,065 | Input                          | no      |
| Marban et al. 2011      |         | human   | Jurkat-Tat                                | 0.94 | 4.07  | 1.04  | 1                | 76               | 76               | 76           | 18,900,158 | ChIP                           | yes     |
| Quenneville et al. 2011 |         | mouse   | mESC-HA                                   | 0.67 | 7.09  | 10.49 | 2                | 37.45            | 38               | 37           | 47,077,818 | IgG                            | no      |
| Quenneville et al. 2011 |         | mouse   | mESC-HAZFP57-HA                           | 0.76 | 4.65  | 6.75  | 2                | 37.35            | 38               | 37           | 40,511,425 | ChIP                           | yes     |
| Quenneville et al. 2011 |         | mouse   | mESC-KAP1                                 | 0.63 | 4.31  | 7.86  | 2                | 49.63            | 76               | 38           | 58,793,249 | ChIP                           | yes     |
| Mullican et al. 2011    |         | mouse   | Macrophage-BSA-HDAC3                      | 0.84 | 1.7   | 1.31  | 1                | 38               | 38               | 38           | 18,260,410 | ChIP                           | yes     |
| Mullican et al. 2011    |         | mouse   | Macrophage-IL4-HDAC3                      | 0.89 | 1.64  | 1.18  | 1                | 38               | 38               | 38           | 17,042,856 | ChIP                           | yes     |
| Mullican et al. 2011    |         | mouse   | Macrophage-Input                          | 0.95 | 1.09  | 0.36  | -1               | 36               | 36               | 36           | 19,136,736 | Input                          | no      |
| Brown et al. 2011       |         | human   | hESC-D0-Smad-XL-rep1                      | 0.95 | 1.67  | 0.42  | -1               | 38               | 38               | 38           | 5,323,799  | ChIP                           | yes     |
| Brown et al. 2011       |         | human   | hESC-D0-Smad-XL-rep2                      | 0.72 | 1.44  | 0.51  | 0                | 36               | 36               | 36           | 30,063,231 | ChIP                           | yes     |
| Brown et al. 2011       |         | human   | hESC-D3-Smad-XL-rep1                      | 0.97 | 1.62  | 0.36  | -1               | 38               | 38               | 38           | 6,844,734  | ChIP                           | yes     |
| Brown et al. 2011       |         | human   | hESC-D3-Smad-XL-rep2                      | 0.75 | 1.44  | 0.42  | -1               | 36               | 36               | 36           | 29,936,111 | ChIP                           | yes     |
| Brown et al. 2011       |         | human   | hESC-Input-XL                             | 0.98 | 1.37  | 0.44  | -1               | 36               | 36               | 36           | 7,422,963  | Input                          | no      |
| Mazzoni et al. 2011     |         | mouse   | Progenitor-Motor-Neurons-Day4-iOlig2-V5   | 0.92 | 3.13  | 1.85  | 2                | 36               | 36               | 36           | 3,330,651  | ChIP                           | yes     |
| Mazzoni et al. 2011     |         | mouse   | Progenitor-Motor-Neurons-Day4-Olig2       | 0.9  | 5     | 1.52  | 2                | 36               | 36               | 36           | 8,348,180  | ChIP                           | yes     |
| Mazzoni et al. 2011     |         | mouse   | Progenitor-Motor-Neurons-Day4-V5-control  | 0.93 | 1.48  | 0.48  | -1               | 36               | 36               | 36           | 13,581,601 | Input                          | no      |
| Mazzoni et al. 2011     |         | mouse   | Progenitor-Motor-Neurons-Day5-iFlag-Hoxc9 | 0.87 | 3.68  | 2.59  | 2                | 36               | 36               | 36           | 29,775,081 | ChIP                           | yes     |
| Mazzoni et al. 2011     |         | mouse   | Progenitor-Motor-Neurons-Day5-iHoxc9-V5   | 0.71 | 2.48  | 2.42  | 2                | 69.05            | 76               | 36           | 28,150,488 | ChIP                           | yes     |
| Tan et al. 2011         |         | human   | LNCap-DHT-AR-1                            | 0.83 | 11.17 | 1.68  | 2                | 36               | 36               | 36           | 13,158,813 | ChIP                           | yes     |
| Tan et al. 2011         |         | human   | LNCap-DHT-FoxA1-1                         | 0.89 | 9.94  | 2.58  | 2                | 36               | 36               | 36           | 18,910,797 | ChIP                           | yes     |
| Tan et al. 2011         |         | human   | LNCap-DHT-NKX3-1                          | 0.93 | 1.98  | 0.62  | 0                | 36               | 36               | 36           | 11,840,488 | ChIP                           | yes     |
| Tan et al. 2011         |         | human   | LNCap-EtOH-AR-1                           | 0.92 | 2.71  | 0.92  | 0                | 36               | 36               | 36           | 10,786,161 | ChIP                           | unknown |
| Tan et al. 2011         |         | human   | LNCap-EtOH-FoxA1                          | 0.96 | 9.35  | 2.52  | 2                | 36               | 36               | 36           | 5,367,267  | ChIP                           | yes     |
| Tan et al. 2011         |         | human   | LNCap-EtOH-NKX3-1                         | 0.91 | 1.59  | 0.51  | 0                | 36               | 36               | 36           | 16,850,974 | ChIP                           | yes     |
| Tan et al. 2011         |         | human   | LNCaP-Genomic-Input-1                     | 0.95 | 1.54  | 0.51  | 0                | 36               | 36               | 36           | 10,550,285 | Input                          | no      |
| Shen et al. 2011        |         | mouse   | Heart-input1                              | 0.87 | 1.86  | 0.47  | -1               | 36               | 36               | 36           | 5,928,909  | Input                          | no      |
| Shen et al. 2011        |         | mouse   | Heart-input2                              | 0.95 | 1.38  | 0.41  | -1               | 36               | 36               | 36           | 6,264,090  | Input                          | no      |
| Shen et al. 2011        |         | mouse   | Heart-input3                              | 0.94 | 1.21  | 0.48  | -1               | 36               | 36               | 36           | 10,837,874 | Input                          | no      |
| Shen et al. 2011        |         | mouse   | Heart-Tbx20-GFP                           | 0.95 | 1.9   | 0.63  | 0                | 36               | 36               | 36           | 23,754,878 | ChIP                           | yes     |
| Seitz et al. 2011       |         | human   | BL41-Input                                | 0.98 | 1.19  | 0.1   | -2               | 31               | 31               | 31           | 1,972,404  | Input                          | no      |

Continued on next page

Table S1 – Continued from previous page

| Source                                   | Species   | Library                          | Complexity | NSC   |       |    | RSC |     |    | QC         |       |         | Ave. Read Length | Max. Read Length | Min. Read Length | Mapped reads | Type | Should exhibit read clustering |
|------------------------------------------|-----------|----------------------------------|------------|-------|-------|----|-----|-----|----|------------|-------|---------|------------------|------------------|------------------|--------------|------|--------------------------------|
|                                          |           |                                  |            | NSC   | RSC   | QC | NSC | RSC | QC | NSC        | RSC   | QC      |                  |                  |                  |              |      |                                |
| Seitz et al. 2011                        | human     | BL41-Myc                         | 0.86       | 3.51  | 1.22  | 1  | 33  | 33  | 33 | 2,719,977  | ChIP  | yes     |                  |                  |                  |              |      |                                |
| Seitz et al. 2011                        | human     | Blue1-Input                      | 0.99       | 1.27  | 0.12  | -2 | 31  | 31  | 31 | 1,765,339  | Input | no      |                  |                  |                  |              |      |                                |
| Seitz et al. 2011                        | human     | Blue1-Myc                        | 0.98       | 2.46  | 0.66  | 0  | 31  | 31  | 31 | 1,884,244  | ChIP  | yes     |                  |                  |                  |              |      |                                |
| Seitz et al. 2011                        | human     | CA46-Input                       | 0.98       | 1.2   | 0.13  | -2 | 31  | 31  | 31 | 1,492,644  | Input | no      |                  |                  |                  |              |      |                                |
| Seitz et al. 2011                        | human     | CA46-Myc                         | 0.93       | 1.4   | 0.14  | -2 | 71  | 71  | 71 | 1,734,564  | ChIP  | yes     |                  |                  |                  |              |      |                                |
| Seitz et al. 2011                        | human     | Raji-Input                       | 0.95       | 1.26  | 0.16  | -2 | 34  | 34  | 34 | 3,027,850  | Input | no      |                  |                  |                  |              |      |                                |
| Seitz et al. 2011                        | human     | Raji-Myc                         | 0.82       | 1.22  | 0.25  | -2 | 34  | 34  | 34 | 2,186,015  | ChIP  | yes     |                  |                  |                  |              |      |                                |
| Seitz et al. 2011                        | human     | Ramos-Input                      | 0.98       | 1.2   | 0.14  | -2 | 31  | 31  | 31 | 1,880,856  | Input | no      |                  |                  |                  |              |      |                                |
| Seitz et al. 2011                        | human     | Ramos-Myc                        | 0.94       | 2.09  | 0.61  | 0  | 33  | 33  | 33 | 3,293,975  | ChIP  | yes     |                  |                  |                  |              |      |                                |
| Little et al. 2011                       | human     | C4-2B-Input                      | 0.93       | 1.05  | 0.33  | -1 | 50  | 50  | 50 | 85,985,363 | Input | no      |                  |                  |                  |              |      |                                |
| Little et al. 2011                       | human     | C4-2B-Runx2                      | 0.18       | 2.9   | 3.54  | 2  | 50  | 50  | 50 | 63,645,646 | ChIP  | yes     |                  |                  |                  |              |      |                                |
| Whyte et al. 2011                        | mouse     | mES-CoREST                       | 0.94       | 1.37  | 0.39  | -1 | 36  | 36  | 36 | 9,515,699  | ChIP  | yes     |                  |                  |                  |              |      |                                |
| Whyte et al. 2011                        | mouse     | mES-HDAC1                        | 0.33       | 4.48  | 2.65  | 2  | 36  | 36  | 36 | 17,775,205 | ChIP  | yes     |                  |                  |                  |              |      |                                |
| Whyte et al. 2011                        | mouse     | mES-HDAC1-rep2                   | 0.13       | 2.33  | 1.22  | 1  | 36  | 36  | 36 | 27,399,530 | ChIP  | yes     |                  |                  |                  |              |      |                                |
| Whyte et al. 2011                        | mouse     | mES-HDAC2                        | 0.69       | 2.49  | 1.65  | 2  | 36  | 36  | 36 | 14,740,848 | ChIP  | yes     |                  |                  |                  |              |      |                                |
| Whyte et al. 2011                        | mouse     | mES-HDAC2-rep2                   | 0.16       | 2.29  | 1.74  | 2  | 36  | 36  | 36 | 25,056,680 | ChIP  | yes     |                  |                  |                  |              |      |                                |
| Whyte et al. 2011                        | mouse     | mES-LSD1                         | 0.94       | 1.54  | 0.79  | 0  | 36  | 36  | 36 | 3,907,159  | ChIP  | yes     |                  |                  |                  |              |      |                                |
| Whyte et al. 2011                        | mouse     | mES-LSD1-rep2                    | 0.93       | 2.25  | 1.23  | 1  | 36  | 36  | 36 | 24,506,916 | ChIP  | yes     |                  |                  |                  |              |      |                                |
| Whyte et al. 2011                        | mouse     | mES-Mi-2                         | 0.42       | 1.54  | 0.56  | 0  | 36  | 36  | 36 | 24,712,531 | ChIP  | yes     |                  |                  |                  |              |      |                                |
| Whyte et al. 2011                        | mouse     | mES-Mi-2b                        | 0.95       | 1.27  | 0.45  | -1 | 36  | 36  | 36 | 10,665,386 | ChIP  | yes     |                  |                  |                  |              |      |                                |
| Whyte et al. 2011                        | mouse     | mES-REST                         | 0.73       | 3.31  | 1.57  | 2  | 36  | 36  | 36 | 24,569,235 | ChIP  | yes     |                  |                  |                  |              |      |                                |
| Whyte et al. 2011                        | mouse     | WCE-DMSO-t0                      | 0.71       | 2.01  | 0.9   | 0  | 36  | 36  | 36 | 11,409,350 | Input | no      |                  |                  |                  |              |      |                                |
| Whyte et al. 2011                        | mouse     | WCE-DMSO-t48                     | 0.77       | 2.31  | 1.4   | 1  | 36  | 36  | 36 | 13,324,722 | Input | no      |                  |                  |                  |              |      |                                |
| Whyte et al. 2011                        | mouse     | WCE-TCP-48                       | 0.76       | 2.37  | 1.41  | 1  | 36  | 36  | 36 | 12,021,728 | Input | no      |                  |                  |                  |              |      |                                |
| GSE25426                                 | human     | THP-1-Control                    | 0.94       | 1.29  | 0.36  | -1 | 36  | 36  | 36 | 21,074,660 | Input | no      |                  |                  |                  |              |      |                                |
| GSE25426                                 | human     | THP-1-PPARg                      | 0.96       | 1.82  | 0.63  | 0  | 36  | 36  | 36 | 14,473,006 | ChIP  | yes     |                  |                  |                  |              |      |                                |
| GSE25426                                 | human     | THP-1-PU.1                       | 0.95       | 4.78  | 2.12  | 2  | 35  | 35  | 35 | 13,571,315 | ChIP  | yes     |                  |                  |                  |              |      |                                |
| GSE25426                                 | human     | THP-1-RXR                        | 0.98       | 1.46  | 0.29  | -1 | 35  | 35  | 35 | 6,999,922  | ChIP  | yes     |                  |                  |                  |              |      |                                |
| Yildirim et al. 2011                     | mouse     | mESC-Brg1-KD-Mbd3                | 0.96       | 2.73  | 0.15  | -2 | 36  | 36  | 36 | 1,656,511  | ChIP  | unknown |                  |                  |                  |              |      |                                |
| Yildirim et al. 2011                     | mouse     | mESC-Mbd3-rep1                   | 0.94       | 2.21  | 0.33  | -1 | 36  | 36  | 36 | 2,189,692  | ChIP  | yes     |                  |                  |                  |              |      |                                |
| Yildirim et al. 2011                     | mouse     | mESC-Mbd3-rep2                   | 0.85       | 1.23  | 0.61  | 0  | 36  | 36  | 36 | 15,055,944 | ChIP  | yes     |                  |                  |                  |              |      |                                |
| Yildirim et al. 2011                     | mouse     | mESC-Tet1-KD-Mbd3                | 0.97       | 1.56  | 0.25  | -1 | 36  | 36  | 36 | 3,626,622  | ChIP  | unknown |                  |                  |                  |              |      |                                |
| Botcheva et al. 2011                     | human     | IMR90-Input                      | 0.87       | 1.27  | 0.21  | -2 | 36  | 36  | 36 | 9,286,134  | Input | no      |                  |                  |                  |              |      |                                |
| Botcheva et al. 2011                     | human     | IMR90-p53                        | 0.7        | 2.66  | 0.61  | 0  | 36  | 36  | 36 | 5,285,892  | ChIP  | yes     |                  |                  |                  |              |      |                                |
| Stadler et al. 2011                      | mouse     | ES-CTCF-rep1                     | 0.64       | 28.28 | 1.67  | 2  | 37  | 37  | 37 | 10,466,451 | ChIP  | yes     |                  |                  |                  |              |      |                                |
| Stadler et al. 2011                      | mouse     | ES-CTCF-rep2                     | 0.44       | 26.16 | 2.87  | 2  | 38  | 38  | 38 | 13,296,384 | ChIP  | yes     |                  |                  |                  |              |      |                                |
| Stadler et al. 2011                      | mouse     | ES-CTCF-rep3                     | 0.49       | 9.15  | 8.28  | 2  | 38  | 38  | 38 | 9,587,128  | ChIP  | yes     |                  |                  |                  |              |      |                                |
| Stadler et al. 2011                      | mouse     | ES-Input-rep1                    | 0.82       | 1.77  | 1.05  | 1  | 38  | 38  | 38 | 11,095,374 | Input | no      |                  |                  |                  |              |      |                                |
| Stadler et al. 2011                      | mouse     | ES-Input-rep2                    | 0.83       | 1.94  | 2.94  | 2  | 38  | 38  | 38 | 29,650,665 | Input | no      |                  |                  |                  |              |      |                                |
| Stadler et al. 2011                      | mouse     | TKO-CTCF-rep1                    | 0.63       | 10.83 | 3.72  | 2  | 36  | 36  | 36 | 34,828,958 | ChIP  | yes     |                  |                  |                  |              |      |                                |
| Stadler et al. 2011                      | mouse     | TKO-CTCF-rep2                    | 0.91       | 5.48  | 3.61  | 2  | 36  | 36  | 36 | 2,836,169  | ChIP  | yes     |                  |                  |                  |              |      |                                |
| Holmstrom et al. 2011                    | mouse     | Pancreas-Input                   | 0.97       | 1.46  | 0.88  | 0  | 36  | 36  | 36 | 11,479,285 | Input | no      |                  |                  |                  |              |      |                                |
| Holmstrom et al. 2011                    | mouse     | Pancreas-Lrh1                    | 0.84       | 4.4   | 1.89  | 2  | 36  | 36  | 36 | 13,587,564 | ChIP  | yes     |                  |                  |                  |              |      |                                |
| Xu et al. 2011                           | zebrafish | Mtx2-4.5hpf                      | 0.77       | 1.7   | 1.39  | 1  | 36  | 36  | 36 | 11,341,093 | ChIP  | yes     |                  |                  |                  |              |      |                                |
| Xu et al. 2011                           | zebrafish | Nanog-like-3.5hpf                | 0.63       | 1.89  | 1.44  | 1  | 36  | 36  | 36 | 7,535,238  | ChIP  | yes     |                  |                  |                  |              |      |                                |
| Xu et al. 2011                           | zebrafish | Nanog-like-4.5hpf                | 0.84       | 3.94  | 1.22  | 1  | 36  | 36  | 36 | 10,103,194 | ChIP  | yes     |                  |                  |                  |              |      |                                |
| Xu et al. 2011                           | zebrafish | WCE-Mtx2-4.5hpf                  | 0.97       | 1.24  | 0.59  | 0  | 36  | 36  | 36 | 18,309,687 | Input | no      |                  |                  |                  |              |      |                                |
| Xu et al. 2011                           | zebrafish | WCE-Nanog-like-3.5hpf            | 0.91       | 1.63  | 0.9   | 0  | 36  | 36  | 36 | 11,252,453 | Input | no      |                  |                  |                  |              |      |                                |
| Xu et al. 2011                           | zebrafish | WCE-Nanog-like-4.5hpf            | 0.98       | 1.36  | 0.67  | 0  | 36  | 36  | 36 | 15,831,173 | Input | no      |                  |                  |                  |              |      |                                |
| Tiwari et al. 2011a; Tiwari et al. 2011b | mouse     | ES-JNK13-biological-replicate-a  | 0.82       | 4.27  | 2.79  | 2  | 38  | 38  | 38 | 8,462,462  | ChIP  | yes     |                  |                  |                  |              |      |                                |
| Tiwari et al. 2011a; Tiwari et al. 2011b | mouse     | ES-JNK13-biological-replicate-b  | 0.51       | 10.19 | 3.89  | 2  | 38  | 38  | 38 | 8,175,875  | ChIP  | yes     |                  |                  |                  |              |      |                                |
| Tiwari et al. 2011a; Tiwari et al. 2011b | mouse     | ES-NFYA-biological-replicate-a   | 0.79       | 2.98  | 5.24  | 2  | 38  | 38  | 38 | 19,929,924 | ChIP  | yes     |                  |                  |                  |              |      |                                |
| Tiwari et al. 2011a; Tiwari et al. 2011b | mouse     | ES-NFYA-biological-replicate-b   | 0.66       | 3.93  | 7.62  | 2  | 38  | 38  | 38 | 24,051,713 | ChIP  | yes     |                  |                  |                  |              |      |                                |
| Tiwari et al. 2011a; Tiwari et al. 2011b | mouse     | Input                            | 0.82       | 1.77  | 1.05  | 1  | 38  | 38  | 38 | 11,095,374 | Input | no      |                  |                  |                  |              |      |                                |
| Tiwari et al. 2011a; Tiwari et al. 2011b | mouse     | NP-JNK13-biological-replicate-a  | 0.69       | 8.11  | 5.07  | 2  | 38  | 38  | 38 | 8,802,240  | ChIP  | yes     |                  |                  |                  |              |      |                                |
| Tiwari et al. 2011a; Tiwari et al. 2011b | mouse     | NP-JNK13-biological-replicate-b  | 0.92       | 2.07  | 1.37  | 1  | 38  | 38  | 38 | 9,691,977  | ChIP  | yes     |                  |                  |                  |              |      |                                |
| Tiwari et al. 2011a; Tiwari et al. 2011b | mouse     | NP-NFYA-biological-replicate-a   | 0.85       | 2.18  | 3.96  | 2  | 38  | 38  | 38 | 23,674,653 | ChIP  | yes     |                  |                  |                  |              |      |                                |
| Tiwari et al. 2011a; Tiwari et al. 2011b | mouse     | NP-NFYA-biological-replicate-b   | 0.86       | 1.97  | 3.33  | 2  | 38  | 38  | 38 | 21,717,487 | ChIP  | yes     |                  |                  |                  |              |      |                                |
| Tiwari et al. 2011a; Tiwari et al. 2011b | mouse     | TN-DMSO-JNK1-3                   | 0.17       | 11.6  | 12.92 | 2  | 36  | 36  | 36 | 38,425,945 | ChIP  | yes     |                  |                  |                  |              |      |                                |
| Tiwari et al. 2011a; Tiwari et al. 2011b | mouse     | TN-JNK1-3-biological-replicate-a | 0.35       | 17.31 | 5.6   | 2  | 38  | 38  | 38 | 8,678,605  | ChIP  | yes     |                  |                  |                  |              |      |                                |

Continued on next page

Table S1 – Continued from previous page

| Source                                   | Species | Library                          | Complexity | NSC   | RSC   | QC | Ave. Read Length | Max. Read Length | Min. Read Length | Mapped reads | Type  | Should exhibit read clustering |
|------------------------------------------|---------|----------------------------------|------------|-------|-------|----|------------------|------------------|------------------|--------------|-------|--------------------------------|
| Tiwari et al. 2011a; Tiwari et al. 2011b | mouse   | TN-JNK1-3-biological-replicate-b | 0.29       | 20.52 | 7.67  | 2  | 38               | 38               | 38               | 6,897,900    | ChIP  | yes                            |
| Tiwari et al. 2011a; Tiwari et al. 2011b | mouse   | TN-JNKi-JNK1-3                   | 0.35       | 5.86  | 12.97 | 2  | 36               | 36               | 36               | 42,637,275   | ChIP  | yes                            |
| Tiwari et al. 2011a; Tiwari et al. 2011b | mouse   | TN-NFYA-biological-replicate-a   | 0.68       | 3.06  | 5.64  | 2  | 38               | 38               | 38               | 27,386,709   | ChIP  | yes                            |
| Tiwari et al. 2011a; Tiwari et al. 2011b | mouse   | TN-NFYA-biological-replicate-b   | 0.84       | 2.15  | 3.33  | 2  | 38               | 38               | 38               | 25,748,779   | ChIP  | yes                            |
| Zhang et al. 2011                        | mouse   | F-Bcl6-rep1-G51                  | 0.91       | 2.05  | 1.74  | 2  | 36               | 36               | 36               | 7,810,319    | ChIP  | yes                            |
| Zhang et al. 2011                        | mouse   | F-Bcl6-rep2-G65-M1               | 0.9        | 6.17  | 0.58  | 0  | 36               | 36               | 36               | 6,073,003    | ChIP  | yes                            |
| Zhang et al. 2011                        | mouse   | F-Bcl6-rep3-G65-M2               | 0.75       | 2.83  | 1.16  | 1  | 36               | 36               | 36               | 6,266,286    | ChIP  | yes                            |
| Zhang et al. 2011                        | mouse   | F-Bcl6-rep4-G65-M3               | 0.93       | 3.23  | 0.42  | -1 | 36               | 36               | 36               | 12,764,985   | ChIP  | yes                            |
| Zhang et al. 2011                        | mouse   | FH-STAT5-rep1-G66-M1             | 0.83       | 6.19  | 3.78  | 2  | 36               | 36               | 36               | 6,691,463    | ChIP  | yes                            |
| Zhang et al. 2011                        | mouse   | FH-STAT5-rep2-G66-M2             | 0.69       | 5.59  | 2.97  | 2  | 36               | 36               | 36               | 6,110,031    | ChIP  | yes                            |
| Zhang et al. 2011                        | mouse   | FH-STAT5-rep3-G66-M3             | 0.65       | 9.48  | 4.33  | 2  | 36               | 36               | 36               | 13,444,170   | ChIP  | yes                            |
| Zhang et al. 2011                        | mouse   | FL-STAT5-rep1-G52                | 0.19       | 2.48  | 1.94  | 2  | 36               | 36               | 36               | 5,389,553    | ChIP  | yes                            |
| Zhang et al. 2011                        | mouse   | FL-STAT5-rep2-G70-M3             | 0.52       | 3.27  | 1.47  | 1  | 36               | 36               | 36               | 5,884,969    | ChIP  | yes                            |
| Zhang et al. 2011                        | mouse   | FL-STAT5-rep3-G72-M1             | 0.63       | 2.55  | 0.92  | 0  | 36               | 36               | 36               | 2,627,103    | ChIP  | yes                            |
| Zhang et al. 2011                        | mouse   | IgG-control                      | 0.62       | 1.66  | 0.81  | 0  | 35               | 35               | 35               | 11,562,651   | IgG   | no                             |
| Zhang et al. 2011                        | mouse   | M-Bcl6-rep1-G49                  | 0.49       | 3.13  | 1.72  | 2  | 35               | 35               | 35               | 18,985,967   | ChIP  | yes                            |
| Zhang et al. 2011                        | mouse   | M-Bcl6-rep2-G50                  | 0.8        | 2.86  | 2.36  | 2  | 35               | 35               | 35               | 14,452,480   | ChIP  | yes                            |
| Zhang et al. 2011                        | mouse   | M-Bcl6-rep3-G71-M2               | 0.76       | 2.33  | 0.74  | 0  | 35               | 35               | 35               | 14,149,114   | ChIP  | yes                            |
| Zhang et al. 2011                        | mouse   | MH-STAT5-rep1-G36                | 0.62       | 4.29  | 2.69  | 2  | 35               | 35               | 35               | 15,997,841   | ChIP  | yes                            |
| Zhang et al. 2011                        | mouse   | MH-STAT5-rep2-G41                | 0.76       | 3.64  | 2.47  | 2  | 35               | 35               | 35               | 12,841,332   | ChIP  | yes                            |
| Zhang et al. 2011                        | mouse   | MH-STAT5-rep3-G42                | 0.64       | 3.39  | 2.67  | 2  | 36               | 36               | 36               | 9,528,779    | ChIP  | yes                            |
| Zhang et al. 2011                        | mouse   | ML-STAT5-rep1-G35                | 0.71       | 2.18  | 2.17  | 2  | 36               | 36               | 36               | 16,024,096   | ChIP  | yes                            |
| Zhang et al. 2011                        | mouse   | ML-STAT5-rep2-G40                | 0.84       | 1.69  | 1.42  | 1  | 36               | 36               | 36               | 5,688,929    | ChIP  | yes                            |
| Smith et al. 2011                        | mouse   | mES-ELL                          | 0.79       | 1.71  | 0.79  | 0  | 40               | 40               | 40               | 16,754,758   | ChIP  | yes                            |
| Smith et al. 2011                        | mouse   | mES-Input                        | 0.96       | 1.38  | 0.76  | 0  | 40               | 40               | 40               | 19,454,353   | Input | no                             |
| Nakayamada et al. 2011                   | mouse   | CD4+-Tbet                        | 0.56       | 3.09  | 1.78  | 2  | 36               | 36               | 36               | 23,421,318   | ChIP  | yes                            |
| Lu et al. 2012                           | human   | IgG-1-BCBL1                      | 0.94       | 2.23  | 1.07  | 1  | 36               | 36               | 36               | 19,209,840   | IgG   | no                             |
| Lu et al. 2012                           | human   | IgG-2-BCBL1                      | 0.81       | 1.44  | 0.3   | -1 | 36               | 36               | 36               | 12,604,075   | IgG   | no                             |
| Lu et al. 2012                           | human   | LANA-1-BCBL1                     | 0.46       | 1.6   | 0.53  | 0  | 36               | 36               | 36               | 19,777,228   | ChIP  | yes                            |
| Lu et al. 2012                           | human   | LANA-2-BCBL1                     | 0.86       | 1.44  | 0.27  | -1 | 36               | 36               | 36               | 11,880,205   | ChIP  | yes                            |
| Meyer et al. 2012                        | human   | LS180-bCat-125-1                 | 0.43       | 13.11 | 1.87  | 2  | 35.43            | 36               | 35               | 39,712,224   | ChIP  | yes                            |
| Meyer et al. 2012                        | human   | LS180-bCat-Veh-1                 | 0.43       | 6.85  | 2.83  | 2  | 35.1             | 36               | 35               | 25,024,509   | ChIP  | yes                            |
| Meyer et al. 2012                        | human   | LS180-CDX2-125-1                 | 0.57       | 4.36  | 1.81  | 2  | 35.59            | 36               | 35               | 38,267,118   | ChIP  | yes                            |
| Meyer et al. 2012                        | human   | LS180-CDX2-Veh-1                 | 0.56       | 4.57  | 1.71  | 2  | 35.6             | 36               | 35               | 34,581,066   | ChIP  | yes                            |
| Meyer et al. 2012                        | human   | LS180-CEBPb-125-1                | 0.81       | 8.48  | 1.8   | 2  | 35               | 35               | 35               | 24,978,947   | ChIP  | yes                            |
| Meyer et al. 2012                        | human   | LS180-CEBPb-Veh-1                | 0.05       | 8.15  | 1.82  | 2  | 35.75            | 36               | 35               | 78,542,681   | ChIP  | yes                            |
| Meyer et al. 2012                        | human   | LS180-Input-1                    | 0.15       | 1.83  | 1.02  | 1  | 35.66            | 36               | 35               | 54,134,263   | Input | no                             |
| Meyer et al. 2012                        | human   | LS180-RXR-125-1                  | 0.09       | 7.72  | 1.64  | 2  | 36               | 36               | 36               | 29,948,896   | ChIP  | yes                            |
| Meyer et al. 2012                        | human   | LS180-RXR-Veh-1                  | 0.1        | 7.3   | 1.79  | 2  | 36               | 36               | 36               | 26,448,441   | ChIP  | yes                            |
| Meyer et al. 2012                        | human   | LS180-TCF4-125-2                 | 0.28       | 10.15 | 1.78  | 2  | 45.01            | 50               | 35               | 49,453,419   | ChIP  | yes                            |
| Meyer et al. 2012                        | human   | LS180-TCF4-Veh-2                 | 0.36       | 10.26 | 1.9   | 2  | 42.43            | 50               | 35               | 20,780,670   | ChIP  | yes                            |
| Meyer et al. 2012                        | human   | LS180-VDR-125-1                  | 0.23       | 5.74  | 3.37  | 2  | 36               | 36               | 36               | 4,734,750    | ChIP  | yes                            |
| Meyer et al. 2012                        | human   | LS180-VDR-Veh-1                  | 0.18       | 11.61 | 5.58  | 2  | 35.79            | 36               | 35               | 72,061,937   | ChIP  | unknown                        |
| Ntziachristos et al. 2012                | mouse   | DP-mnase-input-replicate-1       | 0.92       | 2.74  | 1.13  | 1  | 34               | 34               | 34               | 15,457,880   | Input | no                             |
| Ntziachristos et al. 2012                | mouse   | DP-mnase-input-replicate-2       | 0.9        | 6.08  | 3.06  | 2  | 34               | 34               | 34               | 12,676,911   | Input | no                             |
| Ntziachristos et al. 2012                | mouse   | T-ALL-mnase-input-replicate-1    | 0.58       | 1.7   | 0.18  | -2 | 34               | 34               | 34               | 9,970,383    | Input | no                             |
| Ntziachristos et al. 2012                | mouse   | T-ALL-mnase-input-replicate-2    | 0.86       | 2.17  | 0.68  | 0  | 34               | 34               | 34               | 12,351,316   | Input | no                             |
| Ntziachristos et al. 2012                | mouse   | T-ALL-Notch1                     | 0.75       | 2.23  | 1.97  | 2  | 34               | 34               | 34               | 15,248,670   | ChIP  | yes                            |
| Ntziachristos et al. 2012                | mouse   | T-ALL-sonicated-input            | 0.7        | 1.28  | 0.17  | -2 | 34               | 34               | 34               | 12,479,110   | Input | no                             |
| Cheng et al. 2012                        | human   | Gdown1-Control                   | 0.97       | 1.69  | 0.66  | 0  | 36               | 36               | 36               | 3,798,010    | ChIP  | yes                            |
| Cheng et al. 2012                        | human   | Gdown1-Flavo                     | 0.93       | 1.77  | 0.74  | 0  | 36               | 36               | 36               | 7,869,560    | ChIP  | yes                            |
| GSE33128                                 | human   | Gdown1-IMR90                     | 0.67       | 2.83  | 1.46  | 1  | 36               | 36               | 36               | 13,781,340   | ChIP  | yes                            |
| GSE33128                                 | human   | IgG-IMR90                        | 0.67       | 7.4   | 2.05  | 2  | 36               | 36               | 36               | 7,308,478    | IgG   | no                             |
| GSE33128                                 | human   | Input-IMR90                      | 0.96       | 1.47  | 0.69  | 0  | 36               | 36               | 36               | 14,239,395   | Input | no                             |
| GSE35109                                 | human   | ERa-ChIP-seq-1                   | 0.86       | 1.46  | 1.99  | 2  | 51               | 51               | 51               | 48,891,564   | ChIP  | yes                            |
| GSE35109                                 | human   | ERa-ChIP-seq-2                   | 0.7        | 2.02  | 3.17  | 2  | 51               | 51               | 51               | 52,808,583   | ChIP  | yes                            |
| GSE35109                                 | human   | ERa-ChIP-seq-3                   | 0.3        | 5.75  | 5.72  | 2  | 51               | 51               | 51               | 46,155,863   | ChIP  | yes                            |
| GSE35109                                 | human   | ERa-ChIP-seq-4                   | 0.8        | 1.64  | 2.76  | 2  | 51               | 51               | 51               | 57,965,746   | ChIP  | yes                            |
| Canella et al. 2012                      | mouse   | INPUT-Rep1                       | 0.8        | 1.37  | 1.93  | 2  | 75               | 75               | 75               | 31,537,710   | Input | no                             |
| Canella et al. 2012                      | mouse   | INPUT-Rep2                       | 0.8        | 1.38  | 1.96  | 2  | 75               | 75               | 75               | 33,328,402   | Input | no                             |
| Canella et al. 2012                      | mouse   | RPB2-Rep1                        | 0.8        | 1.55  | 1.74  | 2  | 75               | 75               | 75               | 35,847,372   | ChIP  | yes                            |
| Canella et al. 2012                      | mouse   | RPB2-Rep2                        | 0.83       | 1.94  | 1.75  | 2  | 75               | 75               | 75               | 30,551,646   | ChIP  | yes                            |
| Canella et al. 2012                      | mouse   | RPC1-Rep1                        | 0.9        | 1.9   | 1.48  | 1  | 75               | 75               | 75               | 23,033,105   | ChIP  | yes                            |
| Canella et al. 2012                      | mouse   | RPC1-Rep2                        | 0.91       | 1.72  | 1.31  | 1  | 75               | 75               | 75               | 22,145,329   | ChIP  | yes                            |
| Canella et al. 2012                      | mouse   | RPC4-Rep1                        | 0.87       | 1.9   | 1.49  | 1  | 75               | 75               | 75               | 25,973,018   | ChIP  | yes                            |
| Canella et al. 2012                      | mouse   | RPC4-Rep2                        | 0.86       | 1.83  | 1.6   | 2  | 75               | 75               | 75               | 31,517,301   | ChIP  | yes                            |
| Sadasivam et al. 2012                    | human   | BMyb-HeLa-Rep1                   | 0.88       | 1.36  | 0.32  | -1 | 36               | 36               | 36               | 15,389,344   | ChIP  | yes                            |

Continued on next page

Table S1 – Continued from previous page

| Source                | Species | Library                                | Complexity | NSC  | RSC   | QC | Ave. Read Length | Max. Read Length | Min. Read Length | Mapped reads | Type  | Should exhibit read clustering |
|-----------------------|---------|----------------------------------------|------------|------|-------|----|------------------|------------------|------------------|--------------|-------|--------------------------------|
| Sadasivam et al. 2012 | human   | BMyb-HeLa-Rep2                         | 0.77       | 1.81 | 0.07  | -2 | 36               | 36               | 36               | 1,052,761    | ChIP  | yes                            |
| Sadasivam et al. 2012 | human   | Input-HeLa-Rep1                        | 0.71       | 1.79 | 0.69  | 0  | 36               | 36               | 36               | 17,569,472   | Input | no                             |
| Sadasivam et al. 2012 | human   | Input-HeLa-Rep2                        | 0.64       | 1.56 | 0.08  | -2 | 36               | 36               | 36               | 1,586,928    | Input | no                             |
| Sadasivam et al. 2012 | human   | LIN9-HeLa-Rep1                         | 0.92       | 1.39 | 0.49  | -1 | 36               | 36               | 36               | 17,000,309   | ChIP  | yes                            |
| Sadasivam et al. 2012 | human   | LIN9-HeLa-Rep2                         | 0.88       | 1.41 | 0.05  | -2 | 36               | 36               | 36               | 1,798,161    | ChIP  | yes                            |
| Boergesen et al. 2012 | mouse   | LXR-WT-Bexarotene                      | 0.93       | 1.94 | 2.05  | 2  | 35               | 35               | 35               | 6,469,307    | ChIP  | yes                            |
| Boergesen et al. 2012 | mouse   | LXR-WT-Control                         | 0.9        | 1.91 | 1.45  | 1  | 35               | 35               | 35               | 6,086,575    | ChIP  | unknown                        |
| Boergesen et al. 2012 | mouse   | LXR-WT-T0901317                        | 0.93       | 2.21 | 3.81  | 2  | 35               | 35               | 35               | 6,773,502    | ChIP  | unknown                        |
| Boergesen et al. 2012 | mouse   | PPARalpha-LXRdKO-Control               | 0.69       | 4.14 | 4.68  | 2  | 35               | 35               | 35               | 12,603,632   | ChIP  | yes                            |
| Boergesen et al. 2012 | mouse   | PPARalpha-WT-Control                   | 0.66       | 4.02 | 10.05 | 2  | 35               | 35               | 35               | 13,493,293   | ChIP  | yes                            |
| Boergesen et al. 2012 | mouse   | RXR-LXRdKO-Bexarotene                  | 0.96       | 2.71 | 2     | 2  | 34               | 34               | 34               | 4,499,835    | ChIP  | yes                            |
| Boergesen et al. 2012 | mouse   | RXR-LXRdKO-Control                     | 0.92       | 2.7  | 1.99  | 2  | 32               | 32               | 32               | 5,011,146    | ChIP  | yes                            |
| Boergesen et al. 2012 | mouse   | RXR-LXRdKO-T0901317                    | 0.94       | 2.14 | 1.9   | 2  | 32               | 32               | 32               | 5,048,268    | ChIP  | unknown                        |
| Boergesen et al. 2012 | mouse   | RXR-WT-Bexarotene                      | 0.94       | 2.57 | 1.82  | 2  | 34               | 34               | 34               | 4,819,549    | ChIP  | yes                            |
| Boergesen et al. 2012 | mouse   | RXR-WT-Control                         | 0.95       | 1.96 | 1.33  | 1  | 32               | 32               | 32               | 5,847,078    | ChIP  | yes                            |
| Boergesen et al. 2012 | mouse   | RXR-WT-T0901317                        | 0.93       | 3.08 | 2.13  | 2  | 32               | 32               | 32               | 5,510,973    | ChIP  | unknown                        |
| Schödel et al. 2012   | human   | HIF-1beta                              | 0.37       | 3.41 | 1.44  | 1  | 51               | 51               | 51               | 7,729,167    | ChIP  | yes                            |
| Schödel et al. 2012   | human   | HIF-2alpha                             | 0.64       | 3.11 | 1.21  | 1  | 51               | 51               | 51               | 1,885,345    | ChIP  | yes                            |
| Schödel et al. 2012   | human   | Pre-immune-control                     | 0.29       | 4.94 | 1.87  | 2  | 51               | 51               | 51               | 5,806,061    | IgG   | no                             |
| Pehkonen et al. 2012  | human   | IgG-control                            | 0.72       | 1.41 | 0.24  | -2 | 36               | 36               | 36               | 15,281,888   | IgG   | no                             |
| Pehkonen et al. 2012  | human   | LXR-T09                                | 0.87       | 1.47 | 0.29  | -1 | 36               | 36               | 36               | 14,265,491   | ChIP  | yes                            |
| Pehkonen et al. 2012  | human   | LXR-vehicle                            | 0.9        | 1.42 | 0.27  | -1 | 36               | 36               | 36               | 14,289,777   | ChIP  | unknown                        |
| GSE30919              | mouse   | CapH2-Ab1-DMSO-NOT-NORMALIZED-mES-MM8  | 0.69       | 1.61 | 0.91  | 0  | 36               | 36               | 36               | 16,534,945   | ChIP  | yes                            |
| GSE30919              | mouse   | CapH2-Ab1-FLAVO-NOT-NORMALIZED-mES-MM8 | 0.71       | 1.61 | 0.83  | 0  | 36               | 36               | 36               | 15,830,789   | ChIP  | yes                            |
| GSE30919              | mouse   | CapH2-Ab1-WT-mES-MM8                   | 0.66       | 1.73 | 0.92  | 0  | 36               | 36               | 36               | 16,607,056   | ChIP  | yes                            |
| GSE30919              | mouse   | CapH2-Ab2-WT-mES-MM8                   | 0.9        | 1.41 | 0.78  | 0  | 36               | 36               | 36               | 17,717,075   | ChIP  | yes                            |
| GSE30919              | mouse   | Smc1-DMSO-NOT-NORMALIZED-mES-MM8       | 0.84       | 5.22 | 1.99  | 2  | 36               | 36               | 36               | 19,206,320   | ChIP  | yes                            |
| GSE30919              | mouse   | Smc1-FLAVO-NOT-NORMALIZED-mES-MM8      | 0.78       | 4.43 | 1.88  | 2  | 36               | 36               | 36               | 19,650,774   | ChIP  | yes                            |
| Gao et al. 2012       | human   | CBX2                                   | 0.83       | 1.51 | 0.52  | 0  | 46               | 46               | 46               | 11,796,622   | ChIP  | yes                            |
| Gao et al. 2012       | human   | FH-CBX2.HA                             | 0.89       | 1.22 | 0.37  | -1 | 36               | 36               | 36               | 20,303,587   | ChIP  | yes                            |
| Gao et al. 2012       | human   | FH-PCGF1.HA                            | 0.82       | 1.35 | 0.35  | -1 | 36               | 36               | 36               | 18,667,442   | ChIP  | yes                            |
| Gao et al. 2012       | human   | FH-PCGF2.HA                            | 0.66       | 1.9  | 0.67  | 0  | 36               | 36               | 36               | 18,549,373   | ChIP  | yes                            |
| Gao et al. 2012       | human   | FH-PCGF4.HA                            | 0.31       | 2.44 | 0.81  | 0  | 36               | 36               | 36               | 18,274,491   | ChIP  | yes                            |
| Gao et al. 2012       | human   | FH-PCGF5.HA                            | 0.66       | 1.78 | 0.65  | 0  | 36               | 36               | 36               | 18,930,930   | ChIP  | yes                            |
| Gao et al. 2012       | human   | FH-PCGF6.HA                            | 0.8        | 1.48 | 0.43  | -1 | 36               | 36               | 36               | 19,548,786   | ChIP  | yes                            |
| Gao et al. 2012       | human   | FH-RING1B.HA                           | 0.43       | 1.94 | 1.58  | 2  | 36               | 36               | 36               | 19,398,688   | ChIP  | yes                            |
| Gao et al. 2012       | human   | FH-RYBP.HA                             | 0.83       | 1.32 | 0.36  | -1 | 36               | 36               | 36               | 16,950,286   | ChIP  | yes                            |
| Gao et al. 2012       | human   | input                                  | 0.78       | 1.23 | 0.22  | -2 | 36               | 36               | 36               | 19,426,459   | Input | no                             |
| Gao et al. 2012       | human   | PCGF4                                  | 0.93       | 1.16 | 0.19  | -2 | 46               | 46               | 46               | 14,654,954   | ChIP  | yes                            |
| Gao et al. 2012       | human   | RING1B                                 | 0.9        | 1.18 | 0.24  | -2 | 46               | 46               | 46               | 19,431,342   | ChIP  | yes                            |
| Gao et al. 2012       | human   | RYBP                                   | 0.91       | 1.36 | 0.44  | -1 | 46               | 46               | 46               | 15,442,467   | ChIP  | yes                            |
| Yu et al. 2012        | mouse   | CBFb-induced-1                         | 0.62       | 1.62 | 2.88  | 2  | 39.24            | 40               | 36               | 58,627,013   | ChIP  | yes                            |
| Yu et al. 2012        | mouse   | CBFb-thymocyte-control                 | 0.25       | 1.63 | 0.62  | 0  | 40               | 40               | 40               | 8,637,405    | ChIP  | yes                            |
| Yu et al. 2012        | mouse   | CBFb-thymocyte-Runx1KO                 | 0.35       | 1.4  | 0.54  | 0  | 40               | 40               | 40               | 7,518,656    | ChIP  | yes                            |
| Yu et al. 2012        | mouse   | CBFb-uninduced-1                       | 0.73       | 1.58 | 2.28  | 2  | 36               | 36               | 36               | 26,748,905   | ChIP  | yes                            |
| Yu et al. 2012        | mouse   | IgG-induced-1                          | 0.13       | 4.73 | 3.85  | 2  | 39.39            | 40               | 36               | 60,744,963   | IgG   | no                             |
| Yu et al. 2012        | mouse   | IgG-thymocyte-control                  | 0.11       | 7.03 | 0.93  | 0  | 40               | 40               | 40               | 10,387,710   | IgG   | no                             |
| Yu et al. 2012        | mouse   | IgG-thymocyte-Runx1KO                  | 0.04       | 9.33 | 0.8   | 0  | 40               | 40               | 40               | 11,696,369   | IgG   | no                             |
| Yu et al. 2012        | mouse   | IgG-uninduced-1                        | 0.14       | 3.57 | 1.51  | 2  | 36               | 36               | 36               | 30,535,688   | IgG   | no                             |
| Yu et al. 2012        | mouse   | Ring1b-alt-ab                          | 0.11       | 8.57 | 1.74  | 2  | 40               | 40               | 40               | 17,104,492   | ChIP  | yes                            |
| Yu et al. 2012        | mouse   | Ring1b-induced-1                       | 0.67       | 1.5  | 2.59  | 2  | 39.31            | 40               | 36               | 65,911,236   | ChIP  | yes                            |
| Yu et al. 2012        | mouse   | Ring1b-thymocyte-control               | 0.21       | 3.38 | 0.58  | 0  | 40               | 40               | 40               | 7,476,406    | ChIP  | yes                            |
| Yu et al. 2012        | mouse   | Ring1b-thymocyte-Runx1KO               | 0.1        | 8.31 | 1.1   | 1  | 40               | 40               | 40               | 11,067,615   | ChIP  | yes                            |
| Yu et al. 2012        | mouse   | Ring1b-uninduced-1                     | 0.38       | 2.1  | 3.58  | 2  | 36               | 36               | 36               | 31,481,625   | ChIP  | yes                            |
| Yu et al. 2012        | mouse   | Runx1-for-Ring1b-alt-ab                | 0.2        | 6.16 | 2.13  | 2  | 40               | 40               | 40               | 14,979,699   | ChIP  | yes                            |
| Yu et al. 2012        | mouse   | Runx1-induced-1                        | 0.45       | 1.72 | 3.1   | 2  | 39.26            | 40               | 36               | 65,873,746   | ChIP  | yes                            |
| Yu et al. 2012        | mouse   | Runx1-thymocyte-control                | 0.24       | 5.51 | 1.23  | 1  | 40               | 40               | 40               | 8,075,699    | ChIP  | yes                            |
| Yu et al. 2012        | mouse   | Runx1-thymocyte-Runx1KO                | 0.17       | 4.65 | 0.84  | 0  | 40               | 40               | 40               | 9,234,112    | ChIP  | no                             |
| Yu et al. 2012        | mouse   | Runx1-uninduced-1                      | 0.65       | 1.55 | 1.73  | 2  | 36               | 36               | 36               | 23,915,032   | ChIP  | yes                            |
| GSE29180              | human   | Jurkat-GATA3                           | 0.75       | 4.85 | 0.85  | 0  | 36               | 36               | 36               | 4,308,315    | ChIP  | yes                            |
| GSE29180              | human   | Jurkat-Input-Rep1                      | 0.97       | 1.19 | 0.42  | -1 | 36               | 36               | 36               | 12,308,677   | Input | no                             |
| GSE29180              | human   | Jurkat-RUNX1-Rep1                      | 0.61       | 2.83 | 0.82  | 0  | 36               | 36               | 36               | 5,791,954    | ChIP  | yes                            |
| GSE29180              | human   | Jurkat-RUNX1-Rep2                      | 0.53       | 2.44 | 0.53  | 0  | 36               | 36               | 36               | 5,800,696    | ChIP  | yes                            |
| GSE29180              | human   | Jurkat-RUNX1-Rep3                      | 0.44       | 4.33 | 0.89  | 0  | 36               | 36               | 36               | 3,795,121    | ChIP  | yes                            |
| GSE29180              | human   | Jurkat-TAL1-Rep1                       | 0.92       | 1.62 | 0.38  | -1 | 36               | 36               | 36               | 5,485,444    | ChIP  | yes                            |
| GSE29180              | human   | Jurkat-TAL1-Rep2                       | 0.86       | 2.59 | 0.68  | 0  | 36               | 36               | 36               | 6,350,195    | ChIP  | yes                            |
| GSE29180              | human   | Jurkat-TCF12                           | 0.81       | 1.53 | 0.38  | -1 | 36               | 36               | 36               | 8,594,457    | ChIP  | yes                            |

Continued on next page



Table S1 – Continued from previous page

| Source                              | Species | Library                     | Complexity | NSC   | RSC  | QC | Ave. Read Length | Max. Read Length | Min. Read Length | Mapped reads | Type  | Should exhibit read clustering |
|-------------------------------------|---------|-----------------------------|------------|-------|------|----|------------------|------------------|------------------|--------------|-------|--------------------------------|
| GSE29180                            | human   | Jurkat-TCF3                 | 0.84       | 1.51  | 0.24 | -2 | 36               | 36               | 36               | 5,398,758    | ChIP  | yes                            |
| Sakabe et al. 2012                  | mouse   | input-1                     | 0.95       | 1.86  | 0.47 | -1 | 36               | 36               | 36               | 6,264,090    | Input | no                             |
| Sakabe et al. 2012                  | mouse   | input-2                     | 0.94       | 1.38  | 0.41 | -1 | 36               | 36               | 36               | 10,837,874   | Input | no                             |
| Sakabe et al. 2012                  | mouse   | input-3                     | 0.95       | 1.21  | 0.48 | -1 | 36               | 36               | 36               | 23,754,878   | Input | no                             |
| Sakabe et al. 2012                  | mouse   | Tbx20-GFP                   | 0.87       | 1.9   | 0.63 | 0  | 36               | 36               | 36               | 5,928,909    | ChIP  | yes                            |
| Miller et al. 2012                  | human   | HCC-1428-LTED-ER            | 0.92       | 1.2   | 0.36 | -1 | 43               | 43               | 43               | 23,589,680   | ChIP  | yes                            |
| Miller et al. 2012                  | human   | MCF-7-LTED-ER               | 0.93       | 1.15  | 0.55 | 0  | 43               | 43               | 43               | 27,118,853   | ChIP  | yes                            |
| Hutchins et al. 2012                | mouse   | PEC-IL10-treated-Input      | 0.97       | 1.39  | 0.25 | -1 | 49               | 49               | 49               | 4,244,316    | Input | no                             |
| Hutchins et al. 2012                | mouse   | PEC-IL10-treated-STAT3      | 0.71       | 5.06  | 1.09 | 1  | 49               | 49               | 49               | 3,841,121    | ChIP  | yes                            |
| Hutchins et al. 2012                | mouse   | PEC-Untreated-Input         | 0.97       | 1.39  | 0.17 | -2 | 49               | 49               | 49               | 4,321,159    | Input | no                             |
| Hutchins et al. 2012                | mouse   | PEC-Untreated-STAT3         | 0.83       | 3.12  | 0.73 | 0  | 49               | 49               | 49               | 4,189,247    | ChIP  | unknown                        |
| Trowbridge et al. 2012              | mouse   | MLL1                        | 0.96       | 1.44  | 0.35 | -1 | 36               | 36               | 36               | 4,933,023    | ChIP  | yes                            |
| Xiao et al. 2012                    | mouse   | E14-IgG                     | 0.58       | 2.13  | 0.42 | -1 | 100              | 100              | 100              | 3,823,799    | IgG   | no                             |
| Xiao et al. 2012                    | mouse   | E14-TAF1                    | 0.95       | 1.07  | 0.37 | -1 | 75               | 75               | 75               | 22,675,646   | ChIP  | yes                            |
| Xiao et al. 2012                    | pig     | piPSC-IgG                   | 0.62       | 2.33  | 0.45 | -1 | 75               | 75               | 75               | 3,237,532    | IgG   | no                             |
| Xiao et al. 2012                    | pig     | piPSC-NANOG                 | 0.79       | 1.06  | 0.2  | -2 | 75               | 75               | 75               | 15,130,135   | ChIP  | yes                            |
| Xiao et al. 2012                    | pig     | piPSC-OCT4                  | 0.84       | 1.58  | 0.63 | 0  | 75               | 75               | 75               | 4,150,813    | ChIP  | yes                            |
| Xiao et al. 2012                    | pig     | piPSC-p300                  | 0.86       | 1.07  | 0.16 | -2 | 75               | 75               | 75               | 27,328,401   | ChIP  | yes                            |
| Xiao et al. 2012                    | pig     | piPSC-TAF1                  | 0.76       | 1.06  | 0.23 | -2 | 75               | 75               | 75               | 8,822,964    | ChIP  | yes                            |
| Doré et al. 2012; Chlon et al. 2012 | mouse   | G1ME-ETS1                   | 0.91       | 1.37  | 1.33 | 1  | 36               | 36               | 36               | 31,187,821   | ChIP  | yes                            |
| Doré et al. 2012; Chlon et al. 2012 | mouse   | G1ME-GATA1                  | 0.52       | 1.77  | 2.14 | 2  | 36               | 36               | 36               | 35,032,324   | ChIP  | yes                            |
| Doré et al. 2012; Chlon et al. 2012 | mouse   | G1ME-GATA2                  | 0.96       | 1.8   | 1.22 | 1  | 36               | 36               | 36               | 10,496,766   | ChIP  | yes                            |
| Doré et al. 2012; Chlon et al. 2012 | mouse   | G1ME-INPUT-GAII             | 0.93       | 1.23  | 0.19 | -2 | 36               | 36               | 36               | 10,209,628   | Input | no                             |
| Doré et al. 2012; Chlon et al. 2012 | mouse   | G1ME-INPUT-GAIIx            | 0.63       | 1.42  | 1.59 | 2  | 36               | 36               | 36               | 20,517,340   | Input | no                             |
| Li et al. 2012                      | mouse   | Input-seq-Adr8h             | 0.86       | 1.98  | 1.75 | 2  | 35               | 35               | 35               | 22,456,496   | Input | no                             |
| Li et al. 2012                      | mouse   | Input-seq-untreated         | 0.68       | 3.73  | 4.81 | 2  | 35               | 35               | 35               | 24,631,682   | Input | no                             |
| Li et al. 2012                      | mouse   | p53-Adr8h                   | 0.74       | 8.66  | 2.17 | 2  | 35               | 35               | 35               | 22,316,127   | ChIP  | yes                            |
| Li et al. 2012                      | mouse   | p53-untreated               | 0.95       | 5.29  | 1.57 | 2  | 35               | 35               | 35               | 9,544,532    | ChIP  | unknown                        |
| Li et al. 2012                      | mouse   | p53S18P-Adr8h               | 0.92       | 14.22 | 1.65 | 2  | 35               | 35               | 35               | 9,487,356    | ChIP  | yes                            |
| Li et al. 2012                      | mouse   | p53S18P-untreated           | 0.91       | 2.65  | 1.59 | 2  | 35               | 35               | 35               | 15,417,989   | ChIP  | unknown                        |
| Bugge et al. 2012; Feng et al. 2012 | mouse   | Reverb-alpha-null-5pm       | 0.63       | 1.91  | 1.73 | 2  | 50               | 50               | 50               | 82,551,235   | ChIP  | yes                            |
| Bugge et al. 2012; Feng et al. 2012 | mouse   | Reverb-beta-5am             | 0.83       | 1.7   | 0.73 | 0  | 36               | 36               | 36               | 7,098,042    | ChIP  | unknown                        |
| Bugge et al. 2012; Feng et al. 2012 | mouse   | Reverb-beta-5pm             | 0.18       | 2.08  | 1.77 | 2  | 36               | 36               | 36               | 39,165,327   | ChIP  | unknown                        |
| Gowher et al. 2012                  | human   | HA-flag-Vezf1-Rep1          | 0.91       | 1.22  | 0.5  | 0  | 36               | 36               | 36               | 41,807,364   | ChIP  | yes                            |
| Gowher et al. 2012                  | human   | HA-flag-Vezf1-Rep2          | 0.94       | 1.22  | 0.38 | -1 | 36               | 36               | 36               | 10,730,653   | ChIP  | yes                            |
| Gowher et al. 2012                  | human   | Input-HELA-Rep1             | 0.91       | 1.34  | 0.96 | 0  | 36               | 36               | 36               | 39,886,595   | Input | no                             |
| Gowher et al. 2012                  | human   | Input-HELA-Rep2             | 0.96       | 1.32  | 0.58 | 0  | 36               | 36               | 36               | 10,704,869   | Input | no                             |
| Gowher et al. 2012                  | mouse   | Input-mm9ES-wt              | 0.96       | 1.31  | 0.86 | 0  | 36               | 36               | 36               | 14,112,421   | Input | no                             |
| Gowher et al. 2012                  | mouse   | Input-Vezf1-ko              | 0.96       | 1.35  | 0.83 | 0  | 36               | 36               | 36               | 13,596,489   | Input | no                             |
| GSE33346                            | mouse   | CapD3-Nocodazole-mES        | 0.66       | 1.78  | 0.96 | 0  | 36               | 36               | 36               | 23,506,234   | ChIP  | unknown                        |
| GSE33346                            | mouse   | CapD3-WT-mES                | 0.77       | 2.75  | 1.33 | 1  | 36               | 36               | 36               | 20,944,575   | ChIP  | yes                            |
| GSE33346                            | mouse   | CapG-Nocodazole-mES         | 0.72       | 1.45  | 0.63 | 0  | 36               | 36               | 36               | 22,267,698   | ChIP  | unknown                        |
| GSE33346                            | mouse   | CapG-WT-mES                 | 0.73       | 1.62  | 1.11 | 1  | 36               | 36               | 36               | 23,314,867   | ChIP  | yes                            |
| GSE33346                            | mouse   | CapH2-Nocodazole-mES        | 0.42       | 2.65  | 1.94 | 2  | 36               | 36               | 36               | 19,469,725   | ChIP  | unknown                        |
| GSE33346                            | mouse   | CapH2-shGFP-mES             | 0.81       | 1.57  | 1.18 | 1  | 36               | 36               | 36               | 22,027,077   | ChIP  | yes                            |
| GSE33346                            | mouse   | CapH2-shNipbl-mES           | 0.49       | 2.23  | 1.31 | 1  | 36               | 36               | 36               | 21,121,437   | ChIP  | unknown                        |
| GSE33346                            | mouse   | Rad21-rep1-WT-mES           | 0.93       | 12.57 | 1.37 | 1  | 36               | 36               | 36               | 14,695,398   | ChIP  | yes                            |
| GSE33346                            | mouse   | Rad21-rep2-WT-mES           | 0.85       | 13.29 | 2.19 | 2  | 36               | 36               | 36               | 20,290,096   | ChIP  | yes                            |
| GSE33346                            | mouse   | WCE-Nocodazole-mES          | 0.61       | 1.54  | 0.97 | 0  | 36               | 36               | 36               | 22,934,718   | Input | no                             |
| GSE33346                            | mouse   | WCE-shGFP-mES               | 0.9        | 1.32  | 0.93 | 0  | 36               | 36               | 36               | 20,882,926   | Input | no                             |
| GSE33346                            | mouse   | WCE-shNipbl-mES             | 0.81       | 1.47  | 0.68 | 0  | 36               | 36               | 36               | 8,493,397    | Input | no                             |
| GSE33850                            | human   | E2A-CCRF-CEM                | 0.2        | 3.3   | 0.46 | -1 | 40               | 40               | 40               | 9,580,539    | ChIP  | yes                            |
| GSE33850                            | human   | GATA3-CCRF-CEM              | 0.14       | 4.27  | 0.54 | 0  | 40               | 40               | 40               | 8,433,815    | ChIP  | yes                            |
| GSE33850                            | human   | HEB-CCRF-CEM-Rep1           | 0.11       | 5.07  | 0.79 | 0  | 39               | 39               | 39               | 11,256,332   | ChIP  | yes                            |
| GSE33850                            | human   | HEB-CCRF-CEM-Rep2           | 0.15       | 4.66  | 0.66 | 0  | 40               | 40               | 40               | 13,394,868   | ChIP  | yes                            |
| GSE33850                            | human   | Input-WCE-CCRF-CEM-Rep1     | 0.21       | 3.28  | 0.24 | -2 | 39               | 39               | 39               | 3,524,267    | Input | no                             |
| GSE33850                            | human   | Input-WCE-CCRF-CEM-Rep2     | 0.81       | 1.33  | 0.08 | -2 | 40               | 40               | 40               | 4,060,683    | Input | no                             |
| GSE33850                            | human   | Input-WCE-Prima2-T-ALL-Rep1 | 0.08       | 2.97  | 1.63 | 2  | 39               | 39               | 39               | 11,209,256   | Input | no                             |
| GSE33850                            | human   | Input-WCE-Prima2-T-ALL-Rep2 | 0.22       | 1.72  | 0.53 | 0  | 40               | 40               | 40               | 11,519,126   | Input | no                             |
| GSE33850                            | human   | Input-WCE-Prima5-T-ALL-Rep1 | 0.21       | 2.32  | 0.69 | 0  | 39               | 39               | 39               | 9,218,972    | Input | no                             |
| GSE33850                            | human   | Input-WCE-Prima5-T-ALL-Rep2 | 0.46       | 1.54  | 0.46 | -1 | 40               | 40               | 40               | 10,635,018   | Input | no                             |
| GSE33850                            | human   | LMO1-Jurkat-Rep1            | 0.27       | 1.67  | 0.12 | -2 | 40               | 40               | 40               | 6,940,746    | ChIP  | yes                            |
| GSE33850                            | human   | LMO1-Jurkat-Rep2            | 0.57       | 1.79  | 0.27 | -1 | 36               | 36               | 36               | 5,951,620    | ChIP  | yes                            |

Continued on next page

Table S1 – Continued from previous page

| Source                  | Species | Library                            | Complexity | NSC   | RSC  | QC | Ave. Read Length | Max. Read Length | Min. Read Length | Mapped reads | Type  | Should exhibit read clustering |
|-------------------------|---------|------------------------------------|------------|-------|------|----|------------------|------------------|------------------|--------------|-------|--------------------------------|
| GSE33850                | human   | LMO2-CCRF-CEM-Rep1                 | 0.11       | 2.74  | 0.28 | -1 | 39               | 39               | 39               | 10,129,558   | ChIP  | yes                            |
| GSE33850                | human   | LMO2-CCRF-CEM-Rep2                 | 0.15       | 2.72  | 0.25 | -1 | 40               | 40               | 40               | 6,136,649    | ChIP  | yes                            |
| GSE33850                | human   | RUNX1-CCRF-CEM-Rep1                | 0.03       | 82.73 | 4.18 | 2  | 39               | 39               | 39               | 8,181,063    | ChIP  | yes                            |
| GSE33850                | human   | RUNX1-CCRF-CEM-Rep2                | 0.38       | 2.56  | 0.46 | -1 | 40               | 40               | 40               | 12,118,147   | ChIP  | yes                            |
| GSE33850                | human   | TAL1-CCRF-CEM-Rep1                 | 0.14       | 5.99  | 1.07 | 1  | 39               | 39               | 39               | 8,072,878    | ChIP  | yes                            |
| GSE33850                | human   | TAL1-CCRF-CEM-Rep2                 | 0.17       | 3.12  | 0.68 | 0  | 40               | 40               | 40               | 17,651,204   | ChIP  | yes                            |
| GSE33850                | human   | TAL1-Prima2-T-ALL-Rep1             | 0.08       | 10.81 | 1.54 | 2  | 40               | 40               | 40               | 4,774,060    | ChIP  | yes                            |
| GSE33850                | human   | TAL1-Prima2-T-ALL-Rep2             | 0.05       | 10.97 | 1.65 | 2  | 39               | 39               | 39               | 7,554,079    | ChIP  | yes                            |
| GSE33850                | human   | TAL1-Prima5-T-ALL-Rep1             | 0.07       | 6.54  | 1.44 | 1  | 40               | 40               | 40               | 6,603,228    | ChIP  | yes                            |
| GSE33850                | human   | TAL1-Prima5-T-ALL-Rep2             | 0.05       | 7.04  | 1.56 | 2  | 39               | 39               | 39               | 9,252,579    | ChIP  | yes                            |
| Avvakumov et al. 2012   | human   | HBO1                               | 0.96       | 1.24  | 1    | 0  | 36               | 36               | 36               | 31,901,032   | ChIP  | yes                            |
| Avvakumov et al. 2012   | human   | input                              | 0.98       | 1.19  | 0.55 | 0  | 36               | 36               | 36               | 31,414,277   | Input | no                             |
| Hunkapiller et al. 2012 | mouse   | InputDNA-Pcl3-shRNA                | 0.64       | 4.68  | 1.18 | 1  | 30               | 30               | 30               | 14,811,561   | Input | no                             |
| Hunkapiller et al. 2012 | mouse   | InputDNA-Pcl3-shRNA6               | 0.95       | 1.2   | 0.4  | -1 | 36               | 36               | 36               | 15,249,656   | Input | no                             |
| Hunkapiller et al. 2012 | mouse   | InputDNA-Pcl3-shRNA7               | 0.95       | 1.22  | 0.55 | 0  | 36               | 36               | 36               | 19,965,283   | Input | no                             |
| Hunkapiller et al. 2012 | mouse   | InputDNA-scramble                  | 0.58       | 5.36  | 1.45 | 1  | 30               | 30               | 30               | 11,650,029   | Input | no                             |
| Hunkapiller et al. 2012 | mouse   | Pcl3-shRNA6                        | 0.88       | 1.28  | 1.38 | 1  | 36               | 36               | 36               | 14,295,321   | ChIP  | no                             |
| Hunkapiller et al. 2012 | mouse   | Pcl3-shRNA7                        | 0.86       | 1.41  | 0.8  | 0  | 36               | 36               | 36               | 10,534,049   | ChIP  | no                             |
| Hunkapiller et al. 2012 | mouse   | Suz12-Pcl3-shRNA                   | 0.78       | 1.41  | 1.43 | 1  | 30               | 30               | 30               | 13,893,316   | ChIP  | unknown                        |
| Hunkapiller et al. 2012 | mouse   | Suz12-scramble                     | 0.78       | 1.77  | 1.38 | 1  | 30               | 30               | 30               | 11,020,925   | ChIP  | yes                            |
| Remeseiro et al. 2012   | mouse   | Input                              | 0.89       | 1.22  | 0.56 | 0  | 40               | 40               | 40               | 25,401,900   | Input | no                             |
| Remeseiro et al. 2012   | mouse   | InputMEFs                          | 0.93       | 1.14  | 0.44 | -1 | 40               | 40               | 40               | 27,631,354   | Input | no                             |
| Remeseiro et al. 2012   | mouse   | KO-SA1                             | 0.86       | 1.35  | 0.64 | 0  | 40               | 40               | 40               | 20,865,198   | ChIP  | no                             |
| Remeseiro et al. 2012   | mouse   | KO-SA2                             | 0.79       | 1.49  | 0.95 | 0  | 40               | 40               | 40               | 26,737,423   | ChIP  | unknown                        |
| Remeseiro et al. 2012   | mouse   | SMC1-KO.R1                         | 0.78       | 4.13  | 1.66 | 2  | 40               | 40               | 40               | 9,276,356    | ChIP  | unknown                        |
| Remeseiro et al. 2012   | mouse   | SMC1-KO.R2                         | 0.82       | 3.98  | 1.93 | 2  | 40               | 40               | 40               | 12,183,058   | ChIP  | unknown                        |
| Remeseiro et al. 2012   | mouse   | SMC1-WT                            | 0.91       | 1.91  | 1.38 | 1  | 40               | 40               | 40               | 22,390,032   | ChIP  | yes                            |
| Remeseiro et al. 2012   | mouse   | SMC3-KO                            | 0.88       | 2.54  | 2.01 | 2  | 40               | 40               | 40               | 27,111,387   | ChIP  | unknown                        |
| Remeseiro et al. 2012   | mouse   | SMC3-WT                            | 0.9        | 1.48  | 1.03 | 1  | 40               | 40               | 40               | 25,310,295   | ChIP  | yes                            |
| Remeseiro et al. 2012   | mouse   | WT-SA1                             | 0.78       | 4.43  | 2.46 | 2  | 40               | 40               | 40               | 26,143,843   | ChIP  | yes                            |
| Remeseiro et al. 2012   | mouse   | WT-SA2                             | 0.65       | 2.12  | 1.59 | 2  | 40               | 40               | 40               | 25,387,005   | ChIP  | yes                            |
| GSE36561                | mouse   | Brd4-mES                           | 0.94       | 1.47  | 1.14 | 1  | 36               | 36               | 36               | 18,715,973   | ChIP  | yes                            |
| GSE36561                | mouse   | Brg1-mES                           | 0.92       | 1.62  | 0.42 | -1 | 36               | 36               | 36               | 4,204,507    | ChIP  | yes                            |
| GSE36561                | mouse   | SA1-mES-Rep1                       | 0.95       | 13.34 | 2.23 | 2  | 36               | 36               | 36               | 6,935,496    | ChIP  | yes                            |
| GSE36561                | mouse   | SA1-mES-Rep2                       | 0.84       | 21.27 | 2.29 | 2  | 36               | 36               | 36               | 18,853,613   | ChIP  | yes                            |
| GSE36561                | mouse   | SA2-mES-Rep1                       | 0.94       | 16.15 | 2.13 | 2  | 36               | 36               | 36               | 7,883,128    | ChIP  | yes                            |
| GSE36561                | mouse   | SA2-mES-Rep2                       | 0.84       | 15.88 | 2.29 | 2  | 36               | 36               | 36               | 18,512,023   | ChIP  | yes                            |
| Vilagos et al. 2012     | mouse   | EBF1-8246.2                        | 0.96       | 3.03  | 1.04 | 1  | 36               | 36               | 36               | 5,435,592    | ChIP  | yes                            |
| Vilagos et al. 2012     | mouse   | EBF1-8246.6                        | 0.96       | 3.1   | 1.13 | 1  | 36               | 36               | 36               | 7,748,856    | ChIP  | yes                            |
| Vilagos et al. 2012     | mouse   | EBF1-mature-B-8271                 | 0.94       | 1.89  | 0.41 | -1 | 36               | 36               | 36               | 5,327,224    | ChIP  | yes                            |
| Vilagos et al. 2012     | mouse   | EBF1-mature-B-9842                 | 0.51       | 2.34  | 1.05 | 1  | 36               | 36               | 36               | 16,361,104   | ChIP  | yes                            |
| Vilagos et al. 2012     | mouse   | Rag2.Pro-B.input-8091.5            | 0.72       | 2.43  | 0.08 | -2 | 36               | 36               | 36               | 2,188,795    | Input | no                             |
| Vilagos et al. 2012     | mouse   | Rag2.Pro-B.input-8091.6            | 0.73       | 2.22  | 0.08 | -2 | 36               | 36               | 36               | 2,267,935    | Input | no                             |
| Vilagos et al. 2012     | mouse   | Rag2.Pro-B.input-8112.1            | 0.97       | 1.39  | 0.17 | -2 | 36               | 36               | 36               | 4,627,018    | Input | no                             |
| Vilagos et al. 2012     | mouse   | Rag2.Pro-B.input-8112.6            | 0.96       | 1.28  | 0.19 | -2 | 36               | 36               | 36               | 6,424,234    | Input | no                             |
| Vilagos et al. 2012     | mouse   | Rag2.Pro-B.input-8123.2            | 0.51       | 2.4   | 0.08 | -2 | 36               | 36               | 36               | 2,220,931    | Input | no                             |
| Vilagos et al. 2012     | mouse   | Rag2.Pro-B.input-8149.8.301DTAAXX  | 0.81       | 3.37  | 0.19 | -2 | 36               | 36               | 36               | 1,534,780    | Input | no                             |
| Vilagos et al. 2012     | mouse   | Rag2.Pro-B.input-8149.8.30222AAXX  | 0.86       | 2.37  | 0.57 | 0  | 36               | 36               | 36               | 5,533,095    | Input | no                             |
| Vilagos et al. 2012     | mouse   | WT.Mature-B.Input-8042.5.208KBAAXX | 0.87       | 1.32  | 0.1  | -2 | 34               | 34               | 34               | 4,297,854    | Input | no                             |
| Vilagos et al. 2012     | mouse   | WT.Mature-B.Input-8042.7.207JYAAXX | 0.89       | 1.57  | 0.12 | -2 | 36               | 36               | 36               | 3,133,666    | Input | no                             |
| Vilagos et al. 2012     | mouse   | WT.Mature-B.Input-8042.7.20CUYAAXX | 0.88       | 1.66  | 0.13 | -2 | 36               | 36               | 36               | 3,220,120    | Input | no                             |
| Vilagos et al. 2012     | mouse   | WT.Mature-B.Input-8042.8.208KDAAXX | 0.87       | 3.9   | 0.2  | -2 | 36               | 36               | 36               | 1,082,634    | Input | no                             |
| Vilagos et al. 2012     | mouse   | WT.Mature-B.Input-8087             | 0.97       | 1.6   | 0.18 | -2 | 32               | 32               | 32               | 4,201,759    | Input | no                             |
| Vilagos et al. 2012     | mouse   | WT.Mature-B.Input-8089             | 0.96       | 1.59  | 0.22 | -2 | 36               | 36               | 36               | 4,101,017    | Input | no                             |
| Vilagos et al. 2012     | mouse   | WT.Mature-B.Input-8094             | 0.96       | 1.53  | 0.16 | -2 | 36               | 36               | 36               | 3,717,876    | Input | no                             |
| Vilagos et al. 2012     | mouse   | WT.Mature-B.Input-8096             | 0.95       | 1.33  | 0.17 | -2 | 36               | 36               | 36               | 5,480,836    | Input | no                             |
| Cardamone et al. 2012   | human   | GPS2                               | 0.89       | 1.77  | 1.2  | 1  | 76               | 76               | 76               | 8,251,524    | ChIP  | yes                            |
| Cardamone et al. 2012   | human   | NCOR-siCTL                         | 0.67       | 3     | 2.11 | 2  | 36.01            | 44               | 36               | 6,572,892    | ChIP  | yes                            |
| Cardamone et al. 2012   | human   | NCOR-siGPS2                        | 0.72       | 2.5   | 0.78 | 0  | 36.01            | 44               | 36               | 5,121,903    | ChIP  | unknown                        |
| Cardamone et al. 2012   | human   | TBL1                               | 0.87       | 1.87  | 1.93 | 2  | 36               | 36               | 36               | 9,798,221    | ChIP  | yes                            |
| Fan et al. 2012         | mouse   | HoxB4-day-16                       | 0.95       | 2.1   | 1.08 | 1  | 41               | 41               | 41               | 8,877,542    | ChIP  | yes                            |
| Fan et al. 2012         | mouse   | HoxB4-day-26                       | 0.94       | 4.72  | 1.79 | 2  | 41               | 41               | 41               | 10,871,546   | ChIP  | yes                            |
| Fan et al. 2012         | mouse   | HoxB4-day-6                        | 0.92       | 2.36  | 1.63 | 2  | 36               | 36               | 36               | 6,336,688    | ChIP  | yes                            |
| Fan et al. 2012         | mouse   | Input-day-16                       | 0.97       | 1.41  | 0.72 | 0  | 41               | 41               | 41               | 12,098,959   | Input | no                             |
| Fan et al. 2012         | mouse   | Input-day-26                       | 0.97       | 1.45  | 0.79 | 0  | 41               | 41               | 41               | 11,607,750   | Input | no                             |

Continued on next page

Table S1 – Continued from previous page

| Source                | Species | Library                 | Complexity | NSC   | RSC  | QC | Ave. Read Length | Max. Read Length | Min. Read Length | Mapped reads | Type  | Should exhibit read clustering |
|-----------------------|---------|-------------------------|------------|-------|------|----|------------------|------------------|------------------|--------------|-------|--------------------------------|
| Fan et al. 2012       | mouse   | Input-day-6             | 0.97       | 1.22  | 0.3  | -1 | 36               | 36               | 36               | 8,817,894    | Input | no                             |
| Fong et al. 2012      | mouse   | MM-MyoD                 | 0.84       | 8.25  | 1.83 | 2  | 39               | 39               | 39               | 21,182,386   | ChIP  | yes                            |
| Fong et al. 2012      | mouse   | MM-NeuroD2              | 0.92       | 5.14  | 1.67 | 2  | 39               | 39               | 39               | 13,996,908   | ChIP  | yes                            |
| Fong et al. 2012      | mouse   | P19-control             | 0.97       | 1.42  | 0.56 | 0  | 38               | 39               | 37               | 8,903,023    | IgG   | no                             |
| Fong et al. 2012      | mouse   | P19-MyoD                | 0.92       | 12.89 | 1.94 | 2  | 39               | 39               | 39               | 12,117,729   | ChIP  | yes                            |
| Fong et al. 2012      | mouse   | P19-NeuroD2             | 0.94       | 7.18  | 1.67 | 2  | 39               | 39               | 39               | 14,558,083   | ChIP  | yes                            |
| Ptasinska et al. 2012 | human   | Input                   | 0.88       | 1.35  | 0.2  | -2 | 40               | 40               | 40               | 5,280,044    | Input | no                             |
| Ptasinska et al. 2012 | human   | RUNX1-Kasumi-1          | 0.97       | 1.37  | 0.83 | 0  | 43.34            | 80               | 36               | 17,904,797   | ChIP  | yes                            |
| Ptasinska et al. 2012 | human   | RUNX1-non-t-8-21        | 0.91       | 3.67  | 1.81 | 2  | 36               | 36               | 36               | 30,747,325   | ChIP  | yes                            |
| Ptasinska et al. 2012 | human   | RUNX1ETO-control        | 0.95       | 1.79  | 0.97 | 0  | 75.95            | 80               | 40               | 7,462,090    | ChIP  | yes                            |
| Ptasinska et al. 2012 | human   | RUNX1ETO-siMM           | 0.94       | 1.65  | 0.97 | 0  | 73.57            | 80               | 40               | 12,843,591   | ChIP  | yes                            |
| Ptasinska et al. 2012 | human   | RUNX1ETO-siRE           | 0.82       | 2.82  | 1.2  | 1  | 67.36            | 80               | 40               | 5,525,324    | ChIP  | no                             |
| Cho et al. 2012       | mouse   | liver-input             | 0.78       | 1.54  | 1.25 | 1  | 42               | 42               | 42               | 29,085,894   | Input | no                             |
| Cho et al. 2012       | mouse   | REV-ERBalpha            | 0.89       | 2.05  | 1.69 | 2  | 42               | 42               | 42               | 32,677,790   | ChIP  | yes                            |
| Cho et al. 2012       | mouse   | REV-ERBbeta             | 0.65       | 2.15  | 2.84 | 2  | 42               | 42               | 42               | 28,812,418   | ChIP  | yes                            |
| Wu et al. 2012        | mouse   | input-RUNX1             | 0.97       | 1.26  | 0.58 | 0  | 34               | 34               | 34               | 11,771,941   | Input | no                             |
| Wu et al. 2012        | mouse   | input-TCF7              | 0.96       | 1.2   | 0.82 | 0  | 36               | 36               | 36               | 22,172,123   | Input | no                             |
| Wu et al. 2012        | mouse   | RUNX1-Rep1              | 0.71       | 3.8   | 2.2  | 2  | 34               | 34               | 34               | 9,285,076    | ChIP  | yes                            |
| Wu et al. 2012        | mouse   | RUNX1-Rep2              | 0.68       | 4.01  | 2.32 | 2  | 34               | 34               | 34               | 10,064,029   | ChIP  | yes                            |
| Wu et al. 2012        | mouse   | TCF7                    | 0.83       | 1.85  | 1    | 1  | 36               | 36               | 36               | 13,877,190   | ChIP  | yes                            |
| Barish et al. 2012    | mouse   | Bcl6-KO-macrophage-NCoR | 0.66       | 1.75  | 1.37 | 1  | 42               | 42               | 42               | 25,491,046   | ChIP  | yes                            |
| Barish et al. 2012    | mouse   | Bcl6-KO-macrophage-SMRT | 0.81       | 1.51  | 1.14 | 1  | 42               | 42               | 42               | 25,610,348   | ChIP  | yes                            |
| Barish et al. 2012    | mouse   | WT-macrophage-NCoR      | 0.84       | 1.81  | 1.79 | 2  | 43               | 43               | 43               | 24,281,787   | ChIP  | yes                            |
| Barish et al. 2012    | mouse   | WT-macrophage-SMRT      | 0.62       | 2.05  | 2.21 | 2  | 43               | 43               | 43               | 27,456,911   | ChIP  | yes                            |

\* Note: datasets from Trompouki et al. 2011 were excluded from figures as the vast majority of them had a very low number of mapped reads.
