# Supplementary material for: Large-Scale Quality Analysis of Published ChIP-seq Data
Source: PubMed Central journal article supplement (PMC3931556; doi:10.1534/g3.113.008680), 2013-12-17
Supplement: supp_g3.113.008680_TableS2.pdf [file supp_g3.113.008680_TableS2.pdf]

**Table S2: Dataset QC evaluation and mapping statistics for MyoD and myogenin datasets**

| Source   | Species | Library                    | Complexity | NSC   | RSC  | QC | Ave. Read Length | Min. Read Length | Max. Read Length | Mapped reads | Type | Should exhibit read clustering |
|----------|---------|----------------------------|------------|-------|------|----|------------------|------------------|------------------|--------------|------|--------------------------------|
| Wold Lab | mouse   | C2C12 60h MyoD             | 0.90       | 12.39 | 1.65 | 2  | 36               | 36               | 36               | 6,771,837    | ChIP | yes                            |
| Wold Lab | mouse   | C2C12 60h myogenin 1       | 0.88       | 9.21  | 1.93 | 2  | 36               | 36               | 36               | 10,385,089   | ChIP | yes                            |
| Wold Lab | mouse   | C2C12 60h myogenin 2       | 0.97       | 6.95  | 1.32 | 1  | 36               | 36               | 36               | 1,198,656    | ChIP | yes                            |
| Wold Lab | mouse   | C2C12 60h myogenin 3       | 0.93       | 1.20  | 0.40 | -1 | 36               | 36               | 36               | 19,600,577   | ChIP | yes                            |
| Wold Lab | mouse   | C2C12 60h 1%FA Input 3     | 0.94       | 1.22  | 0.46 | -1 | 36               | 36               | 36               | 17,856,564   | ChIP | no                             |
| Wold Lab | mouse   | C2C12 60h 1%FA+EGS Input 3 | 0.87       | 4.88  | 1.52 | 2  | 36               | 36               | 36               | 9,092,000    | ChIP | no                             |
